# Supplementary material for: AETA peptide drives Alzheimer’s disease signature of synapse dysfunction
Source: Research Square preprint supplement (doi:10.21203/rs.3.rs-8192959/v1), 2025-12-01
Supplement: Supplementary file 1 [file 6b2e0488436e705ac6937eb9.xlsx]

## Sheet: Table S1
Table S1: Netherlands Brain bank (NBB) human hippocampi tissue
	Brain bank	Sample	Case Number	Sample Number	Group	Age/Sex	Diagnosis	Braak stage	PMD (h)
	NBB	Hippocampus	2020-069	C1	Control	94/M	Non-demented control	III	4.5
			2020-113	C2	Control	87/M	Non-demented control	III	6.5
			2020-120	C3	Control	92/M	Non-demented control	III	7.5
			21-051	C4	Control	77/M	Non-demented control	I	7.5
			11-057	C5	Control	82/M	Control with Non-Hodgkin lymphoma	I	3.5
			12-053	C6	Control	85/M	Control with space-occupying proces	II	4.75
			18-043	C7	Control	65/M	Control with space-occupying proces	I	5.75
			18-080	C8	Control	94/F	Non-demented control	III	4
			18-112	C9	Control	95/F	Non-demented control	III	4.35
			19-125	C10	Control	102/F	Non-demented control	III	4
			2020-028	C11	Control	99/F	Non-demented control	II	4
			2020-052	C12	Control	102/F	Non-demented control	II	5
			2021-005	C14	Control	94/F	Non-demented control	II	4.5
			14-010	AD1	AD	78/M	Alzheimer's disease	V	6
			18-008	AD2	AD	57/M	Alzheimer's disease	V	6.3
			18-90	AD3	AD	97/M	Alzheimer's disease	V	5.2
			20-013	AD4	AD	98/M	Alzheimer's disease	VI	4.75
			2020-031	AD5	AD	72/M	Alzheimer's disease	VI	4.5
			20-040	AD6	AD	74/M	Alzheimer's disease	VI	6.2
			09-217	AD7	AD	75/F	Alzheimer's disease	V	5
			17-092	AD8	AD	72/F	Alzheimer's disease	V	6.2
			17-102	AD9	AD	98/F	Alzheimer's disease	V	6
			18-049	AD10	AD	82/F	Alzheimer's disease	V	5.5
			2021-037	AD11	AD	73/F	Alzheimer's disease	VI	5.25
			21-039	AD12	AD	66/F	Alzheimer's disease	VI	5
			2021-044	AD13	AD	86/F	Alzheimer's disease	V	3.85
			91-038	AD14	AD	98/F	Alzheimer's disease	V	4
			92-100	AD15	AD	77/F	Alzheimer's disease	V	4.25
			97-061	AD16	AD	87/F	Alzheimer's disease	V	3
			97-220	AD17	AD	78/F	Alzheimer's disease	V	3.2

## Sheet: Table S2
Table S2: Neuro-CEB human prefrontal cortex tissue
	Brain bank	Sample	Case number	Sample Number	Group	Age/Sex	Diagnosis	Braak stage	PMD (h)
	Neuro-CEB	Prefrontal Cortex	3549	C2	Control	69/M	Non-demented control	-	6
			4078	C3	Control	73/M	Non-demented control	II	10
			5991	C6	Control	66/M	vasculopathy	-	7.25
			6203	C7	Control	78/M	Non-demented control	-	23
			8866	C9	Control	84/M	Non-demented control	-	15.5
			3732	C10	Control	66/M	amyloid angiopaty	-	nd
			4161	C11	Control	85/M	amyloid angiopaty	I	nd
			5433	C4	Control	52/F	Non-demented control	-	29
			6863	C8	Control	89/F	Non-demented control	-	12
			3872	C13	Control	94/F	amyloid angiopaty	III	nd
			3082	AD1	AD	78/M	Alzheimer's disease	VI	18
			4551	AD2	AD	84/M	Alzheimer's disease	VI	nd
			4570	AD3	AD	64/M	Alzheimer's disease	VI	3
			4918	AD4	AD	63/M	Alzheimer's disease	VI	nd
			6245	AD6	AD	60/M	Alzheimer's disease	VI	31
			6855	AD8	AD	76/M	Alzheimer's disease	VI	nd
			7549	AD11	AD	60/M	Alzheimer's disease	VI	37
			7851	AD12	AD	67/M	Alzheimer's disease	VI	30
			6569	AD13	AD	50/M	Alzheimer's disease	VI	56
			7689	AD14	AD	72/M	Alzheimer's disease	VI	44
			5796	AD15	AD	70/M	Alzheimer's disease	VI	6
			5869	AD16	AD	81/M	Alzheimer's disease	VI	20
			4278	AD17	AD	67/M	Alzheimer's disease	VI	19
			8629	AD18	AD	81/M	Alzheimer's disease	VI	18
			6757	AD7	AD	73/F	Alzheimer's disease	VI	24
			6935	AD19	AD	84/F	amyloid angiopaty + Alzheimer's disease	VI	52
			7145	AD20	AD	56/F	amyloid angiopaty + Alzheimer's disease	VI	26
			8747	AD22	AD	80/F	Alzheimer's disease	VI	nd
			5946	AD23	AD	89/F	Alzheimer's disease	VI	10
			4403	AD24	AD	85/F	Alzheimer's disease	VI	28
			4319	AD25	AD	90/F	Alzheimer's disease	VI	32

## Sheet: Table S3
Table S3: Primers for qPCR experiments
	Primers	Accession number	Forward primer	Reverse primer	Amplicon length
	Mouse
	Ccl4	NM_013652.2	GCCCTCTCTCTCCTCTTGCT	GAGGGTCAGAGCCCATTG	72
	Vim	NM_011701.4	CCAACCTTTTCTTCCCTGAAC	TTGAGTGGGTGTCAACCAGA	70
	Cyclophilin A	NM_008907.1	AGCATACAGGTCCTGGCATC	TTCACCTTCCCAAAGACCAC	126
	Human
	APP		TCATTGGACTCATGGTGGG	CCACCACACCATGATGAATG	105
	GAPDH		GGTCTCCTCTGACTTCAACA	GTGAGGGTCTCTCTCTTCCT	227
	Taqman probes	Accession number	Assay ID	Assay Design	Amplicon length
	C1qa	NM_007572.2	Mm00432142_m1	Probe spans exons	80
	Trem2	NM_001272078.1	Mm04209424_g1	Probe spans exons	90

## Sheet: Table S4
Table S4. Differential expression analysis between hippocampi RNA-seq samples from adult AETA-m (n=4) and WT (n=4) mice, performed using DESeq2
Contrast	Gene	Log2FoldChange	Pvalue	Padj	BaseMean_WT	BaseMean_AETAm
AETAm_vs_WT	Thy1	1.17086	0	0	26667	54446.8
AETAm_vs_WT	Bok	-0.406657	3.29842e-15	2.62785e-11	2007.25	1372.5
AETAm_vs_WT	Farp2	-0.918636	1.32517e-14	7.03841e-11	319	154
AETAm_vs_WT	Npr3	0.334818	1.72351e-13	6.86561e-10	1285.5	1469.75
AETAm_vs_WT	Fras1	0.399961	1.30685e-12	4.16466e-09	1013.75	1207.5
AETAm_vs_WT	Stk25	-0.187869	4.10603e-12	1.09042e-08	10179.8	8092.75
AETAm_vs_WT	Itgb8	0.278801	5.88141e-11	1.33878e-07	2852.5	3139.25
AETAm_vs_WT	Atp7a	0.923219	2.29701e-10	4.57506e-07	288.75	497.5
AETAm_vs_WT	Olfm1	-0.174141	3.7142e-10	6.57579e-07	45964.8	36886.2
AETAm_vs_WT	Slc12a2	0.477884	7.24783e-10	1.15487e-06	4032.75	5090
AETAm_vs_WT	Fat1	0.302624	1.09733e-09	1.58954e-06	1870.25	2085
AETAm_vs_WT	Eef1a2	-0.158109	2.01191e-09	2.67148e-06	33946	27596.5
AETAm_vs_WT	Cabp7	-0.147992	2.8742e-09	3.27126e-06	11054	9030
AETAm_vs_WT	Ncdn	-0.11569	2.75481e-09	3.27126e-06	106505	88964.8
AETAm_vs_WT	Zkscan3	0.320429	3.21795e-09	3.37309e-06	2291.25	2576.5
AETAm_vs_WT	Ccdc141	0.530753	3.38706e-09	3.37309e-06	794.25	1037.25
AETAm_vs_WT	Hnrnpc	-0.15672	4.03084e-09	3.77809e-06	8321.75	6777.5
AETAm_vs_WT	Atp11c	0.58126	4.28795e-09	3.79579e-06	795.75	1080.75
AETAm_vs_WT	Notch2	0.46039	5.53038e-09	4.63795e-06	1923.5	2406.25
AETAm_vs_WT	Rnf112	-0.185547	9.9616e-09	7.87861e-06	21954.8	17516.5
AETAm_vs_WT	Ppp1r9b	-0.0969126	1.03835e-08	7.87861e-06	54693.8	46313
AETAm_vs_WT	Postn	1.15253	1.69883e-08	1.17692e-05	81.75	163.75
AETAm_vs_WT	Nek5	1.43454	1.68604e-08	1.17692e-05	34.5	84.5
AETAm_vs_WT	Ly6e	-0.171362	2.47683e-08	1.64441e-05	6418.75	5166
AETAm_vs_WT	Camk2a	-0.111144	3.36843e-08	2.1469e-05	186262	156235
AETAm_vs_WT	Aox3	1.12205	4.1529e-08	2.54509e-05	68.75	136.5
AETAm_vs_WT	Rbms1	0.413454	5.24011e-08	3.09244e-05	715.5	865.25
AETAm_vs_WT	Cflar	0.337274	5.85733e-08	3.33324e-05	1214	1386
AETAm_vs_WT	Mmp17	-0.162413	6.46941e-08	3.55461e-05	10545	8554.75
AETAm_vs_WT	Atp11a	0.314271	6.79497e-08	3.56472e-05	3425.25	3856.25
AETAm_vs_WT	Tubb2b	-0.209976	6.93525e-08	3.56472e-05	6642.75	5219.75
AETAm_vs_WT	Gm26684	1.73276	9.20396e-08	4.583e-05	46.25	138.75
AETAm_vs_WT	Rnf152	0.755895	1.47811e-07	7.13704e-05	338.5	521.5
AETAm_vs_WT	Gm28729	1.45387	1.52582e-07	7.15073e-05	28	69.5
AETAm_vs_WT	Slc39a4	1.71319	1.58978e-07	7.23759e-05	62.75	184.5
AETAm_vs_WT	Abca1	0.30031	1.88015e-07	7.88375e-05	1839.75	2040.75
AETAm_vs_WT	Flna	0.359569	1.81743e-07	7.88375e-05	4764.5	5522.25
AETAm_vs_WT	Car14	0.795718	1.84904e-07	7.88375e-05	415.5	654.25
AETAm_vs_WT	Sik2	0.25258	2.01371e-07	8.2273e-05	1358.5	1463.5
AETAm_vs_WT	Tns4	2.41154	2.22052e-07	8.84546e-05	12.5	62
AETAm_vs_WT	Zfp185	0.894344	2.56986e-07	9.98736e-05	221	374.25
AETAm_vs_WT	Lrp6	0.328749	2.8256e-07	0.000105763	2782.25	3150.5
AETAm_vs_WT	Cep350	0.257458	2.92052e-07	0.000105763	2369.75	2552.5
AETAm_vs_WT	Ppargc1b	0.496862	2.90789e-07	0.000105763	336.5	430.5
AETAm_vs_WT	Slc4a10	0.203651	3.18872e-07	0.000112909	11616.2	12162
AETAm_vs_WT	Aldoc	-0.145916	3.42796e-07	0.000118742	26438.8	21696.8
AETAm_vs_WT	Ddn	-0.127515	3.88977e-07	0.000131872	83216.2	69089.5
AETAm_vs_WT	Efs	0.570518	4.4174e-07	0.000146639	579	784.5
AETAm_vs_WT	Pdyn	-0.369955	4.98907e-07	0.000158992	630	441.75
AETAm_vs_WT	Vcam1	0.566046	4.97732e-07	0.000158992	1082	1461
AETAm_vs_WT	Pcnx	0.257014	5.19605e-07	0.000162341	7774	8392.25
AETAm_vs_WT	Ankrd46	-0.125143	5.34603e-07	0.000163815	9720	8074.25
AETAm_vs_WT	Hfe	0.715203	9.49367e-07	0.000283136	222.75	330.25
AETAm_vs_WT	Six3	2.04528	9.59541e-07	0.000283136	31.25	116.5
AETAm_vs_WT	Iqgap1	0.437139	1.00704e-06	0.000291748	1353.75	1661.25
AETAm_vs_WT	Lrriq1	1.10362	1.09085e-06	0.000310386	78.25	149.25
AETAm_vs_WT	Acss3	0.823974	1.15565e-06	0.000323056	140.5	227
AETAm_vs_WT	Tgfbi	1.01689	1.24065e-06	0.000340838	170.5	318.5
AETAm_vs_WT	Zfyve16	0.300837	1.26345e-06	0.000341217	907.5	1009.75
AETAm_vs_WT	Iqub	1.03423	1.42502e-06	0.000378437	123.75	227.5
AETAm_vs_WT	Gpd1	-0.189441	1.50846e-06	0.000391131	5842.75	4633.25
AETAm_vs_WT	Mtmr10	0.276417	1.52191e-06	0.000391131	988	1077.5
AETAm_vs_WT	C1ql2	-0.305215	1.75762e-06	0.000444539	4548.25	3337.5
AETAm_vs_WT	Cfap44	0.676653	1.85158e-06	0.000460987	376.5	540
AETAm_vs_WT	Kcnip2	-0.194872	1.88992e-06	0.000463291	8501.25	6718
AETAm_vs_WT	Tmtc1	0.296423	1.95077e-06	0.000468241	2710.25	3011.25
AETAm_vs_WT	Heg1	0.488986	1.96888e-06	0.000468241	1433.25	1826.75
AETAm_vs_WT	Nefl	-0.102688	2.04462e-06	0.000479104	22018.5	18574.5
AETAm_vs_WT	Thrsp	-0.256417	2.08626e-06	0.000481776	1099.75	834.5
AETAm_vs_WT	Rbp1	0.754325	2.19134e-06	0.000498392	371	572.75
AETAm_vs_WT	Brwd3	0.394777	2.22077e-06	0.000498392	705.75	839.25
AETAm_vs_WT	Arhgef25	-0.152095	2.27977e-06	0.000504526	13647.8	11146
AETAm_vs_WT	Plch2	-0.132553	2.54533e-06	0.00055558	8001.75	6613
AETAm_vs_WT	Tgfbr3	0.474864	2.61588e-06	0.000563262	1155.5	1463.75
AETAm_vs_WT	Map3k19	0.558085	2.94592e-06	0.00062587	285.25	376
AETAm_vs_WT	Akap9	0.283115	3.1842e-06	0.000658922	2995	3278
AETAm_vs_WT	Qser1	0.283729	3.15506e-06	0.000658922	940.5	1035.75
AETAm_vs_WT	Trip11	0.236878	3.30184e-06	0.000674507	2221.75	2360
AETAm_vs_WT	Plxnb2	0.382931	3.43195e-06	0.000692212	3424.25	4048
AETAm_vs_WT	Foxj1	0.613209	3.62135e-06	0.000721283	556.75	760.5
AETAm_vs_WT	Usp54	0.208863	3.77877e-06	0.000743344	3434.75	3570.25
AETAm_vs_WT	Slc16a9	0.852814	3.88247e-06	0.00075443	200.5	329.25
AETAm_vs_WT	Lrrc10b	-0.206212	4.31533e-06	0.00082844	2358.25	1847.25
AETAm_vs_WT	Cdc14b	0.40419	4.46542e-06	0.000847048	611	731.75
AETAm_vs_WT	Hpcal4	-0.118962	4.65428e-06	0.000872486	41848.5	34995.2
AETAm_vs_WT	Arhgef5	0.826557	5.31467e-06	0.000975865	169.25	275.5
AETAm_vs_WT	Sntb2	0.197485	5.32824e-06	0.000975865	2241.5	2323
AETAm_vs_WT	Sorbs3	0.353633	5.53133e-06	0.00100155	1352.5	1561.75
AETAm_vs_WT	Doc2b	-0.185691	5.65242e-06	0.00101197	7810	6220.5
AETAm_vs_WT	Mospd1	0.388308	6.16767e-06	0.00109195	411.75	488.25
AETAm_vs_WT	Ccdc24	1.25808	6.2422e-06	0.001093	29.25	63.5
AETAm_vs_WT	Amotl1	0.402277	7.08711e-06	0.00121032	1183	1424.25
AETAm_vs_WT	Pbxip1	0.329135	7.14008e-06	0.00121032	2907	3317.25
AETAm_vs_WT	Pcdh1	-0.107343	7.03979e-06	0.00121032	22514.8	18953.2
AETAm_vs_WT	Mitf	0.533092	7.24828e-06	0.00121573	469.5	612
AETAm_vs_WT	Ttc21a	0.852392	7.51849e-06	0.00124791	177.25	287.5
AETAm_vs_WT	Slc7a11	0.460599	8.18078e-06	0.00134384	1815	2263.5
AETAm_vs_WT	Crb2	0.819546	8.69611e-06	0.00138735	286.75	461.25
AETAm_vs_WT	Arl4a	0.290283	8.61164e-06	0.00138735	1278.5	1409.5
AETAm_vs_WT	Zfp462	0.284225	8.70687e-06	0.00138735	2528.25	2776.5
AETAm_vs_WT	Nfe2l2	0.327188	9.00114e-06	0.00142004	663.5	753.25
AETAm_vs_WT	Spata18	1.1891	9.65745e-06	0.00150865	48.75	99.5
AETAm_vs_WT	Chd2	0.172735	1.0115e-05	0.00156478	3020.25	3085
AETAm_vs_WT	Mmd	-0.142437	1.08743e-05	0.00166606	17126	14067.5
AETAm_vs_WT	Dnah11	0.924102	1.11253e-05	0.00168829	113.25	193
AETAm_vs_WT	Chgb	-0.0997255	1.24497e-05	0.00187145	24913.2	21073.8
AETAm_vs_WT	Col14a1	0.949639	1.28253e-05	0.00190989	59.25	101.75
AETAm_vs_WT	Firre	0.188347	1.29794e-05	0.00191495	4269.25	4383
AETAm_vs_WT	Pnma8a	-0.135969	1.3124e-05	0.00191851	8205.25	6782
AETAm_vs_WT	Flnb	0.260271	1.35065e-05	0.00193885	3727.5	4013
AETAm_vs_WT	Hipk3	0.260362	1.34227e-05	0.00193885	4014	4357.25
AETAm_vs_WT	Slc16a2	0.400757	1.40192e-05	0.00198205	2811.75	3382.75
AETAm_vs_WT	Dock5	0.447264	1.40562e-05	0.00198205	635	775.25
AETAm_vs_WT	Syne3	0.902869	1.43746e-05	0.00200917	96.25	163
AETAm_vs_WT	Arsg	0.418557	1.47997e-05	0.00201554	1040.25	1244.5
AETAm_vs_WT	Slc6a20b	1.49678	1.46028e-05	0.00201554	22.25	57.75
AETAm_vs_WT	Phactr2	0.402895	1.46921e-05	0.00201554	1669.75	2020.75
AETAm_vs_WT	Cfap70	0.88708	1.51861e-05	0.00205064	69.75	116.25
AETAm_vs_WT	Ttll4	0.204845	1.59183e-05	0.00211369	1296.5	1351.5
AETAm_vs_WT	Lum	0.770475	1.58315e-05	0.00211369	140.25	219.75
AETAm_vs_WT	Fndc3b	0.291306	1.62825e-05	0.00214418	1090	1206.5
AETAm_vs_WT	Ccnd2	0.137178	1.70393e-05	0.00216265	4467.25	4436.75
AETAm_vs_WT	Foxg1	-0.156361	1.68395e-05	0.00216265	7202.5	5872.75
AETAm_vs_WT	Serpina3n	-0.206588	1.6758e-05	0.00216265	1817.75	1427.5
AETAm_vs_WT	Dnajc3	0.271262	1.7132e-05	0.00216265	3015.5	3323.25
AETAm_vs_WT	Fmn1	0.330195	1.66815e-05	0.00216265	811.5	923.5
AETAm_vs_WT	Rnf157	-0.115698	1.72371e-05	0.00216265	14346	11991.8
AETAm_vs_WT	Prrt1	-0.198781	1.76372e-05	0.00218915	11692.5	9280.5
AETAm_vs_WT	Nrgn	-0.154905	1.77231e-05	0.00218915	46852.8	38140.2
AETAm_vs_WT	Gsn	0.232236	2.01968e-05	0.0024232	2170.75	2296
AETAm_vs_WT	Fkbp9	0.31862	2.02175e-05	0.0024232	1485	1682.25
AETAm_vs_WT	Trpm3	0.924571	2.02263e-05	0.0024232	5421.25	9369.25
AETAm_vs_WT	Scn2b	-0.104139	1.99486e-05	0.0024232	14189.2	11971.5
AETAm_vs_WT	Enc1	-0.104509	2.07231e-05	0.00242955	46789	39508.2
AETAm_vs_WT	Flrt1	0.273273	2.05711e-05	0.00242955	894	984.25
AETAm_vs_WT	Fzd4	0.826912	2.07367e-05	0.00242955	669.5	1086.25
AETAm_vs_WT	Ptprb	0.278686	2.20096e-05	0.00249227	1706.25	1872.25
AETAm_vs_WT	Prrg4	1.29956	2.15281e-05	0.00249227	41.5	92
AETAm_vs_WT	Snph	-0.111687	2.20114e-05	0.00249227	19395	16293.2
AETAm_vs_WT	Mrfap1	-0.100143	2.20541e-05	0.00249227	13944.8	11771.5
AETAm_vs_WT	Pnma8b	-0.117718	2.20529e-05	0.00249227	24122.8	20141.5
AETAm_vs_WT	Mob1b	0.23354	2.25447e-05	0.00252977	1722	1832.5
AETAm_vs_WT	Alms1	0.388307	2.29062e-05	0.00255236	431	511.5
AETAm_vs_WT	Flrt2	0.248864	2.33967e-05	0.00258891	2493	2704.75
AETAm_vs_WT	Slc5a3	0.308402	2.47797e-05	0.00272303	2077.25	2351.25
AETAm_vs_WT	Ephx1	0.429875	2.55324e-05	0.00278653	995.5	1219.25
AETAm_vs_WT	Atp6v0e2	-0.117806	2.60413e-05	0.00282274	12736.8	10607.5
AETAm_vs_WT	Acox2	1.64552	2.69581e-05	0.00290236	14	39
AETAm_vs_WT	Cfap54	0.579596	2.71458e-05	0.00290296	319	423.75
AETAm_vs_WT	Wls	0.283839	2.73821e-05	0.00290871	1301.75	1434.25
AETAm_vs_WT	Plce1	0.403665	2.85803e-05	0.00301589	635.75	758
AETAm_vs_WT	Nsmf	-0.128375	2.99749e-05	0.0031217	31635.2	26135.2
AETAm_vs_WT	Vldlr	0.249913	2.98992e-05	0.0031217	3952	4223
AETAm_vs_WT	Atp2b3	0.290254	3.04435e-05	0.00313775	8266.5	9156.5
AETAm_vs_WT	Olig1	-0.157942	3.07198e-05	0.00313775	4033.25	3279.75
AETAm_vs_WT	Ywhag	-0.0971176	3.0597e-05	0.00313775	52609	44628.5
AETAm_vs_WT	Calm1	-0.0953658	3.20082e-05	0.00314826	115737	98153
AETAm_vs_WT	Ccdc39	0.2683	3.12937e-05	0.00314826	1045.5	1140
AETAm_vs_WT	Spen	0.210019	3.1989e-05	0.00314826	5178.5	5418.25
AETAm_vs_WT	Ctdspl	0.197863	3.11049e-05	0.00314826	1440.5	1492.25
AETAm_vs_WT	Crebrf	0.175913	3.17996e-05	0.00314826	2387.75	2443.5
AETAm_vs_WT	Ghr	0.363166	3.16311e-05	0.00314826	360.75	419.5
AETAm_vs_WT	Cul4b	0.395327	3.29665e-05	0.00322262	1886.25	2254.75
AETAm_vs_WT	Phldb2	0.585485	3.33388e-05	0.00323	359	489.75
AETAm_vs_WT	Coro2b	-0.107766	3.34473e-05	0.00323	11708	9845.5
AETAm_vs_WT	Arhgef4	-0.109996	3.41045e-05	0.00327362	11672.5	9764.5
AETAm_vs_WT	Itprid2	0.324567	3.48029e-05	0.00329767	2519.5	2865.25
AETAm_vs_WT	Fhad1	0.673822	3.4976e-05	0.00329767	290	424.25
AETAm_vs_WT	Tead1	0.28446	3.47471e-05	0.00329767	2193.5	2416.75
AETAm_vs_WT	Bicc1	0.456509	3.80372e-05	0.00353973	367.25	454.75
AETAm_vs_WT	Pltp	0.375443	3.78287e-05	0.00353973	2799.5	3273
AETAm_vs_WT	Ncs1	-0.114581	3.82097e-05	0.00353973	17612	14719.2
AETAm_vs_WT	Psd2	0.346069	4.03403e-05	0.00371551	2435.5	2813.75
AETAm_vs_WT	Pifo	1.23356	4.08544e-05	0.00371985	36.5	75.5
AETAm_vs_WT	Zc3h12c	0.337861	4.07209e-05	0.00371985	639.75	729.5
AETAm_vs_WT	Lrrc23	0.787105	4.14365e-05	0.00373022	152.25	237.5
AETAm_vs_WT	ENSMUSG00000120345	2.12543	4.13448e-05	0.00373022	14.75	60
AETAm_vs_WT	Igf2r	0.255062	4.36828e-05	0.0038885	2214	2391.5
AETAm_vs_WT	Odad1	0.548507	4.35711e-05	0.0038885	218.25	287
AETAm_vs_WT	Eno4	0.761649	4.3929e-05	0.00388869	117	180.75
AETAm_vs_WT	Glb1l2	1.15428	4.47371e-05	0.00393834	41.25	83
AETAm_vs_WT	Sntb1	0.556437	4.59522e-05	0.00402309	424	570
AETAm_vs_WT	Caly	-0.137088	4.66101e-05	0.00405839	5934.5	4893.5
AETAm_vs_WT	Ddr2	0.534195	4.69467e-05	0.00406548	577.25	762.5
AETAm_vs_WT	Slc23a2	0.211211	4.72884e-05	0.00407293	7237.5	7578.5
AETAm_vs_WT	Dmxl1	0.1972	5.04459e-05	0.00432153	3043.25	3152.75
AETAm_vs_WT	Celsr1	0.341255	5.09739e-05	0.00434341	550	626.75
AETAm_vs_WT	Rock1	0.238676	5.1509e-05	0.00436566	1604	1710.5
AETAm_vs_WT	Gpr37l1	-0.124227	5.41705e-05	0.00448228	6606	5487.75
AETAm_vs_WT	Kat6a	0.230347	5.40353e-05	0.00448228	3519.75	3743.25
AETAm_vs_WT	Dennd4c	0.314686	5.39423e-05	0.00448228	837.5	932.5
AETAm_vs_WT	Ypel5	-0.135788	5.35999e-05	0.00448228	4112.5	3386.75
AETAm_vs_WT	Cfap69	0.354756	5.42914e-05	0.00448228	739.75	860.25
AETAm_vs_WT	B4galnt1	-0.136879	5.48264e-05	0.00450311	4751	3923
AETAm_vs_WT	Cert1	0.154232	5.586e-05	0.00454119	3852.75	3876.5
AETAm_vs_WT	Arhgap18	0.415056	5.5704e-05	0.00454119	286	348.5
AETAm_vs_WT	Mapk8ip2	-0.104555	5.729e-05	0.0046104	18054	15212
AETAm_vs_WT	Lca5l	0.684477	5.72242e-05	0.0046104	103.75	148.25
AETAm_vs_WT	Cpne6	-0.121576	5.85153e-05	0.00463872	27061.2	22446
AETAm_vs_WT	Npr1	0.533631	5.84729e-05	0.00463872	290.5	379.5
AETAm_vs_WT	Tmem237	0.362903	5.82298e-05	0.00463872	845.75	995.75
AETAm_vs_WT	Rfng	-0.17878	5.98182e-05	0.00471853	2849.75	2277.5
AETAm_vs_WT	Nufip2	0.264936	6.05365e-05	0.00475167	1771.25	1926.75
AETAm_vs_WT	Sfpq	0.162084	6.12929e-05	0.00478745	7551.5	7645
AETAm_vs_WT	F11r	0.497558	6.26521e-05	0.00486975	313.25	400.75
AETAm_vs_WT	Rif1	0.266753	6.32174e-05	0.00488984	1145.5	1244.25
AETAm_vs_WT	Asah2	0.378475	6.74432e-05	0.00519149	668.25	783.25
AETAm_vs_WT	Lats1	0.18548	6.80125e-05	0.00521015	2103	2161.5
AETAm_vs_WT	Eno2	-0.0909695	6.91169e-05	0.00526942	35231.5	29953.5
AETAm_vs_WT	Elk1	-0.169314	6.96701e-05	0.0052863	4168.25	3370.5
AETAm_vs_WT	Wfikkn2	1.58231	7.05286e-05	0.00532608	88.75	251.5
AETAm_vs_WT	Septin10	0.61602	7.19855e-05	0.00533496	216.75	301
AETAm_vs_WT	Esyt2	0.155769	7.19595e-05	0.00533496	2190.5	2204
AETAm_vs_WT	Pnpla7	-0.255782	7.15053e-05	0.00533496	868.5	661.5
AETAm_vs_WT	Olig2	-0.282664	7.14918e-05	0.00533496	1230.75	924.25
AETAm_vs_WT	H2-Aa	1.34497	7.38131e-05	0.00544509	60.75	140.25
AETAm_vs_WT	B4galt1	0.433268	7.47637e-05	0.00548979	397	484.75
AETAm_vs_WT	Slc16a12	1.02145	7.62431e-05	0.00556514	104.5	196.5
AETAm_vs_WT	Mtf1	0.164994	7.68376e-05	0.00556514	1622.75	1645.5
AETAm_vs_WT	Ppp2r2c	-0.0898648	7.67235e-05	0.00556514	24088.5	20506.2
AETAm_vs_WT	Plekhg3	0.246603	7.86146e-05	0.00566808	1409.5	1507.5
AETAm_vs_WT	Cfap206	0.946634	7.92348e-05	0.00568706	81.75	141.25
AETAm_vs_WT	Rogdi	-0.133135	7.9629e-05	0.00568972	6995	5780
AETAm_vs_WT	Tfdp2	0.216366	8.07517e-05	0.00574418	1985.25	2075.75
AETAm_vs_WT	Map3k15	0.793967	8.1199e-05	0.00575033	120	189.75
AETAm_vs_WT	Atp6v0a1	-0.0993259	8.31389e-05	0.00586166	24335.8	20603.5
AETAm_vs_WT	Cfap43	0.919093	8.81369e-05	0.00618025	135.75	225
AETAm_vs_WT	Adnp	0.194045	8.84334e-05	0.00618025	2509.75	2594.75
AETAm_vs_WT	Utrn	0.253593	8.98947e-05	0.00620669	2051.75	2218.75
AETAm_vs_WT	Acacb	0.679897	8.92754e-05	0.00620669	386.25	565.75
AETAm_vs_WT	Rpl9	-0.106638	8.99803e-05	0.00620669	8334.25	6997.25
AETAm_vs_WT	Polr1a	0.23877	9.06441e-05	0.00622553	2078	2207.25
AETAm_vs_WT	Shank3	-0.095161	9.22759e-05	0.0063104	15331.8	13013
AETAm_vs_WT	Ap1s1	-0.127337	9.46977e-05	0.00644834	6111.75	5052.25
AETAm_vs_WT	Lamp2	0.298608	9.5624e-05	0.00648371	3257.75	3646.75
AETAm_vs_WT	Mical2	-0.142471	9.65691e-05	0.00649846	23291	19194
AETAm_vs_WT	2410004P03Rik	0.748754	9.66572e-05	0.00649846	130.5	193.5
AETAm_vs_WT	Cldn10	-0.213733	9.86293e-05	0.00660319	1050	821
AETAm_vs_WT	Acaa2	0.488826	9.91835e-05	0.00661041	617.75	786.75
AETAm_vs_WT	Ctnna1	0.285219	9.95669e-05	0.00661041	2504.75	2766.25
AETAm_vs_WT	Ripk4	1.2146	0.000100012	0.00661239	25	53
AETAm_vs_WT	Cep162	0.254712	0.000101768	0.00670072	856.75	930.75
AETAm_vs_WT	Fgd4	0.225092	0.000103765	0.00677623	2107	2228.25
AETAm_vs_WT	Fbn1	0.469984	0.000103345	0.00677623	548	685.25
AETAm_vs_WT	Myof	0.675859	0.000104319	0.00678455	319.75	464.75
AETAm_vs_WT	Cavin2	0.448136	0.000107871	0.00695876	384.25	473.75
AETAm_vs_WT	D930048N14Rik	0.384044	0.000107757	0.00695876	231	274
AETAm_vs_WT	Best3	0.625951	0.000109473	0.00703366	85.75	119.75
AETAm_vs_WT	Kcnab2	-0.0918092	0.000111382	0.00712754	31589.2	26804.2
AETAm_vs_WT	Nup153	0.150135	0.000112345	0.00712964	2422	2428.25
AETAm_vs_WT	Rsph1	0.632094	0.000114282	0.00712964	184.5	256
AETAm_vs_WT	Cpq	0.563834	0.000113637	0.00712964	432.5	587.5
AETAm_vs_WT	Pik3r1	0.141401	0.000113857	0.00712964	4496.5	4478.75
AETAm_vs_WT	Tmsb4x	-0.122934	0.000114448	0.00712964	24732	20481
AETAm_vs_WT	Aox1	0.460685	0.000113367	0.00712964	362.25	453.25
AETAm_vs_WT	Lcmt2	-0.469342	0.000114547	0.00712964	264.5	172.25
AETAm_vs_WT	Smad5	0.187128	0.00011666	0.00723295	1882.5	1929.5
AETAm_vs_WT	Tubb2a	-0.110372	0.000118654	0.00732804	24391.2	20454
AETAm_vs_WT	Lamb1	0.220453	0.00012247	0.00753451	1978.5	2078.25
AETAm_vs_WT	Kank1	0.290383	0.000124282	0.0075874	871.25	968.25
AETAm_vs_WT	Cpt1b	0.88477	0.00012403	0.0075874	61.25	105.25
AETAm_vs_WT	Gm16201	1.27235	0.000125206	0.00761465	23.5	51.75
AETAm_vs_WT	Cpt1a	0.37633	0.000129014	0.00770123	1300.5	1540.5
AETAm_vs_WT	Slco1a4	0.224499	0.000128171	0.00770123	1566	1645.75
AETAm_vs_WT	Ltbr	0.404542	0.000129047	0.00770123	273.25	329.25
AETAm_vs_WT	Ppp1r3b	1.13515	0.000128713	0.00770123	87.75	176.5
AETAm_vs_WT	Arfgef2	0.21077	0.000127599	0.00770123	3828.5	3999.75
AETAm_vs_WT	Cnih2	-0.128529	0.000131132	0.0077965	14090.5	11668.5
AETAm_vs_WT	Steap4	1.76995	0.000133156	0.00788738	25.25	80.5
AETAm_vs_WT	Ltbp3	0.361149	0.000135184	0.00797784	1761.25	2063.75
AETAm_vs_WT	Cplx2	-0.102129	0.000137741	0.00809876	70377	59364.5
AETAm_vs_WT	Actl6b	-0.155097	0.000139837	0.00819178	3529.5	2875
AETAm_vs_WT	Eif4h	-0.0788412	0.000142916	0.00834146	13024	11165
AETAm_vs_WT	Dnai3	0.992722	0.00014572	0.00847407	54.75	98.75
AETAm_vs_WT	Arhgef12	0.173794	0.000146596	0.00849403	11596	11824.2
AETAm_vs_WT	Lgals1	0.406879	0.000148142	0.00855252	363.5	436.25
AETAm_vs_WT	Rsph4a	0.546433	0.000148894	0.00856492	274.75	358.5
AETAm_vs_WT	Prps2	0.329669	0.000151238	0.00866841	1438.25	1627.5
AETAm_vs_WT	Wnk1	0.189584	0.000153482	0.0087655	10931.5	11232.5
AETAm_vs_WT	Dlg4	-0.0954193	0.000155604	0.00885498	38179.2	32381.8
AETAm_vs_WT	Ctnnal1	0.450352	0.000157584	0.00893575	807.5	1001
AETAm_vs_WT	Emc10	-0.144507	0.000158688	0.00896642	7477.75	6137
AETAm_vs_WT	Cobll1	0.292774	0.000163843	0.00922498	743.25	827.25
AETAm_vs_WT	Sec16a	0.158389	0.000164469	0.00922764	3736.5	3758.75
AETAm_vs_WT	Mapk4	0.27325	0.000166604	0.0093146	2388.5	2618.75
AETAm_vs_WT	Msi2	0.148525	0.000167421	0.00932757	5328.5	5367.75
AETAm_vs_WT	Erlin2	0.2089	0.000170132	0.00944557	2746	2870.25
AETAm_vs_WT	Tnpo1	0.232129	0.000170941	0.00945755	3449.75	3677.75
AETAm_vs_WT	Ndrg2	-0.131727	0.000174016	0.00956125	25195	20965
AETAm_vs_WT	Dock7	0.232315	0.000173542	0.00956125	1832.5	1943.25
AETAm_vs_WT	Rai14	0.532191	0.000174884	0.00957593	330.5	438
AETAm_vs_WT	Bag6	-0.0954569	0.000175636	0.0095842	10225.5	8667.75
AETAm_vs_WT	Gabbr2	-0.10102	0.000178992	0.00973399	15756.8	13290
AETAm_vs_WT	Soga1	0.41777	0.000181729	0.00984924	1297.75	1562.25
AETAm_vs_WT	Rassf8	0.272279	0.000183668	0.00992054	1033.75	1124.25
AETAm_vs_WT	Myo7a	0.669762	0.000188963	0.0101721	1096	1578.5
AETAm_vs_WT	Phip	0.239087	0.000190407	0.0102153	2688.25	2870.5
AETAm_vs_WT	Pkn2	0.203516	0.000193395	0.0102218	1349.75	1405.5
AETAm_vs_WT	Tle3	0.139683	0.00019304	0.0102218	2395.5	2389.75
AETAm_vs_WT	Ooep	1.78778	0.000194377	0.0102218	12	38
AETAm_vs_WT	Fsd1l	0.216982	0.000194066	0.0102218	1775.25	1864.5
AETAm_vs_WT	Ano6	0.227436	0.000193495	0.0102218	1265.75	1337
AETAm_vs_WT	Naaladl2	0.615001	0.000194143	0.0102218	100.5	139.5
AETAm_vs_WT	N4bp2	0.311463	0.000201214	0.0105465	645	724.75
AETAm_vs_WT	Spag16	0.940894	0.000202342	0.0105709	84	146.5
AETAm_vs_WT	Thra	-0.0855967	0.000203757	0.01061	35121.2	29953
AETAm_vs_WT	Plscr2	0.817573	0.000205318	0.0106565	53	86
AETAm_vs_WT	Gm21986	0.584539	0.000207986	0.0107599	255.25	347.5
AETAm_vs_WT	Abcc4	0.373358	0.000211358	0.010899	579.75	682
AETAm_vs_WT	Frem1	1.08785	0.000215974	0.0111011	287	557.25
AETAm_vs_WT	Tcea3	1.35307	0.000218796	0.01121	27.5	62.75
AETAm_vs_WT	Hrk	-0.187905	0.000220801	0.0112764	2825.25	2242.25
AETAm_vs_WT	Wwp1	0.183488	0.000227355	0.0115005	1694.25	1741.5
AETAm_vs_WT	Cndp1	1.5395	0.000226544	0.0115005	25.25	66.5
AETAm_vs_WT	Hs6st2	0.318382	0.000227112	0.0115005	1308	1483.25
AETAm_vs_WT	Dio3	-0.510773	0.000230038	0.0115995	325.75	207.5
AETAm_vs_WT	Cd82	0.388695	0.00023168	0.0116454	822.5	968.75
AETAm_vs_WT	Pdxp	-0.130934	0.000233094	0.0116796	5759.25	4769
AETAm_vs_WT	Kcnh1	0.168936	0.000235485	0.0117624	2603.25	2638
AETAm_vs_WT	Hipk1	0.1435	0.000237964	0.0118491	6557.25	6541.25
AETAm_vs_WT	Pcolce2	0.697715	0.000239923	0.0119094	295.5	438
AETAm_vs_WT	Zfp516	0.210698	0.000241595	0.0119552	906	951
AETAm_vs_WT	Ppfibp2	0.594767	0.000246239	0.0121473	484.75	665
AETAm_vs_WT	Syn2	-0.10619	0.000250965	0.0123422	32617.5	27443
AETAm_vs_WT	Nrsn1	-0.107745	0.000256925	0.0125965	10472.8	8811.25
AETAm_vs_WT	Nat14	-0.172419	0.000261869	0.0127995	2399.25	1931
AETAm_vs_WT	Cfap91	0.615084	0.000264695	0.012898	115.5	159.75
AETAm_vs_WT	Alpl	0.552137	0.000270959	0.013163	419.5	561.5
AETAm_vs_WT	Golgb1	0.203566	0.000273599	0.0132284	5447.75	5647.75
AETAm_vs_WT	Ep300	0.17348	0.000273966	0.0132284	4219.5	4307.75
AETAm_vs_WT	Ago2	0.133813	0.000276321	0.0132617	6332.5	6278.75
AETAm_vs_WT	Vamp8	0.585745	0.000275785	0.0132617	280.5	382.25
AETAm_vs_WT	Mccc1	0.270106	0.000277617	0.0132839	1217.25	1338.5
AETAm_vs_WT	Calm3	-0.0982637	0.000280218	0.0133683	64976.2	55074.5
AETAm_vs_WT	Bbx	0.217959	0.000286053	0.0135654	1610	1689.75
AETAm_vs_WT	Sowahc	0.873935	0.000285361	0.0135654	674	1124.25
AETAm_vs_WT	Col18a1	1.12543	0.000288941	0.0136617	296.25	601.75
AETAm_vs_WT	Steap2	1.21746	0.000290845	0.013669	552.75	1189.25
AETAm_vs_WT	Arap1	0.273114	0.000290146	0.013669	766.75	834.25
AETAm_vs_WT	Tmem59l	-0.12366	0.000293384	0.013669	9833.25	8189
AETAm_vs_WT	Fcho2	0.165843	0.000292166	0.013669	2355.5	2397.5
AETAm_vs_WT	Gm19500	0.599889	0.000293271	0.013669	195	266.75
AETAm_vs_WT	Nav2	0.123184	0.000295483	0.0137266	4268.75	4203.5
AETAm_vs_WT	Nrn1	-0.124384	0.000300081	0.0138997	8277	6867.25
AETAm_vs_WT	Exoc3l2	1.6937	0.000306503	0.014156	13.5	40.5
AETAm_vs_WT	Myrip	0.161675	0.000309475	0.014252	2810.25	2850.5
AETAm_vs_WT	Kat2b	0.26152	0.000311818	0.0142638	1074	1167.5
AETAm_vs_WT	Magt1	0.292902	0.000310915	0.0142638	760.5	846.5
AETAm_vs_WT	Ptpn13	0.252102	0.000312418	0.0142638	724	783.5
AETAm_vs_WT	C230072F16Rik	1.10949	0.000313767	0.0142845	28	52.75
AETAm_vs_WT	Ror1	0.316417	0.000314995	0.0142995	296	333.5
AETAm_vs_WT	Septin5	-0.140234	0.000329579	0.01488	21457.8	17665.2
AETAm_vs_WT	Gm44167	1.20624	0.000329649	0.01488	22.25	45.25
AETAm_vs_WT	Lrrk2	0.230009	0.000333622	0.0149745	1444.5	1533.5
AETAm_vs_WT	Tmcc2	-0.114872	0.000333097	0.0149745	10032.8	8397.5
AETAm_vs_WT	Hnrnpdl	-0.133826	0.000335736	0.015027	9268	7645.75
AETAm_vs_WT	Ywhah	-0.0865221	0.000336753	0.0150303	38598.5	32924.2
AETAm_vs_WT	Prkcq	0.429255	0.000342617	0.0152493	482	592.75
AETAm_vs_WT	Dbn1	-0.0999747	0.000345315	0.015284	14952	12642.8
AETAm_vs_WT	Lenep	-0.943739	0.000344777	0.015284	184.75	86.75
AETAm_vs_WT	Epdr1	-0.103474	0.000347371	0.0153324	5375.5	4526
AETAm_vs_WT	Arid5b	0.191167	0.000349787	0.0153964	2196.25	2276
AETAm_vs_WT	Lmx1a	1.47683	0.000353314	0.0155088	37.25	96
AETAm_vs_WT	Lrp11	-0.104291	0.000359357	0.0157308	9284	7804.25
AETAm_vs_WT	Ggt5	0.512673	0.000362402	0.0157779	129.5	169.25
AETAm_vs_WT	Baz2a	0.164175	0.000362413	0.0157779	4227.25	4273.75
AETAm_vs_WT	Cntnap1	-0.127858	0.000367145	0.0159403	14127.2	11741.8
AETAm_vs_WT	Sned1	0.686873	0.000373014	0.0161073	1035.25	1517.5
AETAm_vs_WT	Fmnl1	-0.137213	0.000372067	0.0161073	6477.5	5339.25
AETAm_vs_WT	Add1	-0.0698876	0.000376815	0.0161838	17904.5	15460.5
AETAm_vs_WT	Pkd1	0.190159	0.00037668	0.0161838	7042.25	7280.5
AETAm_vs_WT	Ahcyl2	0.166974	0.000378408	0.0162059	11073.8	11259.2
AETAm_vs_WT	Gng7	-0.100599	0.000379366	0.0162059	8232.25	6938
AETAm_vs_WT	Tbcel	0.202124	0.00038228	0.0162191	2864.75	2979.25
AETAm_vs_WT	Mmd2	-0.119935	0.000382729	0.0162191	7083.75	5890
AETAm_vs_WT	Fam189a2	0.36003	0.000381494	0.0162191	418	484.5
AETAm_vs_WT	Gulp1	0.629596	0.000392198	0.0165763	141.75	197.75
AETAm_vs_WT	Sgta	-0.129123	0.000401068	0.0166422	4505.75	3734.5
AETAm_vs_WT	Abca5	0.149575	0.000396554	0.0166422	2633	2643.5
AETAm_vs_WT	Phc3	0.19788	0.000397498	0.0166422	3376.25	3495.75
AETAm_vs_WT	Htr2c	0.727978	0.000400965	0.0166422	2296.5	3485.25
AETAm_vs_WT	Fam47e	1.20926	0.000399313	0.0166422	19	39.25
AETAm_vs_WT	Klhl24	0.158694	0.000400714	0.0166422	3918.5	3951.75
AETAm_vs_WT	Syna	-0.387602	0.000397992	0.0166422	309	214.5
AETAm_vs_WT	Ensa	-0.0890291	0.00040777	0.0168764	11512.2	9814.5
AETAm_vs_WT	Uhrf1bp1	0.246275	0.000409245	0.0168935	954.5	1015.75
AETAm_vs_WT	Slc17a7	-0.0930032	0.000412309	0.016976	61309	51842.8
AETAm_vs_WT	Kif9	0.550842	0.000416714	0.0170692	244	325.5
AETAm_vs_WT	Gm21984	-0.276996	0.000415698	0.0170692	548.25	409.75
AETAm_vs_WT	Dalrd3	-0.182125	0.000424007	0.017235	2818.25	2261.75
AETAm_vs_WT	Pag1	0.213045	0.000422323	0.017235	1495	1566
AETAm_vs_WT	Tjp3	1.1161	0.000423922	0.017235	86	173
AETAm_vs_WT	Nsf	-0.101392	0.000426434	0.0172803	51468.8	43380.8
AETAm_vs_WT	Kdm7a	0.228109	0.000427289	0.0172803	4164.25	4400.75
AETAm_vs_WT	Cep290	0.282511	0.000429429	0.0172919	691.25	759.75
AETAm_vs_WT	Lrrc58	0.151794	0.000429747	0.0172919	5107.5	5150.5
AETAm_vs_WT	Pde5a	0.299219	0.000443317	0.0177841	541.5	605.75
AETAm_vs_WT	Ighm	-0.389651	0.000444212	0.0177841	818.75	561.25
AETAm_vs_WT	Tspan13	-0.091622	0.000450588	0.0179429	9763.5	8305.25
AETAm_vs_WT	Bex2	-0.122634	0.000451557	0.0179429	6868.25	5702.5
AETAm_vs_WT	Parp4	0.351145	0.000451424	0.0179429	468	541.75
AETAm_vs_WT	Il6st	0.149229	0.000457132	0.0181192	3843.5	3872.25
AETAm_vs_WT	Tln1	0.198845	0.000460707	0.0182108	2661	2771.75
AETAm_vs_WT	Tbc1d2b	0.239912	0.000461727	0.0182108	629.75	674.25
AETAm_vs_WT	Plaat3	0.222021	0.000467592	0.0183966	1462.75	1542.5
AETAm_vs_WT	Rtn1	-0.101809	0.000473022	0.0185188	43949.5	37127
AETAm_vs_WT	Map1lc3b	-0.122086	0.000472405	0.0185188	7832.5	6544.75
AETAm_vs_WT	Cspg5	-0.0919165	0.000476849	0.0186228	9417	8010.5
AETAm_vs_WT	Erbin	0.189709	0.000484429	0.0188266	4292.5	4402.25
AETAm_vs_WT	Chd6	0.195012	0.000484043	0.0188266	3824.75	3956
AETAm_vs_WT	Ubn2	0.173962	0.000487303	0.0188922	2919.5	2977.75
AETAm_vs_WT	Fscn1	-0.130179	0.000489578	0.0189343	6915.75	5710.5
AETAm_vs_WT	Ndufa10	-0.0913405	0.000492054	0.018984	5398.5	4589.5
AETAm_vs_WT	Usp9x	0.150035	0.000494097	0.0190168	12116	12147.5
AETAm_vs_WT	Cpeb3	0.152125	0.000496268	0.0190425	3243.25	3265.5
AETAm_vs_WT	Ralyl	-0.147588	0.000497157	0.0190425	2396.25	1959.5
AETAm_vs_WT	Crhr2	0.855126	0.000502208	0.0191899	128	210.5
AETAm_vs_WT	Syne2	0.274593	0.00050874	0.019393	1286.25	1415.5
AETAm_vs_WT	Trip12	0.16475	0.000512028	0.0194254	8920.25	9026.75
AETAm_vs_WT	Saraf	-0.0874579	0.000511871	0.0194254	8529.5	7268.5
AETAm_vs_WT	Fam8a1	-0.0961425	0.00051661	0.0195526	5390.75	4568.25
AETAm_vs_WT	Cyp2j9	-0.20219	0.000521265	0.0196061	969.25	765.75
AETAm_vs_WT	Elovl7	0.751508	0.000520759	0.0196061	731.5	1130.75
AETAm_vs_WT	Gstm2	1.03156	0.000521714	0.0196061	67.5	128
AETAm_vs_WT	Clock	0.14941	0.000534532	0.0200405	4297	4301
AETAm_vs_WT	Frrs1	0.783446	0.000537064	0.0200882	127.75	197.25
AETAm_vs_WT	Rs1	1.53617	0.00054026	0.0201604	17	45.5
AETAm_vs_WT	Dnah7b	0.503831	0.000551396	0.0205279	229.5	290.75
AETAm_vs_WT	Nptxr	-0.129354	0.000553715	0.0205662	54520.8	45037
AETAm_vs_WT	Tulp4	0.176429	0.000558263	0.0206796	8330.75	8511.5
AETAm_vs_WT	Adam17	0.234159	0.000559365	0.0206796	763	810
AETAm_vs_WT	Luzp1	0.167628	0.00056703	0.0207226	5452.5	5546.5
AETAm_vs_WT	Prkar1b	-0.0993152	0.000565889	0.0207226	20843	17651.8
AETAm_vs_WT	Vps37a	0.118902	0.000564346	0.0207226	2692.5	2648
AETAm_vs_WT	Grik4	-0.166357	0.00056488	0.0207226	2817	2268.5
AETAm_vs_WT	Cfap65	0.827078	0.000563507	0.0207226	575.25	926
AETAm_vs_WT	Aloxe3	-0.32177	0.000569043	0.0207486	612.25	445
AETAm_vs_WT	Crtc1	-0.0905274	0.000570948	0.0207705	15366.5	13082.8
AETAm_vs_WT	Sez6l2	-0.108209	0.000573782	0.0208261	20677.5	17362.2
AETAm_vs_WT	Cachd1	0.217502	0.000580463	0.0210067	2297.25	2422.5
AETAm_vs_WT	Dscaml1	-0.134309	0.000581395	0.0210067	6072	5006
AETAm_vs_WT	Cd59a	1.10951	0.000585251	0.0210982	228.5	456.25
AETAm_vs_WT	Ern1	0.241747	0.000587324	0.0211251	704	754.75
AETAm_vs_WT	Faim2	-0.113125	0.000596022	0.0213297	22356.2	18783.2
AETAm_vs_WT	Syn1	-0.092579	0.000596735	0.0213297	27335.2	23261.2
AETAm_vs_WT	Dock1	0.173928	0.000597028	0.0213297	1630	1665.5
AETAm_vs_WT	Clptm1l	-0.113352	0.000599529	0.0213711	3941.75	3300.25
AETAm_vs_WT	Atxn1l	0.148203	0.000602141	0.0214163	2291.25	2299.5
AETAm_vs_WT	Col4a5	0.594976	0.000603813	0.0214241	290	400.25
AETAm_vs_WT	Six3os1	1.74118	0.000605048	0.0214241	49	150.5
AETAm_vs_WT	Itpripl1	0.971244	0.000608475	0.0214977	110.75	200.75
AETAm_vs_WT	Rnaset2b	0.307838	0.000611742	0.0215653	900.25	1019.25
AETAm_vs_WT	Trpm7	0.17565	0.000613366	0.0215748	2686.25	2740
AETAm_vs_WT	Ago3	0.137933	0.000619469	0.0216461	3198.25	3188.5
AETAm_vs_WT	Dgki	0.311518	0.000619417	0.0216461	628.25	701
AETAm_vs_WT	Fbll1	-0.206964	0.000617887	0.0216461	995	782.75
AETAm_vs_WT	Sgk3	0.476919	0.000624489	0.0217262	548.25	690
AETAm_vs_WT	Dnaaf3	0.739981	0.000624429	0.0217262	73.5	109.25
AETAm_vs_WT	Dpf1	-0.158801	0.000626843	0.0217606	2482.25	2010.5
AETAm_vs_WT	C2cd3	0.149757	0.000628379	0.0217665	1633	1639.5
AETAm_vs_WT	Slco1a5	2.02795	0.00062987	0.0217708	12.5	46.75
AETAm_vs_WT	Btd	0.342149	0.000636041	0.0219365	360.75	414.75
AETAm_vs_WT	Gstm1	-0.156192	0.000638294	0.0219474	7128.5	5810.5
AETAm_vs_WT	Gm47171	1.18833	0.000639112	0.0219474	55.75	119.5
AETAm_vs_WT	Dot1l	0.101783	0.000641237	0.021973	5377.25	5223.5
AETAm_vs_WT	Arid1a	0.089698	0.000647455	0.0221385	7895.75	7598.75
AETAm_vs_WT	Elmo3	1.09947	0.000653507	0.0222976	57	110.25
AETAm_vs_WT	Ankrd12	0.194571	0.000657287	0.0223775	3421.75	3521.25
AETAm_vs_WT	Kif13b	0.185015	0.000658659	0.0223775	2674.25	2732.5
AETAm_vs_WT	Cab39l	0.80707	0.000661365	0.0224	1610	2562.25
AETAm_vs_WT	Myo10	0.272658	0.000662131	0.0224	2230.75	2434.75
AETAm_vs_WT	Pih1d2	0.719308	0.000669193	0.0225909	64.5	95.5
AETAm_vs_WT	Slc24a4	0.254099	0.000680197	0.0229139	1325.25	1426.5
AETAm_vs_WT	Rsf1	0.165349	0.000681968	0.0229251	2815.25	2841
AETAm_vs_WT	Deptor	0.426345	0.000686646	0.0230337	719	878.75
AETAm_vs_WT	Rab15	-0.0987536	0.000692249	0.0231243	8686	7364.5
AETAm_vs_WT	Itga1	0.283843	0.00069156	0.0231243	502.25	554
AETAm_vs_WT	H1f10	-0.236747	0.000694519	0.0231516	1427	1102.25
AETAm_vs_WT	Patj	0.630474	0.000697271	0.0231948	237.75	333.75
AETAm_vs_WT	Dpp9	-0.133847	0.000711069	0.023243	3577.5	2960.25
AETAm_vs_WT	Pank3	0.180321	0.000704698	0.023243	3313.5	3408
AETAm_vs_WT	Cnot2	-0.120967	0.000710903	0.023243	2717.5	2261.75
AETAm_vs_WT	Clmn	0.175963	0.000711513	0.023243	7403	7549.25
AETAm_vs_WT	Man2a1	0.199468	0.000711848	0.023243	1093.5	1136.75
AETAm_vs_WT	Ncoa3	0.170947	0.000708868	0.023243	2633	2678.75
AETAm_vs_WT	Slc8a2	-0.100112	0.00070794	0.023243	20165.8	17005.8
AETAm_vs_WT	Sgms1	0.204746	0.000707705	0.023243	1758.25	1832
AETAm_vs_WT	Nbeal1	0.235503	0.000705106	0.023243	1130.5	1210
AETAm_vs_WT	Nqo1	0.615969	0.000716932	0.0232443	152.25	210.25
AETAm_vs_WT	Synm	0.167578	0.000717722	0.0232443	2917.5	2951.25
AETAm_vs_WT	Icam5	-0.128604	0.000715408	0.0232443	13973	11516.8
AETAm_vs_WT	Ptprf	0.148563	0.000713439	0.0232443	3188.75	3195.75
AETAm_vs_WT	Traf3ip2	0.805477	0.000741605	0.0237284	39	60.75
AETAm_vs_WT	Nipbl	0.212114	0.000736482	0.0237284	2562.75	2673.25
AETAm_vs_WT	Stmn3	-0.101558	0.000741388	0.0237284	11093.5	9367.5
AETAm_vs_WT	Cfap61	0.707708	0.000740689	0.0237284	99	147.25
AETAm_vs_WT	Tspyl5	-0.144436	0.000739989	0.0237284	2152.75	1768.75
AETAm_vs_WT	AI506816	0.456063	0.000737167	0.0237284	178.25	221.25
AETAm_vs_WT	Phyhip	-0.0948591	0.000754321	0.0240387	26761	22638.2
AETAm_vs_WT	Cpt2	0.485159	0.000753487	0.0240387	215.25	273
AETAm_vs_WT	Chn1	-0.0810107	0.00075866	0.0241287	44547.2	38099.5
AETAm_vs_WT	Cnot6	0.131858	0.000760577	0.0241415	2666	2644.25
AETAm_vs_WT	Gm37607	-0.411312	0.000765663	0.0242546	266.75	180.75
AETAm_vs_WT	Numb	0.15175	0.00076745	0.024263	1382.75	1392
AETAm_vs_WT	Nhs	0.545518	0.000770785	0.0243202	191	250.75
AETAm_vs_WT	Camk2b	-0.0986101	0.000773068	0.024344	60366.8	50876.5
AETAm_vs_WT	Chst1	-0.0978446	0.000777606	0.0244143	12146.5	10258
AETAm_vs_WT	Eif5a	-0.0885883	0.000778363	0.0244143	9482.5	8077
AETAm_vs_WT	Psd	-0.0952716	0.000780863	0.0244445	22671.5	19152.5
AETAm_vs_WT	Rps29	-0.126832	0.000788528	0.0246361	6077.25	5048.75
AETAm_vs_WT	Mapre1	0.12257	0.000792941	0.0246772	3481.75	3420
AETAm_vs_WT	Slco1c1	0.534136	0.00079221	0.0246772	2279.5	3013.5
AETAm_vs_WT	Jmy	0.171875	0.00079787	0.024734	2892.25	2938.75
AETAm_vs_WT	Lamc3	0.358855	0.000796909	0.024734	360.75	423.75
AETAm_vs_WT	Pla2g7	-0.132309	0.000805696	0.0249281	5820.25	4815.25
AETAm_vs_WT	Cept1	-0.151323	0.000820433	0.0253348	1501.25	1224.25
AETAm_vs_WT	Lrrc8c	0.189512	0.000822074	0.0253364	1478.25	1515.75
AETAm_vs_WT	Dnajc13	0.196011	0.000829727	0.0255229	2970	3060.5
AETAm_vs_WT	Nynrin	0.274818	0.000831406	0.0255253	695	764.25
AETAm_vs_WT	Fzd5	0.597582	0.000833122	0.0255288	74.5	102.75
AETAm_vs_WT	Alkbh5	0.141742	0.000838107	0.025625	3128.75	3122
AETAm_vs_WT	Basp1	-0.118802	0.000839478	0.025625	18374.8	15325.2
AETAm_vs_WT	Atrx	0.192716	0.000843751	0.0257062	8094.75	8349.75
AETAm_vs_WT	Cxadr	0.217452	0.000848825	0.0257299	1145.75	1214.5
AETAm_vs_WT	Iqcd	0.818733	0.000849375	0.0257299	50.5	80.5
AETAm_vs_WT	Plvap	0.343961	0.000846681	0.0257299	329.75	380
AETAm_vs_WT	Nhsl2	0.161316	0.000851512	0.0257457	4420.25	4467.25
AETAm_vs_WT	Mpp7	0.62681	0.000857359	0.0258245	179.5	252
AETAm_vs_WT	Adgrv1	0.77891	0.000856401	0.0258245	89	133.5
AETAm_vs_WT	Cacnb3	-0.104832	0.000859936	0.0258339	9034.75	7593.25
AETAm_vs_WT	Arl8b	-0.0869767	0.000860914	0.0258339	10041.8	8563.5
AETAm_vs_WT	Ednrb	0.272009	0.000864336	0.025884	1801.5	1947.5
AETAm_vs_WT	Syt13	-0.127572	0.000865833	0.025884	9848.5	8158
AETAm_vs_WT	Mr1	0.375433	0.000874829	0.026104	265.75	312.25
AETAm_vs_WT	Kirrel	0.387449	0.000877001	0.0261199	348.5	411
AETAm_vs_WT	Srrm2	0.155451	0.000879353	0.0261411	36514.5	36841.8
AETAm_vs_WT	C1qa	-0.191167	0.000882262	0.0261787	1524	1211
AETAm_vs_WT	Pds5a	0.135859	0.000885029	0.0262097	3220.75	3202.75
AETAm_vs_WT	Cpeb2	0.14404	0.000886598	0.0262097	3274.5	3293
AETAm_vs_WT	Cgnl1	1.12385	0.000895194	0.0263174	1010.25	2032
AETAm_vs_WT	Scube3	1.30122	0.000893769	0.0263174	163.5	369.25
AETAm_vs_WT	Ttc12	0.548397	0.000893833	0.0263174	101.5	133.25
AETAm_vs_WT	Chrd	-0.133939	0.0009058	0.0265801	4674	3857.75
AETAm_vs_WT	Sdc3	-0.100129	0.000908357	0.0266062	10371.2	8754.25
AETAm_vs_WT	Zic4	1.20101	0.00091073	0.0266267	135.25	281.5
AETAm_vs_WT	Nin	0.21418	0.000923258	0.0268956	2827.75	2949
AETAm_vs_WT	Efemp2	0.422315	0.000927658	0.0268956	353	432.25
AETAm_vs_WT	Acot7	-0.116972	0.000928367	0.0268956	8654.5	7243
AETAm_vs_WT	Tmem98	0.557781	0.000927192	0.0268956	423.75	568
AETAm_vs_WT	1810020O05Rik	0.523934	0.000925829	0.0268956	102.5	132.5
AETAm_vs_WT	Ubl4a	-0.125923	0.000935805	0.0270579	2416.25	2002.25
AETAm_vs_WT	Rassf9	0.621992	0.000937365	0.0270579	103.25	144.5
AETAm_vs_WT	Atf6b	-0.141035	0.000939888	0.0270817	3337.25	2743.5
AETAm_vs_WT	Abhd2	0.473267	0.000943914	0.0271263	5901.5	7469.75
AETAm_vs_WT	Camta2	-0.0741467	0.000944842	0.0271263	22358.8	19216.2
AETAm_vs_WT	Cyyr1	0.29579	0.000949683	0.0271674	334.25	371
AETAm_vs_WT	Gm3883	-8.49249	0.000949202	0.0271674	75.5	0
AETAm_vs_WT	Mak	0.52648	0.000953729	0.0272071	120.25	158
AETAm_vs_WT	Gm33989	0.191175	0.000954486	0.0272071	1262.25	1303.25
AETAm_vs_WT	Trim9	-0.0789991	0.000968073	0.0275451	14441.5	12390.5
AETAm_vs_WT	Lgals3	0.883367	0.000972921	0.0276337	39.25	65
AETAm_vs_WT	Inka2	-0.105093	0.000979784	0.0277791	4599.25	3873.75
AETAm_vs_WT	Pcdhga4	-0.227443	0.000982737	0.0278134	1123.75	867.75
AETAm_vs_WT	Bptf	0.174766	0.000986732	0.0278769	6001	6111.75
AETAm_vs_WT	Ppp1r1b	0.599553	0.000989973	0.027919	1956.25	2690.5
AETAm_vs_WT	Inmt	1.34657	0.000995619	0.0280286	29.25	69.75
AETAm_vs_WT	Cplx1	-0.108128	0.00100144	0.0280931	20610.8	17325
AETAm_vs_WT	4932438H23Rik	0.748576	0.00100002	0.0280931	61.5	93.25
AETAm_vs_WT	Lhb.1	1.04845	0.00101541	0.028435	45.5	85.5
AETAm_vs_WT	Ap1s2	0.190586	0.00102083	0.0285368	1723.75	1790.5
AETAm_vs_WT	Kirrel3	-0.170382	0.00102789	0.0286837	2179.5	1747
AETAm_vs_WT	Cops6	-0.132657	0.00103008	0.0286875	3039	2507
AETAm_vs_WT	Ankib1	0.162472	0.00103315	0.0286875	2641.5	2670.25
AETAm_vs_WT	Ddx17	0.117758	0.00103343	0.0286875	20255	19833.5
AETAm_vs_WT	Ssh2	0.181521	0.00103933	0.0288012	2164.5	2219.75
AETAm_vs_WT	Aebp2	0.113117	0.00105444	0.0291454	3292.5	3225.75
AETAm_vs_WT	Ldlrap1	0.477422	0.00105541	0.0291454	150	189.5
AETAm_vs_WT	Erich2	1.05783	0.00106587	0.0293834	29.75	56.25
AETAm_vs_WT	Adra1d	-0.14823	0.00106935	0.0294282	2146.5	1752
AETAm_vs_WT	Sec14l4	0.779167	0.00108383	0.029722	35	54.5
AETAm_vs_WT	H2-Eb1	1.1849	0.00108333	0.029722	55.75	114.25
AETAm_vs_WT	Btbd3	-0.149137	0.00108562	0.029722	11632	9514.25
AETAm_vs_WT	Scrn3	-0.172434	0.00109163	0.0298039	1686.75	1363
AETAm_vs_WT	Crtac1	-0.142555	0.00109235	0.0298039	4463	3666
AETAm_vs_WT	Gm50253	0.345245	0.00109455	0.029813	279.5	318.5
AETAm_vs_WT	Ptch1	0.213308	0.00110759	0.0301165	2489	2624.25
AETAm_vs_WT	Nme1	-0.117383	0.00111075	0.0301512	3069.75	2562.25
AETAm_vs_WT	Aars2	-0.160561	0.00111775	0.0302894	1373.5	1114.25
AETAm_vs_WT	Slc25a23	-0.081088	0.0011208	0.0303206	21201.5	18169.5
AETAm_vs_WT	Acsbg1	-0.145939	0.00113896	0.0306053	5007	4125
AETAm_vs_WT	Ucp2	0.802456	0.00113345	0.0306053	822.5	1306.75
AETAm_vs_WT	Psme4	0.147188	0.00113768	0.0306053	2214.25	2212.25
AETAm_vs_WT	Trim56	0.339824	0.00113901	0.0306053	546.5	627.75
AETAm_vs_WT	Prkaa2	0.220322	0.00114192	0.030632	1534.75	1621.5
AETAm_vs_WT	Arhgef3	0.0953153	0.00114557	0.0306781	3949.75	3817.5
AETAm_vs_WT	Spock1	-0.0910502	0.00116633	0.0311818	12337.8	10474.5
AETAm_vs_WT	Pfkl	-0.095731	0.00117169	0.0312726	10649.5	9005.5
AETAm_vs_WT	Smc6	0.142936	0.00118113	0.0314191	1784.25	1779.25
AETAm_vs_WT	Zfp941	-0.254169	0.00118027	0.0314191	1052.5	802.75
AETAm_vs_WT	Baalc	-0.112254	0.00119634	0.0317707	6918.25	5795.5
AETAm_vs_WT	Rasl10b	-0.0887112	0.00119838	0.031772	9994	8506.5
AETAm_vs_WT	Tekt1	0.692142	0.00122743	0.032488	112.75	163.75
AETAm_vs_WT	Camkk1	-0.122466	0.00123188	0.0325434	10034.8	8326.5
AETAm_vs_WT	Slc4a8	0.147169	0.0012336	0.0325434	5492.25	5507.5
AETAm_vs_WT	Fam107a	-0.165173	0.00123695	0.0325777	15119.2	12322.5
AETAm_vs_WT	Ubqln4	-0.12297	0.00125279	0.0329405	5670	4730
AETAm_vs_WT	P4ha2	0.231517	0.00126911	0.0332523	699.5	746
AETAm_vs_WT	Spag6l	0.390608	0.00127091	0.0332523	254.5	298.25
AETAm_vs_WT	Atp2b4	0.230875	0.00126971	0.0332523	6100	6513.25
AETAm_vs_WT	Tbl1x	0.140783	0.00128338	0.0333838	2296	2293.25
AETAm_vs_WT	Sh3pxd2b	0.197356	0.00127983	0.0333838	913.75	947.75
AETAm_vs_WT	Pqlc3	0.92466	0.00128431	0.0333838	40.25	70
AETAm_vs_WT	Dpp6	-0.0809193	0.00128318	0.0333838	17922	15334
AETAm_vs_WT	Smg1	0.105974	0.00128842	0.0334361	7844.75	7649.25
AETAm_vs_WT	Zfp467	0.241208	0.00129322	0.0335059	744	790.75
AETAm_vs_WT	Slc16a4	0.784551	0.00129645	0.0335352	88.75	139.25
AETAm_vs_WT	Ugdh	0.160801	0.00129964	0.0335633	1204	1214.75
AETAm_vs_WT	Rsph9	0.271813	0.00130218	0.0335742	382.75	416.75
AETAm_vs_WT	Dab2	0.959779	0.00130719	0.033649	469.25	848.25
AETAm_vs_WT	Ahctf1	0.168492	0.00131666	0.0338381	2836.75	2871.5
AETAm_vs_WT	Dennd5b	0.17875	0.00131955	0.0338389	3359	3439.75
AETAm_vs_WT	Pgbd5	-0.121862	0.00132093	0.0338389	9037	7509
AETAm_vs_WT	Adam11	-0.109531	0.00132306	0.033839	12656.8	10604.8
AETAm_vs_WT	Rundc3a	-0.0967131	0.00133591	0.0340216	11321.5	9588.5
AETAm_vs_WT	Tbc1d2	0.64063	0.00133601	0.0340216	282.25	403.5
AETAm_vs_WT	Ecpas	0.14587	0.00133661	0.0340216	4793.25	4791.5
AETAm_vs_WT	Neurl1a	-0.0945682	0.00134858	0.034217	8923.25	7563
AETAm_vs_WT	Cfap53	1.11171	0.00134732	0.034217	17	34
AETAm_vs_WT	Matk	-0.0963555	0.00135301	0.0342749	8429	7134.25
AETAm_vs_WT	Sh3d19	0.534499	0.00136116	0.0344266	1493.75	1966
AETAm_vs_WT	Gm14326	0.294439	0.00136795	0.0345435	609.25	667.5
AETAm_vs_WT	Msn	0.18334	0.0013901	0.0349715	1340	1377.5
AETAm_vs_WT	Rfx7	0.163452	0.00139282	0.0349715	1902.25	1918.25
AETAm_vs_WT	Zfp52	0.302206	0.00139368	0.0349715	248.5	278
AETAm_vs_WT	Eef1g	-0.0868457	0.00138742	0.0349715	8271.5	7054.75
AETAm_vs_WT	Slc16a6	0.365589	0.00139971	0.0350675	771.25	905.75
AETAm_vs_WT	Zfhx3	0.601942	0.00140297	0.0350941	261.75	359
AETAm_vs_WT	Clstn2	-0.133388	0.00142063	0.0353694	6030	4986.75
AETAm_vs_WT	Trim46	-0.108056	0.00142064	0.0353694	4044.75	3401.5
AETAm_vs_WT	Rmst	0.531819	0.00141763	0.0353694	91	118.5
AETAm_vs_WT	Shfl	-0.106645	0.0014297	0.0355396	4286.75	3617.25
AETAm_vs_WT	Chdh	0.75694	0.00145187	0.0359783	405.75	617
AETAm_vs_WT	Lynx1	-0.102466	0.0014504	0.0359783	15658.8	13210.2
AETAm_vs_WT	Cx3cl1	-0.100047	0.00146696	0.0360717	25434	21561.8
AETAm_vs_WT	Baiap2l1	1.38327	0.00146521	0.0360717	81.25	194.75
AETAm_vs_WT	Ezr	0.423095	0.00146155	0.0360717	2667	3251
AETAm_vs_WT	Irs1	0.188854	0.00146142	0.0360717	1092	1130.5
AETAm_vs_WT	Intu	0.282744	0.00146615	0.0360717	616.5	682.75
AETAm_vs_WT	Cd164	0.243308	0.00147757	0.0362768	2921.25	3157.5
AETAm_vs_WT	Atg2b	0.188632	0.00148348	0.0363131	2359.75	2424
AETAm_vs_WT	A330076C08Rik	-0.773703	0.00148361	0.0363131	56.5	30.25
AETAm_vs_WT	Ccdc102a	0.667264	0.00148642	0.0363261	61	87.5
AETAm_vs_WT	Snap25	-0.0759228	0.00149268	0.0364231	87173.8	74982.8
AETAm_vs_WT	Zfp236	0.145726	0.00149562	0.0364391	2299	2297.5
AETAm_vs_WT	Cald1	0.172772	0.00150313	0.0365104	1983.25	2023.5
AETAm_vs_WT	Gm37570	0.688034	0.00150144	0.0365104	51.25	73.5
AETAm_vs_WT	Nav3	0.240106	0.00150595	0.0365233	3082.5	3288.25
AETAm_vs_WT	Slk	0.161893	0.00151344	0.0365433	5099	5149.75
AETAm_vs_WT	Ccp110	0.130535	0.00151157	0.0365433	3641.75	3598.5
AETAm_vs_WT	Cnnm2	0.165871	0.00151366	0.0365433	1476	1499.75
AETAm_vs_WT	Cdc37l1	0.108677	0.00152834	0.0368178	5471.75	5340.75
AETAm_vs_WT	BC034090	0.361983	0.00153196	0.0368178	379.5	444.5
AETAm_vs_WT	Hipk2	0.677474	0.00153177	0.0368178	1013.25	1464
AETAm_vs_WT	Btaf1	0.284667	0.00153926	0.0369377	2220.25	2445.5
AETAm_vs_WT	Ccdc50	0.149232	0.00156057	0.0373927	2672.25	2678.75
AETAm_vs_WT	Phf3	0.119866	0.00156623	0.0374719	4430.5	4351.25
AETAm_vs_WT	Snap23	0.275995	0.0015782	0.0375891	595	651.75
AETAm_vs_WT	Gpc1	-0.103767	0.00157637	0.0375891	6154.5	5182.5
AETAm_vs_WT	Msx1	1.16496	0.00157772	0.0375891	304.5	619.75
AETAm_vs_WT	Ubr5	0.182347	0.0015852	0.0376994	7801.75	7949.75
AETAm_vs_WT	Khdrbs3	-0.116601	0.00160255	0.0380553	6726.5	5637.25
AETAm_vs_WT	Adh1	1.48221	0.00160607	0.038082	14.25	37
AETAm_vs_WT	Rac1	-0.0684769	0.00161175	0.0381599	13279	11452.8
AETAm_vs_WT	Itih5	0.238049	0.00163041	0.0385444	1454	1555.5
AETAm_vs_WT	Loxl2	0.932604	0.00163283	0.0385445	53.75	94.25
AETAm_vs_WT	Atp1a3	-0.0792901	0.00165256	0.0389525	138762	118943
AETAm_vs_WT	Actg1	-0.0954545	0.00166357	0.0391542	40632.5	34320.8
AETAm_vs_WT	Fnbp1l	0.243383	0.00167502	0.0393655	2220.75	2409
AETAm_vs_WT	Fam107b	0.282414	0.0016787	0.0393938	571.75	628
AETAm_vs_WT	Tagln3	-0.119599	0.00168133	0.0393976	5702	4754.25
AETAm_vs_WT	Lhx2	-0.144901	0.00170598	0.0398743	2838.75	2328.25
AETAm_vs_WT	Bad	0.27705	0.00171419	0.0398743	708.5	779.75
AETAm_vs_WT	Cd55	0.506865	0.00171262	0.0398743	259	335.5
AETAm_vs_WT	Vwa5b1	1.02848	0.00171184	0.0398743	233.5	426.75
AETAm_vs_WT	Ston1	0.379819	0.00171015	0.0398743	200.5	235
AETAm_vs_WT	Fam234b	-0.0959485	0.00171777	0.0398994	10938.8	9284.25
AETAm_vs_WT	Aldoa	-0.0668312	0.00172805	0.0400796	64976	56046.8
AETAm_vs_WT	Tmx1	0.156028	0.00173301	0.040104	1687	1703
AETAm_vs_WT	Gm38020	0.479251	0.00173413	0.040104	502.25	631.25
AETAm_vs_WT	Smurf2	0.155692	0.00174386	0.0402706	1586	1601.25
AETAm_vs_WT	Slc25a22	-0.0908705	0.00174975	0.0403322	11840.8	10057.8
AETAm_vs_WT	Asphd2	-0.116191	0.00175159	0.0403322	4618.75	3842.75
AETAm_vs_WT	Cck	-0.13617	0.00175427	0.0403356	7730.75	6389.5
AETAm_vs_WT	Napa	-0.0857715	0.00176611	0.0403747	8814.5	7523
AETAm_vs_WT	Palm	-0.0904822	0.00176056	0.0403747	8660.25	7373
AETAm_vs_WT	Prdm11	0.347297	0.00176545	0.0403747	367.75	421.25
AETAm_vs_WT	Gm19439	0.450301	0.00176113	0.0403747	190	236
AETAm_vs_WT	Arhgap33	-0.133123	0.00177096	0.0404277	6433.75	5338.25
AETAm_vs_WT	Lrrn2	-0.0925605	0.00177856	0.0405431	10204.5	8653.5
AETAm_vs_WT	Zfp966	0.323835	0.00178631	0.0406615	493.25	560
AETAm_vs_WT	Igf1r	0.13126	0.00180414	0.0409002	3769	3735.5
AETAm_vs_WT	Cd9	0.24458	0.00180239	0.0409002	1348.5	1448.75
AETAm_vs_WT	Gm36989	0.588578	0.0018045	0.0409002	154.5	210.75
AETAm_vs_WT	Kdm5c	0.133402	0.00181243	0.0410216	3487.75	3464.25
AETAm_vs_WT	Lratd2	0.266591	0.00183784	0.0415378	1073	1174.75
AETAm_vs_WT	Abcg4	-0.100057	0.00184166	0.0415501	3497.75	2959.5
AETAm_vs_WT	Sod3	0.40463	0.0018436	0.0415501	543.5	662.75
AETAm_vs_WT	Man2b2	0.223373	0.00184751	0.0415794	1295.25	1369
AETAm_vs_WT	Timp3	0.430348	0.00186667	0.0418974	4269.75	5276.25
AETAm_vs_WT	Ccdc80	0.430553	0.0018669	0.0418974	121.25	147.75
AETAm_vs_WT	Crkl	0.123585	0.00187579	0.0420378	2781	2735
AETAm_vs_WT	Hspg2	0.598122	0.00187859	0.0420414	1034.5	1440.75
AETAm_vs_WT	Csrp2	0.604831	0.00188934	0.0422227	156.5	214.75
AETAm_vs_WT	ENSMUSG00000121141	-0.101808	0.00189424	0.0422729	6930.25	5863.75
AETAm_vs_WT	Exd2	-0.156518	0.00190066	0.0423567	5756.25	4722.25
AETAm_vs_WT	Nfat5	0.160549	0.00191519	0.0426209	5439.75	5488.5
AETAm_vs_WT	Rtl6	-0.13147	0.00192545	0.042744	3341	2770.75
AETAm_vs_WT	Garre1	0.142303	0.00192608	0.042744	1769.25	1763
AETAm_vs_WT	Dnah6	1.00474	0.00193655	0.0428076	205.5	362.75
AETAm_vs_WT	Adgrf5	0.162325	0.00193701	0.0428076	1608	1627.25
AETAm_vs_WT	Catip	0.569587	0.00193576	0.0428076	110.75	148.5
AETAm_vs_WT	Trip10	0.441714	0.00194221	0.0428632	238	295
AETAm_vs_WT	Ccdc88c	0.143535	0.00195832	0.0430992	2656.75	2655.25
AETAm_vs_WT	Dagla	-0.0764279	0.00195637	0.0430992	9894	8490.75
AETAm_vs_WT	ENSMUSG00000120777	-0.391324	0.0019626	0.0431339	326.5	227.5
AETAm_vs_WT	Ptpro	-0.160943	0.00197562	0.0433601	1669	1347.25
AETAm_vs_WT	Hcn2	-0.160207	0.00198993	0.0436143	5698.75	4616.75
AETAm_vs_WT	Prrc2c	0.187408	0.00199392	0.0436417	8816	9039
AETAm_vs_WT	Nptx1	-0.100835	0.00200065	0.0437288	36624.8	30851
AETAm_vs_WT	Calml4	1.57995	0.00200977	0.0438681	113.5	307
AETAm_vs_WT	Fyn	-0.107003	0.00202275	0.044091	5435.5	4577.5
AETAm_vs_WT	Evi5	0.125807	0.0020298	0.0441843	3004.25	2960
AETAm_vs_WT	Yap1	0.319004	0.00203841	0.0443111	1067	1215.5
AETAm_vs_WT	Tbc1d9	0.427919	0.0020477	0.0444524	5253.25	6426.25
AETAm_vs_WT	Aebp1	0.782348	0.00206031	0.0446047	759.25	1195.75
AETAm_vs_WT	Fhip1a	0.276191	0.00205925	0.0446047	340.75	374.25
AETAm_vs_WT	Akap10	0.208664	0.00206542	0.0446546	1038	1084.5
AETAm_vs_WT	Ranbp2	0.171285	0.00207894	0.044886	5814	5918.25
AETAm_vs_WT	Clcn5	0.236728	0.00208178	0.0448864	465.75	496.5
AETAm_vs_WT	Rc3h1	0.180529	0.00208502	0.0448955	2235	2285.75
AETAm_vs_WT	Tnpo2	-0.0789853	0.00208861	0.0449123	8283.5	7113.5
AETAm_vs_WT	Tmem222	-0.146612	0.00209329	0.0449522	2105	1726
AETAm_vs_WT	Cfap126	0.875867	0.00212503	0.0455723	81.25	130.5
AETAm_vs_WT	Map3k2	0.212259	0.00213974	0.0456422	1716.5	1796
AETAm_vs_WT	Soat1	0.141011	0.00213168	0.0456422	1834.25	1838
AETAm_vs_WT	Spata6	0.472772	0.00213468	0.0456422	163	205.25
AETAm_vs_WT	Usp34	0.172963	0.00213961	0.0456422	6527.25	6620.75
AETAm_vs_WT	Rasal2	0.217958	0.0021433	0.0456568	4312.5	4508.5
AETAm_vs_WT	Adam8	-0.372906	0.00214642	0.0456623	435	309.75
AETAm_vs_WT	Kcnn3	0.230136	0.00215092	0.045697	1200.5	1270.75
AETAm_vs_WT	Cox14	-0.146108	0.00215775	0.0457811	1419.25	1162.25
AETAm_vs_WT	Cgn	0.445722	0.00216492	0.0458721	326	406.5
AETAm_vs_WT	Cnksr3	0.367506	0.00218384	0.0462116	176.75	206.25
AETAm_vs_WT	D630024D03Rik	1.26243	0.00220353	0.0465165	18.25	40.5
AETAm_vs_WT	4930523C07Rik	0.5734	0.00220701	0.0465165	84.5	113.25
AETAm_vs_WT	Entpd4	-0.219695	0.00220543	0.0465165	3211	2504.75
AETAm_vs_WT	Tspyl4	-0.0831364	0.002222	0.0467706	24748.8	21232
AETAm_vs_WT	Ky	-0.375747	0.00223102	0.0468985	199.25	138.25
AETAm_vs_WT	Zc3hc1	-0.21726	0.00223462	0.0469122	721.75	560
AETAm_vs_WT	Capn11	-2.77859	0.00224819	0.047135	107.75	15.25
AETAm_vs_WT	Ctsc	0.405887	0.00225776	0.0472735	460	553.25
AETAm_vs_WT	Myo18a	0.0785286	0.00227769	0.0475657	8550.25	8170.25
AETAm_vs_WT	9330102E08Rik	-0.139906	0.0022771	0.0475657	1377.75	1131.25
AETAm_vs_WT	Spg11	0.164645	0.00229094	0.0477174	1086.25	1102
AETAm_vs_WT	Rps7	-0.0818508	0.00228898	0.0477174	6524.5	5575.25
AETAm_vs_WT	Dnmt3a	0.143378	0.00229912	0.0477686	4143.25	4134.75
AETAm_vs_WT	Lepr	1.30939	0.00229939	0.0477686	137.5	323.5
AETAm_vs_WT	Slc12a7	0.496135	0.00231539	0.0480083	282.5	358.75
AETAm_vs_WT	9530080O11Rik	-0.509312	0.00231696	0.0480083	116	73.75
AETAm_vs_WT	Mapk6	0.174485	0.00232526	0.0481178	1534.5	1572.5
AETAm_vs_WT	Rsrp1	-0.101411	0.00232898	0.0481322	14517.2	12288.8
AETAm_vs_WT	Fam126a	0.194466	0.00233378	0.048169	1363	1400.75
AETAm_vs_WT	Adipor2	0.194981	0.00234904	0.0484213	2490.5	2561.25
AETAm_vs_WT	Tbcd	0.12559	0.00238692	0.0490781	1813.5	1792.25
AETAm_vs_WT	mt-Nd1	-0.0973078	0.00238706	0.0490781	229002	193981
AETAm_vs_WT	Flrt3	-0.173494	0.00239133	0.0491023	1807	1457.5
AETAm_vs_WT	Zdbf2	0.294853	0.00240381	0.0492317	1180.75	1328.75
AETAm_vs_WT	Slc22a8	0.471281	0.00240172	0.0492317	575.5	732.75
AETAm_vs_WT	Uggt2	0.176658	0.00241867	0.0494092	1248	1276
AETAm_vs_WT	Znrf2	0.164889	0.00241712	0.0494092	1272.5	1287
AETAm_vs_WT	Frmpd4	0.187321	0.0024232	0.0494382	4788.5	4914.25
AETAm_vs_WT	Pdgfd	0.512302	0.00243609	0.0495743	227	297.75
AETAm_vs_WT	Plekha7	0.216285	0.00243462	0.0495743	1135.75	1196
AETAm_vs_WT	Nsd1	0.162615	0.0024428	0.0495841	6658.75	6698.25
AETAm_vs_WT	Cish	0.700059	0.0024404	0.0495841	182.25	274.5
AETAm_vs_WT	Ccnd3	0.265807	0.00244848	0.0496172	1093.75	1193.5
AETAm_vs_WT	P3h2	0.348718	0.00245065	0.0496172	239.5	276.25
AETAm_vs_WT	Cd151	0.248705	0.00246545	0.0497903	647.75	696.75
AETAm_vs_WT	Elovl6	0.111694	0.00246422	0.0497903	3128.25	3057.25
AETAm_vs_WT	Tbce	-0.141741	0.00247359	0.0498685	2048.25	1686.25
AETAm_vs_WT	Fam161a	0.50506	0.00247558	0.0498685	183	236.5
AETAm_vs_WT	Nid1	0.449006	0.00248673	0.0499237	351.25	437.25
AETAm_vs_WT	Pde8b	-0.109338	0.00248757	0.0499237	3212.5	2703.25
AETAm_vs_WT	Zfp982	0.697626	0.00248772	0.0499237	58.5	87
AETAm_vs_WT	Ccdc117	0.251897	0.00250595	0.0502178	774	827.75
AETAm_vs_WT	Sdc1	0.979151	0.00251441	0.0502178	32.75	58.75
AETAm_vs_WT	Igsf8	-0.100452	0.00251499	0.0502178	8204.75	6944.75
AETAm_vs_WT	Capsl	0.650017	0.00250977	0.0502178	100.5	141.75
AETAm_vs_WT	Miga1	0.124564	0.0025468	0.0507894	5087.75	5029.75
AETAm_vs_WT	Rbm3	0.41151	0.0025585	0.050959	3187.5	3741.75
AETAm_vs_WT	Prdm16	0.638388	0.00256234	0.0509717	833.25	1161.5
AETAm_vs_WT	Zfp106	0.157286	0.00257119	0.0510359	11690.8	11754.5
AETAm_vs_WT	Acad8	0.287874	0.00257197	0.0510359	1143.75	1263.5
AETAm_vs_WT	Tspan17	-0.192554	0.0025761	0.0510542	966.75	763.75
AETAm_vs_WT	Ankrd26	0.199944	0.00259424	0.0512854	842.5	877.5
AETAm_vs_WT	Acadsb	0.113233	0.00259676	0.0512854	2968	2918
AETAm_vs_WT	Slc31a1	0.815016	0.00259742	0.0512854	1028.75	1663.75
AETAm_vs_WT	1700007K13Rik	0.591818	0.00262014	0.0516699	83	112.25
AETAm_vs_WT	Cpne3	0.190409	0.0026326	0.0518515	841.5	868.25
AETAm_vs_WT	Vezf1	0.148331	0.0026403	0.0519389	1569.75	1580
AETAm_vs_WT	Ubxn10	0.573523	0.00264981	0.0520617	128.25	174
AETAm_vs_WT	Lama2	0.224088	0.00265893	0.0521124	730	776
AETAm_vs_WT	Myo9a	0.156628	0.00265645	0.0521124	5031.25	5055.25
AETAm_vs_WT	Cdk5r1	-0.0886174	0.00267152	0.0522948	11132.2	9487
AETAm_vs_WT	Grb10	0.226514	0.00269599	0.0523613	1657.5	1772.75
AETAm_vs_WT	Vdac1	-0.0640184	0.00268603	0.0523613	15987.2	13845
AETAm_vs_WT	Emb	0.572626	0.00269405	0.0523613	1162.75	1590
AETAm_vs_WT	Got1	-0.0755719	0.00269792	0.0523613	12003	10307
AETAm_vs_WT	Trp73	0.508802	0.00268906	0.0523613	199	255.25
AETAm_vs_WT	Mapkbp1	0.133424	0.00268647	0.0523613	3060.25	3034
AETAm_vs_WT	Pck2	-0.164327	0.00269675	0.0523613	1426.25	1152.25
AETAm_vs_WT	Rabl6	-0.0918474	0.00271158	0.0524812	6400.75	5453.5
AETAm_vs_WT	Edem1	0.163572	0.00271398	0.0524812	1033.75	1050.5
AETAm_vs_WT	Gpatch8	0.10689	0.00270875	0.0524812	5089.75	4962.75
AETAm_vs_WT	Ccdc113	0.787326	0.00272011	0.052536	67.25	104.25
AETAm_vs_WT	Ggh	0.34246	0.0027261	0.052588	452.25	521.25
AETAm_vs_WT	Helz	0.130457	0.00273219	0.0526418	2984.75	2954.75
AETAm_vs_WT	Coq2	-0.123907	0.00277154	0.0533354	2602.75	2162.25
AETAm_vs_WT	Cspg4b	1.2411	0.00278605	0.0534854	149.75	322
AETAm_vs_WT	Uap1l1	0.26865	0.00278532	0.0534854	421.25	456.75
AETAm_vs_WT	Peg3	0.183828	0.00282874	0.0539798	15476.2	15894.2
AETAm_vs_WT	Sos1	0.147084	0.00281781	0.0539798	3218.5	3219.25
AETAm_vs_WT	Ak8	0.656097	0.00282274	0.0539798	58.25	81.5
AETAm_vs_WT	Daam1	0.107339	0.00282293	0.0539798	3964.5	3857.75
AETAm_vs_WT	Gpr162	-0.116015	0.00282711	0.0539798	7857.75	6584.75
AETAm_vs_WT	Szt2	0.212254	0.00283255	0.0539878	2789.5	2935
AETAm_vs_WT	Niban2	0.305845	0.00284384	0.0540737	1172.25	1319.5
AETAm_vs_WT	Zbtb7b	0.224972	0.0028427	0.0540737	642	677.5
AETAm_vs_WT	Pdcd6ip	0.0979819	0.00285338	0.0541905	3909	3788.25
AETAm_vs_WT	Ankhd1	0.21082	0.00286065	0.0542269	2629	2747
AETAm_vs_WT	Pikfyve	0.16374	0.00286211	0.0542269	2475.25	2515.25
AETAm_vs_WT	Bicdl1	0.132327	0.0028762	0.0544291	1944.5	1926
AETAm_vs_WT	Sytl2	0.211595	0.00288203	0.0544748	1301.5	1354.25
AETAm_vs_WT	Kif1c	0.145125	0.00289899	0.0545366	6219.25	6217.25
AETAm_vs_WT	Chuk	0.118181	0.00288954	0.0545366	1934.75	1901
AETAm_vs_WT	Epb41l5	0.319701	0.00289428	0.0545366	368.5	412.5
AETAm_vs_WT	Bod1l	0.190652	0.00289825	0.0545366	3455.25	3570
AETAm_vs_WT	Ogfod3	0.435685	0.00290813	0.0546009	158.75	196
AETAm_vs_WT	Tspo	0.545426	0.00290926	0.0546009	123.25	163.75
AETAm_vs_WT	Gapvd1	0.107785	0.00292375	0.0548083	4542.75	4422.75
AETAm_vs_WT	Wapl	0.125872	0.00294123	0.0550712	2805.5	2763.25
AETAm_vs_WT	Cyp1b1	0.566966	0.00294797	0.0551233	176.25	239
AETAm_vs_WT	Xylt1	0.125414	0.00295093	0.0551233	3724.5	3675
AETAm_vs_WT	Rab20	1.04481	0.00296271	0.0552784	34	63.5
AETAm_vs_WT	Scn1b	-0.127569	0.00298701	0.0553001	14533	12074
AETAm_vs_WT	Rev3l	0.197406	0.00299604	0.0553001	2073.25	2144.5
AETAm_vs_WT	Ston2	0.23124	0.00301177	0.0553001	1770.5	1860
AETAm_vs_WT	Sult1c2	1.51097	0.0029915	0.0553001	24.75	66.75
AETAm_vs_WT	Jph3	-0.0955591	0.00300699	0.0553001	12735.2	10788.5
AETAm_vs_WT	Lancl1	-0.0845944	0.00299923	0.0553001	6645.75	5667
AETAm_vs_WT	Vim	0.303636	0.00298927	0.0553001	1528	1686.5
AETAm_vs_WT	Col9a3	1.43793	0.00300385	0.0553001	956.25	2416.25
AETAm_vs_WT	Robo3	-0.280957	0.002993	0.0553001	1523	1133.5
AETAm_vs_WT	Cspg4	-0.190726	0.0029952	0.0553001	1487.5	1186.25
AETAm_vs_WT	Etl4	0.171205	0.00297424	0.0553001	4030.25	4142.25
AETAm_vs_WT	Alx4	1.0073	0.00301246	0.0553001	65.75	125.5
AETAm_vs_WT	Mdfic	1.16231	0.00296929	0.0553001	186.5	380.75
AETAm_vs_WT	Gprin1	-0.114499	0.00300801	0.0553001	8631.25	7220.5
AETAm_vs_WT	Adgrb1	-0.102612	0.00302004	0.0553755	22558.8	19047.5
AETAm_vs_WT	Dynll1	-0.097082	0.00303795	0.05564	10101.2	8537.5
AETAm_vs_WT	Maneal	-0.119392	0.00304678	0.0557376	2497.25	2080
AETAm_vs_WT	Gps1	-0.111164	0.00305907	0.0558982	4422.75	3707.25
AETAm_vs_WT	Cntrl	0.20054	0.00306455	0.0559342	798.75	830.75
AETAm_vs_WT	Sstr1	-0.253635	0.00308113	0.0561724	523.25	399
AETAm_vs_WT	Thbs2	0.442034	0.00309628	0.0563841	219.25	270.75
AETAm_vs_WT	Mapk8ip1	-0.0829644	0.0031043	0.0564013	14400.8	12291
AETAm_vs_WT	Pacsin1	-0.0757069	0.00310101	0.0564013	20310	17493.8
AETAm_vs_WT	Lef1	0.359845	0.00311461	0.0565242	260	303.5
AETAm_vs_WT	Zfp326	0.148606	0.00311843	0.056529	1282	1289.75
AETAm_vs_WT	Actn1	0.119445	0.0031551	0.057008	4286.75	4218.25
AETAm_vs_WT	Tpi1	-0.0861372	0.00315558	0.057008	18301	15630.2
AETAm_vs_WT	Parp6	-0.118309	0.00314984	0.057008	4809	4013
AETAm_vs_WT	Abhd12	-0.0696084	0.00316511	0.0570507	11128.8	9595.5
AETAm_vs_WT	Syngr2	0.277097	0.00316314	0.0570507	332.75	364.25
AETAm_vs_WT	Cfap47	0.702036	0.00317106	0.0570935	55.75	82
AETAm_vs_WT	Shc3	0.38897	0.00318613	0.0573001	750.25	886.5
AETAm_vs_WT	Itga3	0.264581	0.00319432	0.0573239	838.5	915
AETAm_vs_WT	Smap2	-0.0891864	0.00319934	0.0573239	6996	5967.75
AETAm_vs_WT	Sgms2	1.15751	0.00320196	0.0573239	232.25	481.75
AETAm_vs_WT	Tns1	0.460769	0.00319937	0.0573239	2494.25	3147
AETAm_vs_WT	Ptk2b	-0.0803411	0.00320545	0.0573239	44255.5	37788.8
AETAm_vs_WT	Sulf1	1.63662	0.00320978	0.057337	733	2129.25
AETAm_vs_WT	Tead2	0.610572	0.00321396	0.0573474	79.5	110.75
AETAm_vs_WT	Amer2	0.134936	0.00323336	0.057629	4706.25	4680
AETAm_vs_WT	Tcaf2	0.922066	0.00323806	0.0576483	34.5	60
AETAm_vs_WT	Adk	-0.148971	0.00325526	0.0578899	1737.25	1424.75
AETAm_vs_WT	Son	0.150123	0.00327542	0.0581834	18089.8	18118.5
AETAm_vs_WT	Rora	0.213152	0.00328297	0.0582272	1520.25	1601.5
AETAm_vs_WT	Ypel4	-0.117934	0.00328519	0.0582272	3069.75	2565.5
AETAm_vs_WT	Ash1l	0.159244	0.00330775	0.058562	6916.5	6954
AETAm_vs_WT	Usp22	-0.0757357	0.00332561	0.0588127	11994	10303
AETAm_vs_WT	Dnm1	-0.0726874	0.00336929	0.0592564	63172.2	54402
AETAm_vs_WT	Col9a2	0.702569	0.00336359	0.0592564	125.5	191.5
AETAm_vs_WT	Anp32a	-0.107643	0.00336676	0.0592564	7206.75	6053
AETAm_vs_WT	Zhx3	0.118112	0.00336361	0.0592564	3398.75	3326.75
AETAm_vs_WT	Fbxo31	-0.0896529	0.00336115	0.0592564	6005.5	5109.5
AETAm_vs_WT	Mtor	0.128032	0.00338071	0.0593916	5621.5	5553.25
AETAm_vs_WT	Usp6nl	0.233597	0.00339471	0.0594411	930.5	984.75
AETAm_vs_WT	Stk32a	0.337206	0.00339354	0.0594411	251.75	286.75
AETAm_vs_WT	Edem3	0.139693	0.00339419	0.0594411	2654	2647.75
AETAm_vs_WT	Arhgap28	1.00079	0.0034204	0.0598252	41.25	75.75
AETAm_vs_WT	Ak9	0.747574	0.00344174	0.0601324	48	73.25
AETAm_vs_WT	Thbs4	-0.279133	0.00345203	0.0601789	731.5	551
AETAm_vs_WT	Bcor	0.158511	0.00345574	0.0601789	1274.75	1287.5
AETAm_vs_WT	Gm43844	0.919098	0.00345423	0.0601789	21.25	35.75
AETAm_vs_WT	Pcp4l1	0.430563	0.00347637	0.0604722	1862.75	2270.25
AETAm_vs_WT	Inf2	-0.138721	0.00348285	0.0605188	6694	5509.25
AETAm_vs_WT	Diaph3	0.527745	0.00349926	0.0606312	74.5	97.25
AETAm_vs_WT	Fads3	0.231632	0.00350112	0.0606312	1310.75	1399
AETAm_vs_WT	Dnajb6	-0.0836491	0.00350454	0.0606312	6062.5	5177.25
AETAm_vs_WT	Zic1	1.40124	0.00350181	0.0606312	504.25	1204
AETAm_vs_WT	Ube3a	0.16312	0.00351014	0.0606623	5580.75	5660.5
AETAm_vs_WT	Calb1	-0.122415	0.00353738	0.0610667	4699	3898.75
AETAm_vs_WT	Cbl	0.152982	0.00354725	0.0611708	4544.75	4550.25
AETAm_vs_WT	Nid2	1.08359	0.00355363	0.0612147	294.25	577.5
AETAm_vs_WT	Dgkz	-0.0754266	0.00356468	0.0613274	23167.5	19870
AETAm_vs_WT	ENSMUSG00000120162	-0.327165	0.00356788	0.0613274	259.5	187.5
AETAm_vs_WT	Cux1	0.156657	0.00358169	0.0614986	1862	1890.75
AETAm_vs_WT	Lama5	0.545424	0.00358764	0.0615343	955	1279.75
AETAm_vs_WT	Tnrc6b	0.128061	0.00359224	0.0615471	4901	4850
AETAm_vs_WT	Braf	0.1234	0.00361479	0.0616788	7190	7068.75
AETAm_vs_WT	Zfp318	0.130175	0.00360858	0.0616788	2614.5	2585.5
AETAm_vs_WT	Mycbpap	0.745684	0.00361146	0.0616788	132.5	203.75
AETAm_vs_WT	Sars	-0.0831133	0.00361928	0.0616788	5894.75	5051
AETAm_vs_WT	Catspere2	0.392199	0.00361667	0.0616788	139.25	164
AETAm_vs_WT	Slc25a13	0.535247	0.00363362	0.0618569	110	144.5
AETAm_vs_WT	Pkd2	0.103787	0.00365678	0.0621848	2904	2826.5
AETAm_vs_WT	Samd4	0.174826	0.00367184	0.0623079	1388.5	1414
AETAm_vs_WT	Ifitm2	0.543411	0.00367013	0.0623079	221	294.25
AETAm_vs_WT	Agap2	-0.0775438	0.00369005	0.0624175	62388.5	53506
AETAm_vs_WT	Atp9a	-0.0668149	0.00368239	0.0624175	15875	13713.8
AETAm_vs_WT	Tspan7	-0.0775693	0.00368711	0.0624175	35505.8	30526.5
AETAm_vs_WT	Car11	-0.137713	0.00372363	0.0629187	4489.5	3706.75
AETAm_vs_WT	Bcam	0.43052	0.00372803	0.0629263	598.5	735.5
AETAm_vs_WT	Setx	0.174454	0.00374042	0.0630686	3283.75	3333.5
AETAm_vs_WT	Pdlim5	0.172788	0.00377404	0.0632156	1571.25	1604.75
AETAm_vs_WT	Adgrb2	-0.0869768	0.00376352	0.0632156	29708.8	25287.2
AETAm_vs_WT	Rab11fip1	0.571968	0.00378126	0.0632156	258.5	349.5
AETAm_vs_WT	Faah	-0.0940623	0.0037725	0.0632156	7757.75	6580.25
AETAm_vs_WT	Fam210a	0.143389	0.0037685	0.0632156	2013	2006.25
AETAm_vs_WT	Ghitm	-0.0701617	0.00377539	0.0632156	14831.5	12828.2
AETAm_vs_WT	Aff4	0.151734	0.00377107	0.0632156	11117.2	11153.2
AETAm_vs_WT	Cd2ap	0.190017	0.00378484	0.0632156	1446.75	1495.5
AETAm_vs_WT	Neat1	0.20226	0.00378166	0.0632156	9194.75	9472.5
AETAm_vs_WT	Tdo2	-0.385304	0.00379949	0.0633274	232.25	161.5
AETAm_vs_WT	Lcat	-0.240481	0.00379569	0.0633274	911	705.5
AETAm_vs_WT	Kcnt1	0.147922	0.00381233	0.063475	3083	3103.25
AETAm_vs_WT	Ywhab	-0.0800366	0.00382032	0.0635418	27134.5	23183.2
AETAm_vs_WT	Vasn	0.504872	0.00383194	0.0636686	304	398.5
AETAm_vs_WT	Stard13	0.228378	0.00384374	0.0637981	1215.5	1293
AETAm_vs_WT	Tango2	-0.13087	0.0038507	0.0638471	2012	1669.5
AETAm_vs_WT	Asns	-0.10536	0.00385989	0.0639329	3330	2805.75
AETAm_vs_WT	Ing4	-0.138766	0.0038703	0.0639704	1321.5	1088.5
AETAm_vs_WT	Med13	0.18053	0.00386686	0.0639704	3654.75	3751.5
AETAm_vs_WT	Retreg2	-0.0951417	0.00387419	0.0639704	7248.25	6147
AETAm_vs_WT	Rasl10a	-0.21059	0.00388034	0.0640055	1547.5	1206
AETAm_vs_WT	Wsb2	-0.0779902	0.00389151	0.0641234	9080.25	7775.75
AETAm_vs_WT	Tmem121b	-0.139075	0.0038973	0.0641525	2800.5	2304.75
AETAm_vs_WT	Gm5124	-0.147251	0.0039333	0.0646783	1603.75	1313.75
AETAm_vs_WT	Camk2n1	-0.12583	0.00394971	0.0648811	33373.2	27779.2
AETAm_vs_WT	Wdr20	0.183548	0.00395455	0.0648937	758	775.75
AETAm_vs_WT	Mlf2	-0.0655815	0.00397282	0.0651264	16391.2	14177
AETAm_vs_WT	Rpsa	-0.0898984	0.00398335	0.0651723	11468.5	9773
AETAm_vs_WT	Spint2	0.758898	0.0039838	0.0651723	692.5	1075.25
AETAm_vs_WT	Fastk	-0.110995	0.00399223	0.0652433	2958	2482.25
AETAm_vs_WT	Lmbrd2	0.147829	0.00401824	0.065601	4932.5	4951.5
AETAm_vs_WT	Cox6b2	0.814407	0.00404455	0.065963	74.75	120.75
AETAm_vs_WT	Flvcr2	0.598127	0.00406525	0.0661666	106.25	146.75
AETAm_vs_WT	Rgs3	0.191994	0.00406534	0.0661666	973.75	1012.75
AETAm_vs_WT	Cntnap2	0.160574	0.00407695	0.0662878	5501.25	5544.5
AETAm_vs_WT	Lrp5	0.315801	0.00410385	0.0665893	609	689
AETAm_vs_WT	Mycbp	0.347326	0.00410215	0.0665893	183.5	210.75
AETAm_vs_WT	Otud4	0.16789	0.00412464	0.0668587	3448.75	3487
AETAm_vs_WT	Coch	1.03763	0.00417101	0.0673498	216.25	411.25
AETAm_vs_WT	Ocln	0.243187	0.00418645	0.0673498	678.25	725.25
AETAm_vs_WT	Tnk2	-0.0820299	0.00418479	0.0673498	10767.2	9217.25
AETAm_vs_WT	Idh2	0.146053	0.00417542	0.0673498	1410.75	1417
AETAm_vs_WT	Arl6ip5	-0.0919351	0.00418875	0.0673498	4472.75	3803.75
AETAm_vs_WT	Ulk4	0.357964	0.00418804	0.0673498	231	267.25
AETAm_vs_WT	Ccdc121	0.748622	0.00418026	0.0673498	37.25	56
AETAm_vs_WT	Rp2	0.261689	0.00415974	0.0673498	601.75	659
AETAm_vs_WT	Col20a1	-0.391041	0.00419304	0.0673507	281.75	195.75
AETAm_vs_WT	Klhdc8b	0.280814	0.00420595	0.0674221	782.5	862
AETAm_vs_WT	Trmt1l	0.131598	0.00420417	0.0674221	1390.25	1374.75
AETAm_vs_WT	Tmed8	0.116476	0.00421082	0.0674324	2813.5	2757.5
AETAm_vs_WT	Hebp1	-0.15511	0.00422533	0.0675289	1223.5	994.25
AETAm_vs_WT	Nwd1	0.176028	0.00422478	0.0675289	4236.75	4349.75
AETAm_vs_WT	Slc26a4	-0.204686	0.00423291	0.0675634	716.75	564
AETAm_vs_WT	Tmem179	-0.106821	0.00423597	0.0675634	4678.5	3921.5
AETAm_vs_WT	Krt8	1.45744	0.00427809	0.068167	56.25	142
AETAm_vs_WT	Elk4	0.195345	0.00430569	0.0681895	796.75	821.75
AETAm_vs_WT	Gfpt1	0.0984096	0.00430945	0.0681895	3592	3486
AETAm_vs_WT	Necap1	-0.0784262	0.00430245	0.0681895	7487.75	6418.5
AETAm_vs_WT	Kcnh2	0.237379	0.00430904	0.0681895	1231	1315.75
AETAm_vs_WT	Mlxip	0.137664	0.00429307	0.0681895	1952.25	1939.5
AETAm_vs_WT	Zfp169	0.289019	0.0042996	0.0681895	530.75	585.5
AETAm_vs_WT	H2aj	-0.173344	0.00430132	0.0681895	1173.25	944.5
AETAm_vs_WT	Mgat5b	-0.163447	0.00433649	0.0685493	2520.25	2044.25
AETAm_vs_WT	Perp	0.967546	0.00435116	0.0686472	176	319
AETAm_vs_WT	N4bp2l2	0.18195	0.00435391	0.0686472	1926.5	1978.25
AETAm_vs_WT	Vwa3a	0.304271	0.00435561	0.0686472	657.5	731
AETAm_vs_WT	Mapkapk3	0.62759	0.00436868	0.0687852	82.75	116.75
AETAm_vs_WT	Gdf10	-0.230632	0.00438488	0.068904	521.75	402.75
AETAm_vs_WT	Pdgfra	0.123836	0.00438438	0.068904	2147.25	2118.5
AETAm_vs_WT	Cers1	-0.119987	0.00439305	0.0689644	4584.5	3826.25
AETAm_vs_WT	Mmp15	0.296839	0.00440551	0.0690615	916	1025.75
AETAm_vs_WT	Ankrd17	0.138498	0.00440791	0.0690615	7045.5	7000
AETAm_vs_WT	Kmt2a	0.134302	0.00444083	0.069426	7621	7539.5
AETAm_vs_WT	Slain2	0.153028	0.00443739	0.069426	1246.5	1255
AETAm_vs_WT	mt-Nd2	-0.0891732	0.00444424	0.069426	178103	152092
AETAm_vs_WT	Etfdh	0.142393	0.00446589	0.0696958	1227.5	1228.75
AETAm_vs_WT	Dmtn	-0.111215	0.00447318	0.0697413	13357	11223.8
AETAm_vs_WT	Mdp1	-0.152669	0.00449369	0.0698298	1494.5	1211.5
AETAm_vs_WT	Btf3	-0.103922	0.00450003	0.0698298	3186.75	2675.25
AETAm_vs_WT	Agk	-0.134553	0.00449204	0.0698298	1550	1282.25
AETAm_vs_WT	Rab3a	-0.0861685	0.00450515	0.0698298	19808.2	16891.5
AETAm_vs_WT	Vat1l	1.04579	0.00449167	0.0698298	1458	2762.5
AETAm_vs_WT	Nt5dc3	-0.0794936	0.00450114	0.0698298	14106.8	12081.5
AETAm_vs_WT	Gpr153	0.345536	0.0045098	0.0698339	334.5	383.25
AETAm_vs_WT	Serpinb1b	1.1816	0.00452261	0.0699643	40.25	84.5
AETAm_vs_WT	Trrap	0.113699	0.00453619	0.0701064	7912.75	7739
AETAm_vs_WT	Cap2	-0.0814732	0.00454636	0.0701954	10251	8772.5
AETAm_vs_WT	A230006K03Rik	0.468052	0.00457035	0.0704975	120.5	150.25
AETAm_vs_WT	Cdkn1c	1.12284	0.00457891	0.0705612	257.75	519.25
AETAm_vs_WT	Ccdc162	0.611236	0.00459764	0.0707814	123.25	165.75
AETAm_vs_WT	Ltc4s	0.85777	0.00461667	0.0707997	82	135.5
AETAm_vs_WT	Adcy6	0.121605	0.00462104	0.0707997	2903.25	2868
AETAm_vs_WT	Atp6v1g2	-0.0776076	0.00461236	0.0707997	18619.5	15968
AETAm_vs_WT	Angptl6	-0.312763	0.00462022	0.0707997	231.75	169.25
AETAm_vs_WT	Gm42878	0.272263	0.00461911	0.0707997	529	577.25
AETAm_vs_WT	Fkbp8	-0.0815996	0.0046402	0.0709842	10808.8	9255.5
AETAm_vs_WT	Zbtb41	0.149018	0.004642	0.0709842	1201	1207.75
AETAm_vs_WT	Homer2	0.165839	0.00466756	0.0713067	3621	3686.5
AETAm_vs_WT	Smim10l1	-0.124095	0.00468782	0.0715477	5839	4882.5
AETAm_vs_WT	Morn1	0.399068	0.00469976	0.0716612	181	216
AETAm_vs_WT	Slc38a3	0.233805	0.00471607	0.0716818	2754.25	2962.75
AETAm_vs_WT	Traf3	0.0994346	0.00471737	0.0716818	3900.5	3780.25
AETAm_vs_WT	Rbfox3	-0.094844	0.0047191	0.0716818	11402.8	9684.75
AETAm_vs_WT	Gabrg3	0.181367	0.00470663	0.0716818	969.75	991
AETAm_vs_WT	Meg3	0.132679	0.00474794	0.0720511	186486	185332
AETAm_vs_WT	Mcat	-0.207195	0.00476459	0.072235	579.75	452.25
AETAm_vs_WT	Gm37940	-0.503589	0.00479867	0.0726825	98.25	63.25
AETAm_vs_WT	Crybg3	0.323662	0.00480696	0.0727389	329.5	371.75
AETAm_vs_WT	Smim45	-0.1161	0.00484124	0.0731882	2438.25	2043
AETAm_vs_WT	Vamp1	-0.0958069	0.00485583	0.0733096	5182.75	4399.75
AETAm_vs_WT	Gm19935	0.523026	0.00485847	0.0733096	182.25	234
AETAm_vs_WT	Uba6	0.142613	0.00487204	0.0733754	1085.75	1084.25
AETAm_vs_WT	Cyb5d2	-0.200502	0.00487171	0.0733754	587.75	464.75
AETAm_vs_WT	Usp53	0.211714	0.00487889	0.0734091	896.25	945.5
AETAm_vs_WT	Slc1a4	-0.0959198	0.00490246	0.0736302	2922.75	2479.75
AETAm_vs_WT	Trim33	0.14027	0.00490283	0.0736302	3516.75	3491.25
AETAm_vs_WT	Cdh10	-0.152175	0.00492326	0.0737286	1538	1256.5
AETAm_vs_WT	Wrap73	-0.175171	0.00492146	0.0737286	827	664.25
AETAm_vs_WT	Arpc1b	0.235628	0.00491892	0.0737286	501.75	533
AETAm_vs_WT	Nup98	0.13829	0.00493393	0.073819	2013	2002.25
AETAm_vs_WT	Cd74	1.01275	0.00494666	0.0739217	158.25	283
AETAm_vs_WT	Zer1	-0.0730827	0.00495007	0.0739217	12159.2	10501.2
AETAm_vs_WT	Slc5a6	0.286969	0.00495477	0.0739225	870.5	963.25
AETAm_vs_WT	Amph	-0.0968243	0.00497933	0.0740765	10807	9126
AETAm_vs_WT	Rfx2	0.354893	0.00498368	0.0740765	216.25	246.75
AETAm_vs_WT	Tmed9	-0.104422	0.004978	0.0740765	3415.25	2876.5
AETAm_vs_WT	5830417I10Rik	0.221179	0.00498346	0.0740765	794.25	838.75
AETAm_vs_WT	Bbs12	-0.357618	0.00498945	0.0740905	202	142.5
AETAm_vs_WT	Yae1d1	0.140516	0.00499393	0.0740905	1526	1519.25
AETAm_vs_WT	Mon2	0.113777	0.0050025	0.0741486	4714	4607.5
AETAm_vs_WT	Usf3	0.150579	0.0050266	0.0744366	3011.25	3013
AETAm_vs_WT	Pign	0.1828	0.00504965	0.0747086	863.25	886.75
AETAm_vs_WT	Efhc1	0.697988	0.00506329	0.0748408	66	95.75
AETAm_vs_WT	Acox3	0.134867	0.00508853	0.0751036	1345.75	1337
AETAm_vs_WT	Wdr90	0.155614	0.00509049	0.0751036	1068	1082.25
AETAm_vs_WT	Strn	0.11987	0.00512977	0.0751957	3915.25	3844.75
AETAm_vs_WT	Gabbr1	-0.0623075	0.0051281	0.0751957	32311.2	28002.8
AETAm_vs_WT	Agpat2	0.737723	0.00512081	0.0751957	46.5	70.75
AETAm_vs_WT	Tmem35a	-0.115382	0.00510512	0.0751957	2047.75	1711
AETAm_vs_WT	Cpne7	-0.149877	0.00510972	0.0751957	14469.8	11772.2
AETAm_vs_WT	Dap	0.321954	0.00512476	0.0751957	190.75	214.75
AETAm_vs_WT	Setd2	0.181872	0.0051122	0.0751957	3345.25	3411.75
AETAm_vs_WT	Taf2	0.131676	0.00513552	0.0752108	1666.25	1660
AETAm_vs_WT	Htra1	-0.131642	0.00514264	0.0752459	5307.5	4411.5
AETAm_vs_WT	Gm49601	-0.123015	0.00516111	0.0754469	3105.75	2584
AETAm_vs_WT	Lztr1	-0.0889128	0.00518073	0.0756644	7407	6313.5
AETAm_vs_WT	Twsg1	0.146275	0.00519301	0.0756759	1682.5	1684.75
AETAm_vs_WT	Kdm6a	0.137068	0.00519577	0.0756759	1793.25	1783.25
AETAm_vs_WT	Chchd2	-0.0977847	0.00519304	0.0756759	6370.25	5397.5
AETAm_vs_WT	Klhl2	-0.10738	0.00520167	0.0756926	12814	10794
AETAm_vs_WT	Asxl2	0.199387	0.00521141	0.0757651	1424.5	1474.75
AETAm_vs_WT	Xiap	0.118498	0.00529143	0.0764403	3982.5	3913.75
AETAm_vs_WT	Prom2	1.20013	0.00528888	0.0764403	18	36
AETAm_vs_WT	Trp53inp1	0.209159	0.00526835	0.0764403	736	766
AETAm_vs_WT	Igsf1	0.375113	0.00528395	0.0764403	324.25	377.75
AETAm_vs_WT	Chic1	0.132984	0.0052758	0.0764403	2265.25	2244.75
AETAm_vs_WT	Abca9	0.272106	0.00528856	0.0764403	398	439.5
AETAm_vs_WT	Pcdhb5	-0.28082	0.00526646	0.0764403	371.25	277.5
AETAm_vs_WT	Rsl24d1	-0.143232	0.00530202	0.0764546	1516	1238.25
AETAm_vs_WT	Svop	-0.0842048	0.00529924	0.0764546	7542.5	6427.25
AETAm_vs_WT	Ptpn14	0.279749	0.00530916	0.0764885	979.25	1083.25
AETAm_vs_WT	Sap30bp	-0.116742	0.00531887	0.0765591	1924.75	1606.25
AETAm_vs_WT	Antxr1	0.547386	0.00532399	0.0765636	760.75	1009
AETAm_vs_WT	Insyn1	-0.118507	0.00534905	0.0768545	6777.75	5651.5
AETAm_vs_WT	Tnks	0.130987	0.00535774	0.0769101	5945	5880.75
AETAm_vs_WT	Tbc1d10b	-0.0986588	0.00536547	0.0769518	3601.25	3038.5
AETAm_vs_WT	Chd4	0.109225	0.00539967	0.0773727	10706.5	10394.2
AETAm_vs_WT	Lrrc8a	0.126295	0.00540712	0.0773804	1678	1660.25
AETAm_vs_WT	Smyd5	-0.12335	0.00541479	0.0773804	1954	1622
AETAm_vs_WT	Ppp1r10	-0.133279	0.005414	0.0773804	2797.5	2319.25
AETAm_vs_WT	Snx9	0.221572	0.00543148	0.0774107	712	755.5
AETAm_vs_WT	Tjp1	0.127752	0.00542368	0.0774107	5361.25	5294.75
AETAm_vs_WT	Tmtc3	0.189719	0.00543141	0.0774107	798.5	825.75
AETAm_vs_WT	Helz2	0.307491	0.00543697	0.0774198	326	367.5
AETAm_vs_WT	Fzd7	0.417625	0.00545761	0.077575	537.25	649
AETAm_vs_WT	Omg	-0.0993798	0.00545632	0.077575	3833	3250.25
AETAm_vs_WT	Slc37a2	1.10401	0.00548626	0.0779127	221.25	443.25
AETAm_vs_WT	Rbbp8	0.38275	0.00549126	0.0779143	128.5	151.25
AETAm_vs_WT	Sirpa	-0.0697084	0.00550352	0.0780188	16659.2	14386.2
AETAm_vs_WT	Rnf187	-0.0859294	0.00552276	0.0782219	12772.2	10923.8
AETAm_vs_WT	4933406B17Rik	0.933287	0.00552916	0.078243	23.25	39
AETAm_vs_WT	Klf12	0.362959	0.0055411	0.0783424	856.25	993.25
AETAm_vs_WT	Agtrap	0.298628	0.00556126	0.0785577	452.75	508.25
AETAm_vs_WT	Rrbp1	0.145782	0.00557798	0.0786545	2274.25	2271.25
AETAm_vs_WT	AW047730	-0.20377	0.00557696	0.0786545	829.75	658.5
AETAm_vs_WT	Marveld1	0.278859	0.00559039	0.0787598	388	426.5
AETAm_vs_WT	1700030C10Rik.1	1.04425	0.0056393	0.0793787	28	50
AETAm_vs_WT	Nova2	-0.0992711	0.00564874	0.0794413	7878.5	6652.25
AETAm_vs_WT	Nfkb1	0.164578	0.0056695	0.0795585	866.75	878.25
AETAm_vs_WT	Tgfbr2	0.230966	0.00566329	0.0795585	863.25	913.75
AETAm_vs_WT	Acer2	0.346481	0.00567205	0.0795585	379.75	431.75
AETAm_vs_WT	Wsb1	-0.0897723	0.00568466	0.0796652	3958	3373.5
AETAm_vs_WT	Heatr5b	0.140101	0.00570484	0.0798778	2112.75	2106.25
AETAm_vs_WT	Lrp3	-0.0971256	0.00571364	0.0799308	3492.5	2959
AETAm_vs_WT	Sft2d2	0.195453	0.0057492	0.0803577	1461.75	1512.75
AETAm_vs_WT	Nell2	-0.0770322	0.00576799	0.0804791	33096	28337.5
AETAm_vs_WT	Jhy	1.02257	0.00576401	0.0804791	18.5	34
AETAm_vs_WT	Senp7	0.147435	0.00579155	0.0807372	1790	1797
AETAm_vs_WT	Ccdc6	0.135059	0.00580507	0.0808549	3232.75	3197.5
AETAm_vs_WT	Stk32c	-0.10982	0.00581529	0.0808839	3040	2545.25
AETAm_vs_WT	Vps52	-0.0985949	0.00581731	0.0808839	3619.75	3055.5
AETAm_vs_WT	Phlpp2	0.131466	0.00589367	0.0818167	2543	2515.25
AETAm_vs_WT	Skp1	-0.0804692	0.00589467	0.0818167	11887	10161.8
AETAm_vs_WT	Lct	-0.156253	0.00591243	0.0819919	2238.5	1818.75
AETAm_vs_WT	Naalad2	0.472774	0.00592361	0.0820754	72	90.5
AETAm_vs_WT	Thrb	0.139257	0.00595612	0.0824543	2048.5	2042.5
AETAm_vs_WT	Tmem150c	-0.12139	0.00596848	0.0825536	3592.5	2993
AETAm_vs_WT	Ksr2	0.150477	0.00598174	0.0826652	3632	3645.5
AETAm_vs_WT	Tcf12	0.165595	0.00600652	0.0829358	2470	2491.5
AETAm_vs_WT	Mindy2	0.130002	0.00601299	0.0829532	3530	3500
AETAm_vs_WT	Large1	-0.0747857	0.00602375	0.082958	7426.75	6378
AETAm_vs_WT	Kcnh7	0.190017	0.00602267	0.082958	2241.5	2312.25
AETAm_vs_WT	Acot13	-0.132759	0.00604383	0.0831627	1725.25	1428
AETAm_vs_WT	Slc12a4	0.497757	0.00606867	0.083421	918.75	1184
AETAm_vs_WT	Atr	0.203433	0.00608101	0.083421	603.25	628.5
AETAm_vs_WT	Celf5	-0.0992406	0.00608333	0.083421	17399.8	14779
AETAm_vs_WT	Slc2a6	-0.157414	0.00608354	0.083421	1121	913.25
AETAm_vs_WT	Hoatz	1.21985	0.00610276	0.0836126	16.75	34.25
AETAm_vs_WT	Gpx8	1.09185	0.00612283	0.0837435	131.75	259
AETAm_vs_WT	Avl9	0.140477	0.00612094	0.0837435	2790	2787.5
AETAm_vs_WT	Tsc22d2	0.12322	0.00613793	0.0838062	2157	2121
AETAm_vs_WT	Osbpl10	0.186491	0.00613279	0.0838062	707.5	731.75
AETAm_vs_WT	Spata2	-0.105676	0.0061474	0.0838636	3854.25	3245.25
AETAm_vs_WT	Fxyd1	0.381958	0.00616077	0.0839023	849.75	1014.5
AETAm_vs_WT	Hjurp	0.114094	0.00615984	0.0839023	2514.25	2464.75
AETAm_vs_WT	Rpl26	-0.0842547	0.00617514	0.0840263	5402	4613.5
AETAm_vs_WT	1810013L24Rik	0.156965	0.00618226	0.0840513	2506.5	2525.25
AETAm_vs_WT	Dynlrb2	0.659823	0.00618965	0.0840801	54.5	77
AETAm_vs_WT	Galnt12	0.580652	0.00619885	0.0841332	59	78.75
AETAm_vs_WT	Jade2	0.102047	0.00623092	0.0844966	4035.75	3914.5
AETAm_vs_WT	Ankrd11	0.152766	0.00625123	0.084628	11109.5	11111.8
AETAm_vs_WT	E530011L22Rik	0.281685	0.00624884	0.084628	304.5	336
AETAm_vs_WT	Med12	0.145195	0.00626824	0.0847862	2440	2425.25
AETAm_vs_WT	Smim1	0.301006	0.00629348	0.0850553	352	392
AETAm_vs_WT	Shank1	-0.112861	0.00631925	0.0853313	39961	33678.5
AETAm_vs_WT	Ucp3	-0.52837	0.00633318	0.0854267	95.25	60.5
AETAm_vs_WT	A230057D06Rik	0.219961	0.0063424	0.0854267	655	691.25
AETAm_vs_WT	Gm36742	-0.76917	0.00633787	0.0854267	66.25	35.75
AETAm_vs_WT	Sulf2	-0.094275	0.00636546	0.0856649	5912.5	5011.75
AETAm_vs_WT	Yeats2	0.141575	0.00638481	0.0858528	1862	1854.75
AETAm_vs_WT	Arhgap42	0.231458	0.00640585	0.086063	443	471.5
AETAm_vs_WT	Slc2a1	0.201663	0.00643774	0.0864186	3179.25	3319
AETAm_vs_WT	Syngap1	-0.0626642	0.00644471	0.0864394	22617	19656.5
AETAm_vs_WT	Bmp2k	0.168652	0.00646214	0.0865666	960	975
AETAm_vs_WT	Large2	1.89079	0.00647049	0.0865666	29.5	100.75
AETAm_vs_WT	Ube4a	0.120367	0.00646661	0.0865666	3385.75	3331
AETAm_vs_WT	Slc25a32	0.163031	0.00652801	0.0869711	845.75	853
AETAm_vs_WT	Gca	0.189737	0.00650951	0.0869711	580.25	602.25
AETAm_vs_WT	Itpka	-0.0841423	0.006517	0.0869711	7934	6764.25
AETAm_vs_WT	Fam199x	0.204968	0.00652732	0.0869711	696.5	726.5
AETAm_vs_WT	Col13a1	0.774241	0.00652559	0.0869711	53.25	85
AETAm_vs_WT	Gas2l2	1.06809	0.00654677	0.0871381	22.25	40
AETAm_vs_WT	Mt1	-0.115535	0.00655473	0.0871381	4282.25	3580.5
AETAm_vs_WT	Stox2	0.123039	0.00655696	0.0871381	6412.5	6320.25
AETAm_vs_WT	Wipf3	-0.0680669	0.0065665	0.0871921	26523.5	22855.8
AETAm_vs_WT	Pcca	0.165746	0.00660904	0.087684	1105.5	1123
AETAm_vs_WT	Csnk1g2	-0.0932655	0.00663855	0.0877831	6133	5211
AETAm_vs_WT	Pip4k2b	-0.06922	0.00662368	0.0877831	8333	7192.5
AETAm_vs_WT	Bhlhe22	-0.13711	0.00663378	0.0877831	4157.75	3419.25
AETAm_vs_WT	Col8a2	1.51333	0.00662868	0.0877831	367	973
AETAm_vs_WT	Mipol1	0.405346	0.00665113	0.0878766	117.75	140.75
AETAm_vs_WT	App	0.0496732	0.00667203	0.0880796	73922	69291
AETAm_vs_WT	Car4	-0.158087	0.0066916	0.0882648	1327.5	1077
AETAm_vs_WT	Ccdc60	0.939957	0.0067165	0.08852	44.75	75.25
AETAm_vs_WT	Bpnt2	0.105218	0.00673162	0.088646	5480	5360
AETAm_vs_WT	Plec	0.11489	0.00673823	0.0886597	12898.8	12653.8
AETAm_vs_WT	Med9	-0.147409	0.00674682	0.0886995	1467.5	1202.75
AETAm_vs_WT	Polk	0.191797	0.00675886	0.0887845	516	534
AETAm_vs_WT	Psmb3	-0.129145	0.00676698	0.0888181	1708.75	1410
AETAm_vs_WT	Ctsl	0.197971	0.00678094	0.088928	2438.75	2546
AETAm_vs_WT	Pik3c2a	0.187322	0.00679387	0.0889512	1361.25	1394.5
AETAm_vs_WT	Flvcr1	0.211721	0.00678872	0.0889512	688	721.75
AETAm_vs_WT	Pdzd2	0.208528	0.00682429	0.089276	2561.75	2673.25
AETAm_vs_WT	Chmp1a	-0.106745	0.00683049	0.0892838	3768.75	3164
AETAm_vs_WT	Rps21	-0.148481	0.00684201	0.0893611	3860.5	3129.5
AETAm_vs_WT	Fhod1	0.425401	0.00685946	0.0893693	144.25	177.25
AETAm_vs_WT	Stk39	0.383353	0.00685932	0.0893693	3060	3617.25
AETAm_vs_WT	Ndst1	0.121407	0.00685043	0.0893693	6368.5	6252.25
AETAm_vs_WT	Gm13340	-0.548719	0.00689329	0.0897367	106	64.5
AETAm_vs_WT	Atf7	0.151771	0.0069031	0.089791	2062.75	2077.75
AETAm_vs_WT	Rpl4	-0.0670843	0.00691066	0.089816	16035	13838.8
AETAm_vs_WT	Selenow	-0.0939356	0.00692153	0.089884	16771.5	14198
AETAm_vs_WT	Dnai4	0.407969	0.00693946	0.0900434	500.5	606.5
AETAm_vs_WT	Atxn7	0.150558	0.00694927	0.0900974	1905.75	1906.75
AETAm_vs_WT	Dipk2a	0.169093	0.00696753	0.0902607	1180	1201.5
AETAm_vs_WT	Ccdc177	-0.15979	0.00697823	0.0903259	1034.5	835.25
AETAm_vs_WT	Nudt3	-0.0770395	0.00699321	0.0904463	10960.2	9430.5
AETAm_vs_WT	Ptprd	0.165077	0.00706439	0.0911449	7617.25	7703
AETAm_vs_WT	Sostdc1	1.71889	0.00706102	0.0911449	295.75	923.5
AETAm_vs_WT	Carmil2	-0.0979095	0.00706417	0.0911449	2702.5	2284.5
AETAm_vs_WT	Cggbp1	0.117682	0.00709571	0.0914749	2865.75	2808
AETAm_vs_WT	Dip2a	0.105498	0.00711476	0.0915724	4076.5	3972.5
AETAm_vs_WT	Sike1	0.108302	0.00711376	0.0915724	2432	2377.25
AETAm_vs_WT	Galnt18	-0.130766	0.00712774	0.0916654	2059	1702.25
AETAm_vs_WT	Spty2d1	0.18052	0.00716397	0.0920571	1197.75	1234.5
AETAm_vs_WT	Cep126	0.208521	0.00717573	0.0921338	589.5	615.5
AETAm_vs_WT	Unc5b	-0.125371	0.0072263	0.0924119	1816.75	1501.5
AETAm_vs_WT	Galk1	0.291415	0.007208	0.0924119	257	284.25
AETAm_vs_WT	Pals1	0.111704	0.00722346	0.0924119	2137.75	2087.75
AETAm_vs_WT	Loxl1	0.534065	0.00722639	0.0924119	189	249.75
AETAm_vs_WT	Rapgefl1	-0.0991769	0.00721372	0.0924119	12940.8	10931.5
AETAm_vs_WT	Prr32	1.86383	0.00724076	0.0925214	79.25	267.25
AETAm_vs_WT	Pdpr	0.244456	0.00726939	0.0928129	1077.5	1151
AETAm_vs_WT	Sec63	0.0971661	0.00728743	0.0929688	3901.25	3781.25
AETAm_vs_WT	Zbtb40	0.24604	0.00730178	0.0930245	625.5	679.25
AETAm_vs_WT	Gm33869	0.402029	0.00730348	0.0930245	155.5	186.25
AETAm_vs_WT	Lbp	1.42003	0.00734136	0.0931658	340.75	847
AETAm_vs_WT	Stag2	0.0997164	0.00733233	0.0931658	3068.25	2980.75
AETAm_vs_WT	Phactr3	-0.0869049	0.00733611	0.0931658	5165.25	4408.75
AETAm_vs_WT	Hpca	-0.100359	0.00735421	0.0931658	49318.5	41514
AETAm_vs_WT	Creb3l2	0.222438	0.00734281	0.0931658	1067.5	1134.25
AETAm_vs_WT	Smg7	0.081287	0.0073555	0.0931658	5461.5	5216.5
AETAm_vs_WT	St6galnac2	0.830274	0.00734569	0.0931658	223	361.75
AETAm_vs_WT	Rpl37	-0.112063	0.00737695	0.0933632	4138.75	3456.5
AETAm_vs_WT	Itgb1	0.169847	0.00742172	0.0938553	2269.25	2318.5
AETAm_vs_WT	Sgpl1	0.13258	0.00742786	0.0938585	1580	1566.5
AETAm_vs_WT	Atp1b1	-0.0491268	0.0074441	0.0939891	79177	69301
AETAm_vs_WT	Lypla1	0.160518	0.00748353	0.0943374	1113.75	1132
AETAm_vs_WT	Exph5	0.453174	0.00747814	0.0943374	131	162.75
AETAm_vs_WT	Lamb2	0.269872	0.00749374	0.0943915	1482.5	1626
AETAm_vs_WT	Gnb1	-0.0535564	0.00750941	0.0945142	23331.2	20376
AETAm_vs_WT	Sncg	0.427768	0.00751921	0.0945628	105.75	128.5
AETAm_vs_WT	Grb2	-0.0735755	0.00753926	0.0947323	6725.25	5789
AETAm_vs_WT	Adamtsl1	0.193069	0.00754457	0.0947323	566.25	585.25
AETAm_vs_WT	Ctbp1	-0.0766285	0.00755166	0.0947466	8005	6869.25
AETAm_vs_WT	Synpo	-0.0917605	0.00756215	0.0948035	10200.2	8681
AETAm_vs_WT	Tmem50b	-0.0991826	0.00757009	0.0948284	3970.5	3368.75
AETAm_vs_WT	Gripap1	-0.0983115	0.00761984	0.0953427	4264	3611.5
AETAm_vs_WT	Prcd	0.586981	0.00762311	0.0953427	90.25	123.5
AETAm_vs_WT	Cast	0.340553	0.00763327	0.095395	421	485.75
AETAm_vs_WT	Ssrp1	-0.0862078	0.00764508	0.0954168	4065.5	3462.75
AETAm_vs_WT	Tenm4	0.166476	0.007647	0.0954168	6213.25	6332.75
AETAm_vs_WT	Insr	0.153309	0.00766045	0.0954352	2934.5	2941
AETAm_vs_WT	Nktr	0.120328	0.0076585	0.0954352	7226	7122.5
AETAm_vs_WT	Ccdc170	0.66223	0.00767293	0.0954414	69	97.75
AETAm_vs_WT	Trhr	-0.343644	0.0076671	0.0954414	380.5	273.5
AETAm_vs_WT	Ciao2b	-0.208689	0.00767935	0.0954468	486.75	381.75
AETAm_vs_WT	Coro1a	-0.10332	0.00769505	0.0955674	2779.5	2338
AETAm_vs_WT	Rpl35a-ps2	-9.01618	0.00771588	0.0957514	115.25	0
AETAm_vs_WT	Fgfr2	0.170898	0.00774603	0.0960508	2582.25	2620.75
AETAm_vs_WT	Socs6	0.157906	0.00776545	0.0962167	808	816.5
AETAm_vs_WT	Cyb5r3	0.113951	0.00778883	0.0963595	2467.5	2408
AETAm_vs_WT	Panx2	-0.158142	0.00779329	0.0963595	5759	4704.25
AETAm_vs_WT	Snrpa	-0.136183	0.00779512	0.0963595	2082.5	1725.25
AETAm_vs_WT	Kcnc3	-0.0995768	0.00782248	0.0966228	12962	10944.2
AETAm_vs_WT	Med28	-0.120593	0.00786614	0.0967122	2013.75	1678.5
AETAm_vs_WT	Slc38a2	0.177813	0.00786392	0.0967122	5445.5	5578.25
AETAm_vs_WT	Lrch3	0.107513	0.00785805	0.0967122	2137.25	2084.25
AETAm_vs_WT	Slitrk5	-0.118562	0.00784285	0.0967122	3830.25	3195
AETAm_vs_WT	Efcab14	0.115056	0.00785736	0.0967122	2449.75	2410.25
AETAm_vs_WT	Tnfaip8	0.491555	0.00786168	0.0967122	229.5	294.75
AETAm_vs_WT	Reep6	-0.26162	0.00788507	0.0968052	394.75	297.5
AETAm_vs_WT	Cnst	0.134219	0.00789083	0.0968052	2071	2063.75
AETAm_vs_WT	Kl	1.42967	0.007898	0.0968052	2759	6951.75
AETAm_vs_WT	Shroom4	0.233618	0.00789685	0.0968052	344.75	366.75
AETAm_vs_WT	Gm5148	-0.290543	0.00791075	0.0968869	270.5	202
AETAm_vs_WT	Ddx4	-0.446535	0.00794327	0.0972106	200.75	130.75
AETAm_vs_WT	Adprh	-0.0939557	0.00795332	0.0972587	2778	2357.25
AETAm_vs_WT	Ubr2	0.100725	0.00798647	0.0975893	4517.25	4386
AETAm_vs_WT	Rbm27	0.148055	0.00799406	0.0976072	2071.25	2069.75
AETAm_vs_WT	Sptlc2	0.149227	0.00801416	0.0977376	1457.75	1461.5
AETAm_vs_WT	Cx3cr1	-0.146818	0.00801701	0.0977376	2086.75	1713.5
AETAm_vs_WT	Mast3	-0.0782739	0.00803771	0.097915	22637.5	19376.5
AETAm_vs_WT	Clk1	0.145362	0.00805726	0.0980712	5802	5802.75
AETAm_vs_WT	Iqcg	0.47377	0.00806284	0.0980712	171.5	211
AETAm_vs_WT	Pea15a	-0.0830473	0.00807704	0.098169	21377.8	18234.5
AETAm_vs_WT	Fndc3a	0.137496	0.00810909	0.0984781	2863.25	2858
AETAm_vs_WT	Bmp6	0.839099	0.00811483	0.0984781	444	733
AETAm_vs_WT	Ppp2ca	-0.061769	0.00814382	0.0986713	14541.8	12584.5
AETAm_vs_WT	Krt18	1.48394	0.00814183	0.0986713	89.5	230.75
AETAm_vs_WT	Rtf2	-0.103284	0.00814933	0.0986713	2693	2264.75
AETAm_vs_WT	Podn	0.379733	0.00823675	0.0993523	185.75	220.25
AETAm_vs_WT	Gabarapl1	-0.0651096	0.00821968	0.0993523	20631.2	17820
AETAm_vs_WT	Bmerb1	-0.0977547	0.00822972	0.0993523	8599.25	7297.75
AETAm_vs_WT	Zfp706	-0.0771993	0.0082276	0.0993523	8353	7181
AETAm_vs_WT	Peak1	0.13714	0.00823518	0.0993523	3687.25	3657.25
AETAm_vs_WT	Pigyl	-0.210698	0.00824548	0.0993797	574.75	449.25
AETAm_vs_WT	Kif27	0.450265	0.00825149	0.0993797	200.75	252.25
AETAm_vs_WT	Ankrd63	0.259746	0.00826983	0.0995253	1112.25	1193.5
AETAm_vs_WT	Hey2	0.435156	0.0082814	0.0995893	182.75	226.25
AETAm_vs_WT	Snx3	-0.0989461	0.00829994	0.0996593	4683.5	3967.25
AETAm_vs_WT	Cdr2	0.896966	0.00830598	0.0996593	424.25	717.75
AETAm_vs_WT	Zfp217	0.290698	0.00830407	0.0996593	199.75	221.5
AETAm_vs_WT	Thbs1	0.845174	0.00831794	0.0997277	190.25	323.5
AETAm_vs_WT	Me2	0.177277	0.0083333	0.0997617	781.5	797.5
AETAm_vs_WT	Nol12	-0.167829	0.00833292	0.0997617	678.25	547
AETAm_vs_WT	Ubc	-0.145343	0.00838827	0.100229	8266	6781.5
AETAm_vs_WT	Zfp266	0.146762	0.00839121	0.100229	1978.25	1977.25
AETAm_vs_WT	Zic3	0.826922	0.00838837	0.100229	108.25	168
AETAm_vs_WT	Cad	-0.156228	0.00842007	0.100348	1120	913.75
AETAm_vs_WT	Uchl1	-0.0886847	0.00841534	0.100348	16234.2	13788.5
AETAm_vs_WT	Fbxl2	-0.144801	0.00841321	0.100348	1746.25	1437
AETAm_vs_WT	Gm11992	0.507573	0.00844677	0.100591	92.75	117.25
AETAm_vs_WT	Ano1	0.624567	0.00845686	0.100636	169.5	233.5
AETAm_vs_WT	Dmp1	-0.35273	0.00846654	0.100676	247.5	178.75
AETAm_vs_WT	Gna13	0.121742	0.00848679	0.100691	2730.25	2670.5
AETAm_vs_WT	Cnnm1	-0.0843095	0.00847431	0.100691	7293.5	6236
AETAm_vs_WT	Pvr	0.237659	0.00848296	0.100691	433.25	463
AETAm_vs_WT	Sash1	0.0837827	0.00850034	0.100736	5555.5	5327
AETAm_vs_WT	Csf1r	-0.119613	0.00851587	0.100736	3780.5	3153.75
AETAm_vs_WT	Hps1	-0.14732	0.0085158	0.100736	1142	934.5
AETAm_vs_WT	Ndufaf5	-0.166453	0.00850357	0.100736	836.5	673.5
AETAm_vs_WT	Rin1	-0.0919721	0.00852498	0.100752	4249.25	3606.75
AETAm_vs_WT	Ptcd1	0.142811	0.00852981	0.100752	1148.5	1144.75
AETAm_vs_WT	Cdk12	0.140798	0.00857135	0.10086	1394.5	1390.5
AETAm_vs_WT	Nxn	0.422082	0.00857987	0.10086	414.75	508.25
AETAm_vs_WT	Creb1	0.122443	0.00860008	0.10086	2674.25	2630
AETAm_vs_WT	Golga4	0.128359	0.00860229	0.10086	4283	4259.25
AETAm_vs_WT	Daw1	0.866995	0.00857106	0.10086	26.5	42.5
AETAm_vs_WT	Tgoln1	0.103365	0.00857178	0.10086	7944.25	7740.75
AETAm_vs_WT	Nbeal2	0.166366	0.00858019	0.10086	992.75	1002.75
AETAm_vs_WT	Cped1	0.546142	0.0085933	0.10086	166.5	227.25
AETAm_vs_WT	Tuba1a	-0.0600247	0.00857551	0.10086	32367.2	28126
AETAm_vs_WT	Gm3764	-0.100691	0.00859748	0.10086	6031.25	5105.5
AETAm_vs_WT	Mtfr1	0.412167	0.00862347	0.101034	282.75	340.75
AETAm_vs_WT	Adora1	-0.0681923	0.00863375	0.10108	13280.8	11482.5
AETAm_vs_WT	Suds3	-0.0833211	0.0086476	0.101168	4347	3711.5
AETAm_vs_WT	Taok1	0.13551	0.00866871	0.101341	7575.75	7525.5
AETAm_vs_WT	Olfml3	-0.247826	0.00869792	0.101533	780.75	602.75
AETAm_vs_WT	Il17re	1.37656	0.00869641	0.101533	24	59.5
AETAm_vs_WT	Mxra8	0.37872	0.0087154	0.101658	253.5	299.5
AETAm_vs_WT	Dnlz	-0.129793	0.00872136	0.101658	1367.25	1132.75
AETAm_vs_WT	Tet2	0.14478	0.00874542	0.101864	2143	2139.75
AETAm_vs_WT	Rassf7	0.748318	0.00877458	0.102065	23.5	35.75
AETAm_vs_WT	Tceal3	-0.104158	0.00877549	0.102065	4295.5	3607
AETAm_vs_WT	Cog1	-0.110141	0.00882873	0.102608	2428.75	2043.25
AETAm_vs_WT	Dcdc2a	0.25735	0.00883537	0.102608	531.5	573.5
AETAm_vs_WT	Spop	-0.0617313	0.00884796	0.102608	7704	6679
AETAm_vs_WT	Gm43843	0.389979	0.00884494	0.102608	271.25	319.5
AETAm_vs_WT	B130046B21Rik	-0.28877	0.00886443	0.102724	285	210.5
AETAm_vs_WT	Paqr5	0.488494	0.00888314	0.102866	136.75	174.5
AETAm_vs_WT	Sp4	0.200312	0.00890466	0.103041	1103	1152.75
AETAm_vs_WT	Cp	0.537813	0.00891767	0.103116	618.75	826
AETAm_vs_WT	Slc29a1	-0.195722	0.00893823	0.103279	766	606.75
AETAm_vs_WT	Ablim1	0.105332	0.00895929	0.103447	5240.75	5097.75
AETAm_vs_WT	Stk36	0.348964	0.00897878	0.103532	262.25	304.25
AETAm_vs_WT	Pura	0.158949	0.00897965	0.103532	1654.5	1668.5
AETAm_vs_WT	1700088E04Rik	0.383717	0.00900285	0.103725	134.75	159
AETAm_vs_WT	Smpd4	-0.116867	0.0090112	0.103735	2886	2423
AETAm_vs_WT	Cxcl5	1.01118	0.00902014	0.103735	30	54.25
AETAm_vs_WT	Dennd11	0.0984989	0.00902322	0.103735	4097.25	3959.25
AETAm_vs_WT	1110051M20Rik	-0.104665	0.00911648	0.104731	3322.25	2799.75
AETAm_vs_WT	Tns2	0.203404	0.00912313	0.104732	957.75	1002
AETAm_vs_WT	Mapk1ip1l	0.109166	0.00914752	0.104874	2634	2570
AETAm_vs_WT	Pkig	-0.118088	0.00914864	0.104874	1800.75	1507.75
AETAm_vs_WT	Dnah2	0.320348	0.00916517	0.104912	306.75	346.75
AETAm_vs_WT	Gm38190	0.448147	0.00916091	0.104912	149.75	181.5
AETAm_vs_WT	Crebbp	0.11046	0.00918696	0.105086	4258.5	4149.5
AETAm_vs_WT	Drc3	0.298799	0.00919623	0.105117	358.5	396
AETAm_vs_WT	Mtx3	0.101982	0.00922501	0.10537	2932.25	2838.75
AETAm_vs_WT	Enpp2	1.58414	0.00924674	0.105543	22859	64671.5
AETAm_vs_WT	Syt17	-0.12423	0.00927641	0.105806	4088.5	3387.75
AETAm_vs_WT	Car12	0.529275	0.00930058	0.106005	2575.75	3397.5
AETAm_vs_WT	Sumf1	0.158339	0.00931472	0.106091	852.5	862
AETAm_vs_WT	Eif4a2	-0.0656961	0.00935622	0.106487	25163.8	21788.8
AETAm_vs_WT	Pcyt1a	0.147211	0.00942969	0.10717	1485.75	1482.25
AETAm_vs_WT	Rbm47	1.56483	0.0094271	0.10717	140.5	386
AETAm_vs_WT	Pgap1	0.161402	0.00944766	0.107298	1301.75	1321.5
AETAm_vs_WT	Srcap	0.124267	0.00946715	0.107443	7379.75	7315.5
AETAm_vs_WT	Strip2	0.569404	0.00951274	0.107816	1800.25	2449.5
AETAm_vs_WT	A330102I10Rik	-0.232469	0.00951361	0.107816	363.75	281.25
AETAm_vs_WT	Pcyox1l	-0.154594	0.00952415	0.107859	954	777.25
AETAm_vs_WT	Arrdc2	0.217769	0.0095561	0.108067	422.25	447.25
AETAm_vs_WT	Ptar1	0.122531	0.00955116	0.108067	2420.5	2387.75
AETAm_vs_WT	Col4a6	0.806613	0.00956569	0.108099	57.5	95
AETAm_vs_WT	Bmpr1a	0.12029	0.00958706	0.108264	2551	2507.5
AETAm_vs_WT	Plppr2	-0.0975336	0.00959402	0.108266	12335.8	10399
AETAm_vs_WT	Pcmt1	-0.0799835	0.00962392	0.108526	5671	4864.75
AETAm_vs_WT	Otx2	1.77498	0.00964865	0.108728	205.75	649.25
AETAm_vs_WT	Zkscan7	0.23928	0.00966794	0.108869	291.5	311.5
AETAm_vs_WT	Dtx2	0.214572	0.00969736	0.109123	344.25	361.5
AETAm_vs_WT	Gtf2ird1	0.224942	0.0097156	0.109251	818.75	869
AETAm_vs_WT	Usp24	0.134169	0.00972278	0.109254	4374.5	4322.75
AETAm_vs_WT	Sh3bgrl3	-0.11808	0.00975212	0.109507	3211.75	2673.75
AETAm_vs_WT	Pla2g5	1.53058	0.00979925	0.109959	79.25	212.75
AETAm_vs_WT	Ro60	0.163378	0.00983932	0.110005	2900.5	2942.75
AETAm_vs_WT	Larp4	0.137998	0.00985175	0.110005	2559.75	2546.5
AETAm_vs_WT	Unc5a	-0.12348	0.00983653	0.110005	8413	6990.25
AETAm_vs_WT	Lrp8	0.0996848	0.00984868	0.110005	4531.75	4384.25
AETAm_vs_WT	Togaram1	0.110967	0.00983936	0.110005	2743.75	2680.5
AETAm_vs_WT	Mrps26	-0.126873	0.00981194	0.110005	1554.25	1284.75
AETAm_vs_WT	Klhl11	0.268151	0.00984078	0.110005	978	1055.25
AETAm_vs_WT	Nrde2	-0.203352	0.00986609	0.110088	692.5	547.75
AETAm_vs_WT	Tmf1	0.140262	0.00989533	0.11026	1609.5	1615.75
AETAm_vs_WT	Inppl1	0.144557	0.00989084	0.11026	1346	1347.75
AETAm_vs_WT	Mlf1	0.698194	0.00991137	0.110362	57	83.25
AETAm_vs_WT	Gas6	0.313224	0.00993612	0.11056	3679.75	4163.25
AETAm_vs_WT	Arhgdib	0.308203	0.00996804	0.110838	262	293
AETAm_vs_WT	Tmem50a	-0.100588	0.0100031	0.11115	2578	2177.5
AETAm_vs_WT	Ubb	-0.112201	0.0100347	0.111346	42309.8	35521.2
AETAm_vs_WT	Gm35339	-0.202463	0.0100283	0.111346	618.5	485
AETAm_vs_WT	Gm9885	-0.30971	0.010043	0.11136	199.25	145.75
AETAm_vs_WT	Irag1	0.442526	0.0100752	0.11164	133.75	166.5
AETAm_vs_WT	Sdc4	0.13001	0.010121	0.111921	2460.25	2439.25
AETAm_vs_WT	Sesn3	0.153364	0.0101154	0.111921	6037.25	6048.5
AETAm_vs_WT	Kank2	0.295149	0.0101327	0.111921	572	638.25
AETAm_vs_WT	Map3k9	0.245591	0.0101259	0.111921	1066.75	1154.25
AETAm_vs_WT	Tcf7l1	0.323671	0.0101426	0.111921	158.25	180
AETAm_vs_WT	Serpinh1	0.567344	0.0101427	0.111921	663.75	902.75
AETAm_vs_WT	Myo5c	1.32674	0.0101819	0.112276	75.25	176.25
AETAm_vs_WT	Arl5b	0.20617	0.0102063	0.112466	1516.75	1593.5
AETAm_vs_WT	Dynll2	-0.0687695	0.01027	0.11309	22312.5	19272.2
AETAm_vs_WT	Emilin1	0.551969	0.0102771	0.11309	125.5	172
AETAm_vs_WT	Lzts3	-0.0829219	0.0102898	0.113153	11501	9833.5
AETAm_vs_WT	Atp10d	0.3605	0.010319	0.113395	146.75	169.25
AETAm_vs_WT	Mtmr4	0.112961	0.0103274	0.113409	4528.5	4432.75
AETAm_vs_WT	Plin5	0.892153	0.0103401	0.113411	23.75	39.25
AETAm_vs_WT	Mtcl1	0.179723	0.0103418	0.113411	2474.5	2544
AETAm_vs_WT	Kansl3	0.0897404	0.0103537	0.113463	3938.75	3785.75
AETAm_vs_WT	Atp13a3	0.160095	0.0103645	0.113504	3812.5	3858.25
AETAm_vs_WT	Timp4	-0.189998	0.0103813	0.11361	1057.75	844
AETAm_vs_WT	Ptgfrn	0.289278	0.0104028	0.113766	647.25	722
AETAm_vs_WT	Per3	0.173127	0.0104126	0.113796	2032	2075
AETAm_vs_WT	Igf2os	0.987873	0.0104222	0.113822	18.5	33.75
AETAm_vs_WT	Trim32	-0.0664024	0.0104324	0.113856	7576.5	6555.75
AETAm_vs_WT	Zfhx4	0.20037	0.0104616	0.114018	559	579.75
AETAm_vs_WT	Adamts17	-0.223018	0.010458	0.114018	405.25	314.75
AETAm_vs_WT	Gm43481	0.300576	0.0105003	0.114362	271.5	300.5
AETAm_vs_WT	Cep97	0.147574	0.0105406	0.114723	1338.25	1335.75
AETAm_vs_WT	Slc13a4	1.44057	0.0105691	0.114901	505.75	1313.5
AETAm_vs_WT	Chst2	-0.0848643	0.0105787	0.114901	7581.75	6465
AETAm_vs_WT	Slc24a5	1.78925	0.010573	0.114901	40.75	134.75
AETAm_vs_WT	Pja1	-0.0759078	0.0106142	0.115209	8444.75	7254
AETAm_vs_WT	Pex6	-0.127033	0.0106516	0.115458	2741	2278.75
AETAm_vs_WT	L3mbtl3	0.202698	0.0106461	0.115458	1059.25	1112.75
AETAm_vs_WT	Tmub2	-0.112728	0.0106871	0.115763	2571.75	2162
AETAm_vs_WT	2900040C04Rik	1.66374	0.0107081	0.115913	75	221
AETAm_vs_WT	Stxbp3	0.218534	0.0107664	0.116464	818	857.25
AETAm_vs_WT	Kif16b	0.183665	0.0108465	0.117172	670.5	690.25
AETAm_vs_WT	Aarsd1	-0.127893	0.0108465	0.117172	1556.25	1283.5
AETAm_vs_WT	Ctsd	0.172167	0.0108715	0.117309	12300.5	12605
AETAm_vs_WT	Il13ra1	0.398735	0.0108739	0.117309	213	256
AETAm_vs_WT	Nbea	0.13777	0.0109015	0.117447	14406.2	14269
AETAm_vs_WT	Hinfp	0.141778	0.0108964	0.117447	1229.75	1225.5
AETAm_vs_WT	Fam163b	-0.160618	0.0109233	0.117602	8022.5	6475
AETAm_vs_WT	Czib	-0.107013	0.0109494	0.117661	2004.5	1689.25
AETAm_vs_WT	C1qtnf5	0.362418	0.0109509	0.117661	232.5	270
AETAm_vs_WT	2810414N06Rik	-0.588668	0.0109433	0.117661	74.25	44.5
AETAm_vs_WT	Psmd3	-0.07856	0.0109632	0.117669	4671.5	4005.5
AETAm_vs_WT	Pon3	1.22624	0.0109738	0.117669	131.25	285.5
AETAm_vs_WT	Ankfn1	1.10673	0.0109712	0.117669	29.5	55.25
AETAm_vs_WT	Itga5	0.583715	0.0110178	0.117762	92.75	127.5
AETAm_vs_WT	Emp2	0.197422	0.0109988	0.117762	977.75	1011.75
AETAm_vs_WT	Src	-0.0676562	0.0110193	0.117762	6752.75	5831.5
AETAm_vs_WT	Yars	-0.0828788	0.0110035	0.117762	3806.5	3250
AETAm_vs_WT	Resf1	0.228936	0.0110268	0.117762	582	617.75
AETAm_vs_WT	Gm43517	0.35131	0.0110206	0.117762	122.5	141.25
AETAm_vs_WT	Jph4	-0.0833203	0.011059	0.118027	24846.5	21210.8
AETAm_vs_WT	Ttc9c	0.120669	0.0110882	0.118259	1519	1491.5
AETAm_vs_WT	Nt5dc2	0.321212	0.0111032	0.11834	220.75	251.25
AETAm_vs_WT	Mtdh	0.0905825	0.011131	0.118557	4012.75	3871.25
AETAm_vs_WT	Scara5	1.62622	0.0111809	0.11893	44.75	129.5
AETAm_vs_WT	Bhlhb9	-0.115965	0.0111751	0.11893	3348.5	2806.75
AETAm_vs_WT	Tns3	0.107557	0.0112063	0.119121	3721.25	3635.25
AETAm_vs_WT	Vps9d1	-0.116802	0.0112313	0.119307	2263	1888.25
AETAm_vs_WT	Ppp2cb	-0.0844594	0.0112663	0.119549	3530.5	3019.75
AETAm_vs_WT	Ndufb3	-0.128386	0.0112692	0.119549	1755.25	1456
AETAm_vs_WT	Epn1	-0.0765441	0.0112838	0.119567	17341.8	14887
AETAm_vs_WT	Ubald1	-0.102872	0.0112859	0.119567	4866	4116.25
AETAm_vs_WT	Abhd16a	-0.109753	0.0113175	0.119704	2396	2014
AETAm_vs_WT	Pik3c2b	0.141353	0.0113213	0.119704	1434.25	1425.75
AETAm_vs_WT	C1s1	0.60292	0.0113134	0.119704	79	109.5
AETAm_vs_WT	Cct8	-0.0670969	0.0113401	0.119823	6334.25	5480.25
AETAm_vs_WT	Bop1	-0.115613	0.0113609	0.119963	2118.5	1765.25
AETAm_vs_WT	Pttg1ip	0.112119	0.0114084	0.120142	2196.75	2150.25
AETAm_vs_WT	Fabp7	-0.230208	0.0114203	0.120142	668.75	511.5
AETAm_vs_WT	Plekha6	0.0843386	0.0114002	0.120142	5058.25	4847.75
AETAm_vs_WT	Cep170	0.132027	0.0114192	0.120142	3840	3800
AETAm_vs_WT	Flnc	0.385101	0.0114231	0.120142	192.25	225.75
AETAm_vs_WT	Gm44423	0.703323	0.0114106	0.120142	40.25	59
AETAm_vs_WT	Sfrp5	1.99597	0.0114333	0.12017	18.5	67.75
AETAm_vs_WT	Eef1e1	-0.17234	0.011452	0.120288	682.25	547
AETAm_vs_WT	Tnfrsf21	-0.0713296	0.0115019	0.120366	5828.25	5020
AETAm_vs_WT	Slc4a2	0.873786	0.0115122	0.120366	1860.75	3149.25
AETAm_vs_WT	Cd99l2	-0.115311	0.011514	0.120366	3167.25	2659
AETAm_vs_WT	Cd2bp2	-0.0959033	0.01148	0.120366	3794.25	3217.25
AETAm_vs_WT	Rgs8	-0.0794948	0.0115199	0.120366	5092	4356.75
AETAm_vs_WT	Bdp1	0.221228	0.0115124	0.120366	1638.25	1714.75
AETAm_vs_WT	Tnrc6a	0.127036	0.0114962	0.120366	4138.75	4080
AETAm_vs_WT	Spef2	0.409675	0.0114702	0.120366	237.25	287
AETAm_vs_WT	Gprc5c	0.55257	0.0115427	0.120525	196	265.25
AETAm_vs_WT	Plekha8	0.157097	0.0115819	0.120617	873.75	879
AETAm_vs_WT	Prkar2a	0.0905664	0.0115774	0.120617	2795	2690.75
AETAm_vs_WT	Jcad	0.117842	0.0115956	0.120617	3908.75	3842
AETAm_vs_WT	H1f4	-0.550043	0.0115756	0.120617	78.25	48.75
AETAm_vs_WT	Dbp	0.159386	0.0115969	0.120617	1634	1661.75
AETAm_vs_WT	ENSMUSG00000120237	0.328873	0.0115895	0.120617	207	237.5
AETAm_vs_WT	Sbsn	-0.252524	0.0116283	0.120864	412.75	314.25
AETAm_vs_WT	Slc38a1	0.0961959	0.0116598	0.120883	8167.25	7908.25
AETAm_vs_WT	Frzb	-0.170939	0.0116604	0.120883	1084.5	869.5
AETAm_vs_WT	Drc7	1.40643	0.0116595	0.120883	331.25	801.5
AETAm_vs_WT	Chd8	0.122476	0.0116406	0.120883	5055.75	4957.5
AETAm_vs_WT	R3hdm4	-0.0685408	0.0116829	0.121037	12224.2	10548
AETAm_vs_WT	Rps8	-0.0775707	0.0117093	0.121232	7453.25	6408.25
AETAm_vs_WT	Bst2	0.473498	0.0117349	0.121418	114.75	144.75
AETAm_vs_WT	Ppp3r1	-0.0666804	0.0117655	0.121577	45788.5	39562.5
AETAm_vs_WT	Cnot1	0.159459	0.0117592	0.121577	5795.75	5827.75
AETAm_vs_WT	Trnp1	-0.137609	0.0118214	0.121997	4700.5	3870.75
AETAm_vs_WT	Tmem178b	0.136394	0.0118144	0.121997	6781.75	6736.75
AETAm_vs_WT	Rd3	0.918713	0.0118562	0.122276	43.5	74.5
AETAm_vs_WT	Stx1b	-0.0713461	0.0118815	0.122379	24039.2	20779
AETAm_vs_WT	Ccdc189	0.311089	0.0118749	0.122379	197.25	222.25
AETAm_vs_WT	Dnajc1	0.147859	0.0119008	0.122457	1394.75	1396.75
AETAm_vs_WT	Hook3	0.143953	0.0119352	0.122457	3786	3776.25
AETAm_vs_WT	Klhl15	0.159256	0.0119346	0.122457	860	873.75
AETAm_vs_WT	Vwa8	0.133991	0.0119206	0.122457	2007.25	1980.25
AETAm_vs_WT	Gm2415	-0.141325	0.0119061	0.122457	1045.75	857
AETAm_vs_WT	Rbm4	0.140632	0.0119282	0.122457	806.25	804.75
AETAm_vs_WT	Kif1b	0.161932	0.0119565	0.122597	36028.2	36256.5
AETAm_vs_WT	Aip	-0.114229	0.0119836	0.122795	2120	1778
AETAm_vs_WT	Lox	0.949467	0.0120161	0.123049	28	51
AETAm_vs_WT	C2cd4c	-0.15676	0.0120755	0.123578	881	714
AETAm_vs_WT	Ecm1	0.34938	0.0120882	0.123629	219.25	255.25
AETAm_vs_WT	Itch	0.0897115	0.0121194	0.123709	3264.5	3147.25
AETAm_vs_WT	Ypel3	-0.107525	0.0121118	0.123709	5255.5	4429.5
AETAm_vs_WT	Crb3	1.24057	0.0121057	0.123709	24.75	54.25
AETAm_vs_WT	Spata17	0.959267	0.0121679	0.123966	19	34
AETAm_vs_WT	Abca4	1.81943	0.0121607	0.123966	370.75	1243.75
AETAm_vs_WT	Csdc2	-0.10128	0.0121676	0.123966	3637	3067
AETAm_vs_WT	Pld1	0.250974	0.0122068	0.124125	347.5	374.75
AETAm_vs_WT	Slc2a12	1.42926	0.0121932	0.124125	347	873.25
AETAm_vs_WT	Rbm12b1	0.221683	0.0121999	0.124125	688.75	719.75
AETAm_vs_WT	Plcb4	0.216089	0.012231	0.124247	1054.75	1113.5
AETAm_vs_WT	Wdfy1	0.580178	0.0122344	0.124247	864.5	1164.5
AETAm_vs_WT	Mapk8ip3	-0.0630979	0.0122801	0.124412	25375	22041.8
AETAm_vs_WT	B3galt6	-0.195705	0.0122726	0.124412	564	443.75
AETAm_vs_WT	Dnajc30	-0.163742	0.0122763	0.124412	1242.5	1008.25
AETAm_vs_WT	Olfr1372-ps1	0.70773	0.0122819	0.124412	29	43
AETAm_vs_WT	Smim5	0.775094	0.012306	0.124577	28.5	43.75
AETAm_vs_WT	Grid1	-0.101599	0.0123193	0.124632	3368.5	2850.75
AETAm_vs_WT	Ndufs2	-0.0697424	0.0123717	0.124948	6360.25	5479
AETAm_vs_WT	Bmpr2	0.14769	0.0123595	0.124948	8147.5	8203.5
AETAm_vs_WT	Mia	0.654426	0.012374	0.124948	49.25	68.25
AETAm_vs_WT	Cldn19	0.752411	0.0123843	0.124973	21.5	33
AETAm_vs_WT	Slfn5	0.288811	0.0124212	0.125265	330.75	367.5
AETAm_vs_WT	Spock2	-0.0739408	0.0124449	0.125425	43915.8	37901.2
AETAm_vs_WT	Eaf1	0.154346	0.0125229	0.126131	986.25	995.75
AETAm_vs_WT	Hras	-0.107226	0.0125756	0.126545	2932.75	2458.5
AETAm_vs_WT	Cnrip1	-0.0893228	0.0125799	0.126545	3164.25	2687
AETAm_vs_WT	Slc25a14	-0.121917	0.0126029	0.126697	1476.25	1233.75
AETAm_vs_WT	Lactb2	0.212531	0.0126722	0.127234	609.75	635.25
AETAm_vs_WT	Crym	-0.128565	0.0126675	0.127234	7378.75	6077.5
AETAm_vs_WT	Kansl1l	0.176348	0.0126935	0.127367	675.25	687.5
AETAm_vs_WT	Cep250	0.0999357	0.0127075	0.127427	2565	2488
AETAm_vs_WT	Bcorl1	0.121598	0.0127218	0.12749	1460	1434.25
AETAm_vs_WT	Zfp277	-0.146646	0.0127407	0.127599	900.75	736.75
AETAm_vs_WT	Cnbp	-0.0732429	0.012796	0.128012	8081	6936.5
AETAm_vs_WT	1700016K19Rik	0.576919	0.012798	0.128012	49.25	65.75
AETAm_vs_WT	Tmem47	0.108121	0.0128173	0.128125	5600.5	5477.75
AETAm_vs_WT	Camsap2	0.128209	0.0128346	0.128217	8762.25	8652.5
AETAm_vs_WT	Fgf13	-0.0902209	0.0128526	0.128235	8038.5	6823.25
AETAm_vs_WT	Larp4b	0.105639	0.0128501	0.128235	3966.75	3868.5
AETAm_vs_WT	Zfp580	-0.185706	0.0128605	0.128235	602.5	477.75
AETAm_vs_WT	Shprh	0.125981	0.0128725	0.128275	2534	2492.75
AETAm_vs_WT	Zfp971	0.295695	0.0128856	0.128324	335	368.75
AETAm_vs_WT	Tecpr2	0.110628	0.0129334	0.128559	4421.25	4302.25
AETAm_vs_WT	Slc9a7	0.365415	0.0129215	0.128559	506.5	585
AETAm_vs_WT	Dlgap3	-0.101208	0.0129284	0.128559	13416.2	11343
AETAm_vs_WT	Lrguk	0.321301	0.0129576	0.128559	228	254.5
AETAm_vs_WT	Zfp804b	0.866264	0.0129512	0.128559	23	36.5
AETAm_vs_WT	Gm44250	1.30179	0.012949	0.128559	243.25	566
AETAm_vs_WT	Syp	-0.0632311	0.0129657	0.12856	52583.2	45550.2
AETAm_vs_WT	Elmo2	-0.064068	0.012988	0.128701	7980.5	6907.25
AETAm_vs_WT	Hmgb3	0.204442	0.0130684	0.128872	453	471.75
AETAm_vs_WT	Ppa1	-0.0985244	0.0130539	0.128872	2357.5	1993.25
AETAm_vs_WT	Higd2a	-0.107738	0.0130595	0.128872	1975.5	1658.75
AETAm_vs_WT	Npy	-0.186717	0.0130487	0.128872	1401.75	1111.25
AETAm_vs_WT	Begain	-0.0717092	0.0130365	0.128872	5826	5010.75
AETAm_vs_WT	Disp3	-0.124632	0.01307	0.128872	2011	1674.25
AETAm_vs_WT	Rpl37a	-0.1054	0.0130573	0.128872	3103.25	2614.5
AETAm_vs_WT	Cisd3	-0.198133	0.0130168	0.128872	521.75	411.75
AETAm_vs_WT	Sh3bgrl2	0.193308	0.0131069	0.129156	1389.75	1442.75
AETAm_vs_WT	Kifc2	-0.0702591	0.0132044	0.129956	19808.8	17114.5
AETAm_vs_WT	Rcor1	0.13269	0.0131967	0.129956	1434.25	1422
AETAm_vs_WT	Mmp2	0.421086	0.013239	0.130136	119	146.25
AETAm_vs_WT	Mdm4	0.141561	0.0132364	0.130136	4395.25	4373
AETAm_vs_WT	Lamp5	-0.172283	0.0132737	0.130316	1245.5	1007.25
AETAm_vs_WT	Ginm1	0.194712	0.0132729	0.130316	587.75	609.75
AETAm_vs_WT	Tram1l1	-0.149949	0.013297	0.130464	1122.75	917.5
AETAm_vs_WT	BC005624	-0.0957706	0.0133333	0.13074	2572.75	2185.25
AETAm_vs_WT	Pde2a	-0.070804	0.0133979	0.131293	18424.8	15928
AETAm_vs_WT	BC003965	-0.145385	0.0134147	0.131377	1210.25	992.25
AETAm_vs_WT	C630043F03Rik	-0.195099	0.0134298	0.131444	570.75	453.5
AETAm_vs_WT	Colec12	0.47932	0.0134452	0.13148	338.25	433.75
AETAm_vs_WT	B4gat1	-0.0907867	0.0134501	0.13148	3776.25	3204.5
AETAm_vs_WT	Cdh9	-0.192798	0.0134949	0.131838	1985.5	1583.75
AETAm_vs_WT	Lyst	0.139406	0.0135152	0.131951	3916	3879.25
AETAm_vs_WT	Tceal6	-0.115108	0.0135478	0.131951	2202.25	1842
AETAm_vs_WT	Nt5dc1	0.418402	0.0135313	0.131951	103	125.75
AETAm_vs_WT	Dync2h1	0.164275	0.0135427	0.131951	1507	1526.5
AETAm_vs_WT	Tmem151b	-0.138387	0.0135449	0.131951	7424	6149.5
AETAm_vs_WT	Capzb	-0.064806	0.0135673	0.13198	7959.25	6895.5
AETAm_vs_WT	Tsnaxip1	0.909037	0.0135757	0.13198	22	37
AETAm_vs_WT	Slc39a12	0.147222	0.013571	0.13198	1740.25	1750.5
AETAm_vs_WT	4932438A13Rik	0.12169	0.0136046	0.132181	4923	4825.5
AETAm_vs_WT	Fcrls	-0.206197	0.0136989	0.132917	822.25	648.25
AETAm_vs_WT	Hsph1	-0.100141	0.0137055	0.132917	14175	12047.5
AETAm_vs_WT	mars-01	-0.103268	0.0137021	0.132917	2215.5	1872.75
AETAm_vs_WT	Angptl4	0.542351	0.013742	0.133191	59.25	79.25
AETAm_vs_WT	Cebpb	-0.22101	0.0137678	0.13336	594.5	459.75
AETAm_vs_WT	Crhbp	-0.147122	0.0137765	0.133362	1195.25	976.75
AETAm_vs_WT	Mrpl10	-0.121616	0.0137974	0.133484	1890.5	1571.75
AETAm_vs_WT	Actr1b	-0.0601986	0.0138473	0.133809	10954.8	9506.75
AETAm_vs_WT	Tob2	0.217105	0.0138478	0.133809	1445	1527.75
AETAm_vs_WT	Cabcoco1	0.579361	0.0138842	0.134079	65.75	86.75
AETAm_vs_WT	Icam1	0.619638	0.0139337	0.134476	85.25	118
AETAm_vs_WT	Srxn1	-0.0938227	0.0139594	0.134643	2800.5	2377
AETAm_vs_WT	Arhgef40	0.127232	0.0140102	0.135051	1044.5	1030.75
AETAm_vs_WT	Ckmt1	-0.129292	0.0140488	0.13534	6688.25	5551.25
AETAm_vs_WT	Hif1a	0.0999716	0.0140676	0.135358	3238	3141.5
AETAm_vs_WT	Myh9	0.129195	0.0140653	0.135358	6833.75	6766.5
AETAm_vs_WT	Mtss2	-0.103513	0.0140897	0.135489	11198.5	9515.25
AETAm_vs_WT	Rbm28	-0.144085	0.0141528	0.135768	2626.25	2178
AETAm_vs_WT	Wdr13	-0.0698034	0.0141481	0.135768	10130	8725
AETAm_vs_WT	Igsf9b	0.188451	0.0141431	0.135768	2457	2556.5
AETAm_vs_WT	Ccdc134	0.163867	0.0141388	0.135768	556	564.5
AETAm_vs_WT	Atl3	0.127838	0.0142037	0.136174	2239.25	2204.25
AETAm_vs_WT	Sst	-0.0998472	0.0142793	0.136594	6730.75	5678.25
AETAm_vs_WT	Lamc1	0.172488	0.0142858	0.136594	1814.25	1839
AETAm_vs_WT	Oca2	1.87271	0.0142681	0.136594	52	179.25
AETAm_vs_WT	Zic2	0.622099	0.0142584	0.136594	467	645.75
AETAm_vs_WT	Xist	0.137503	0.0142903	0.136594	31365	31200.5
AETAm_vs_WT	Amer1	0.276024	0.0143082	0.136682	412	452.5
AETAm_vs_WT	Slc26a10	-0.215601	0.0143179	0.136694	704.75	546.75
AETAm_vs_WT	Pomp	-0.0955133	0.0143336	0.136761	2438	2064
AETAm_vs_WT	Vmn2r84	-0.48006	0.0143466	0.136804	83.5	54
AETAm_vs_WT	Chst9	-0.353496	0.0143661	0.136908	151.25	107.5
AETAm_vs_WT	Ggt7	-0.0861141	0.0143963	0.137113	4726.75	4020.75
AETAm_vs_WT	Entr1	-0.0861493	0.0144403	0.137287	3984	3406.25
AETAm_vs_WT	Ephb6	-0.103952	0.0144339	0.137287	3370.75	2836.5
AETAm_vs_WT	Lmo1	-0.144523	0.0144327	0.137287	974.75	798
AETAm_vs_WT	Adgrg1	-0.118383	0.0144589	0.137287	3084	2574
AETAm_vs_WT	Kcnk10	-0.188666	0.0144748	0.137287	627.75	501
AETAm_vs_WT	Epg5	0.164497	0.0144613	0.137287	2278.25	2299.25
AETAm_vs_WT	Qk	0.124583	0.0144734	0.137287	13966.5	13805.8
AETAm_vs_WT	Epn3	1.25223	0.0144912	0.137303	216.75	477.5
AETAm_vs_WT	Anapc1	0.132675	0.014511	0.137303	4032.5	3985.5
AETAm_vs_WT	Armc3	0.684217	0.0145089	0.137303	50.75	72.75
AETAm_vs_WT	Rps2	-0.0687968	0.0145078	0.137303	10719.2	9244.5
AETAm_vs_WT	Agpat1	-0.0912624	0.0145293	0.137394	5121.25	4358.75
AETAm_vs_WT	Usp31	0.090179	0.0145481	0.137491	5427.75	5236.75
AETAm_vs_WT	Tspan18	-0.176012	0.0145593	0.137515	1599.25	1271.5
AETAm_vs_WT	Lman2l	-0.112402	0.0145791	0.137591	2813.75	2363.25
AETAm_vs_WT	Mettl17	-0.137744	0.0145855	0.137591	1277.25	1054
AETAm_vs_WT	Samd5	0.164383	0.0145933	0.137591	1090.5	1103.5
AETAm_vs_WT	Ndor1.2	0.695743	0.0147019	0.138533	42	59.75
AETAm_vs_WT	Mbnl1	0.0925876	0.0147938	0.139235	3869	3747.75
AETAm_vs_WT	Slc18b1	-0.158414	0.0147903	0.139235	996.5	810.75
AETAm_vs_WT	Mapre2	-0.0663442	0.0148384	0.139572	12213	10591
AETAm_vs_WT	Rnpc3	0.168469	0.0148542	0.139638	1362.75	1382.5
AETAm_vs_WT	Wdr6	0.175865	0.0148834	0.139791	7395.75	7510.25
AETAm_vs_WT	Atxn7l3b	-0.0673827	0.014896	0.139791	8770.75	7589.5
AETAm_vs_WT	Plac9	0.456892	0.0148968	0.139791	112.75	143.25
AETAm_vs_WT	Tent5c	0.848355	0.0149131	0.139862	184.75	304.75
AETAm_vs_WT	Gm15728	-0.331745	0.0149361	0.139995	172.5	125
AETAm_vs_WT	Ppp1r36	0.665332	0.0149573	0.140112	51	70.75
AETAm_vs_WT	Mas1	-0.163629	0.0149938	0.140371	1736.75	1400
AETAm_vs_WT	Macf1	0.111468	0.0150186	0.140521	14939	14576
AETAm_vs_WT	Mgat4a	0.134383	0.0150417	0.140654	2087.5	2065.75
AETAm_vs_WT	Osmr	0.28558	0.0150872	0.140874	297.75	329.75
AETAm_vs_WT	Adamts5	0.511368	0.0151006	0.140874	63.5	82
AETAm_vs_WT	Ormdl2	0.430808	0.0150991	0.140874	188	232.25
AETAm_vs_WT	Zfyve26	0.165365	0.0150842	0.140874	1225.75	1240.5
AETAm_vs_WT	Nefm	-0.0944241	0.0151112	0.14089	8036.75	6846
AETAm_vs_WT	Stard9	0.160978	0.0151488	0.141158	779.25	786
AETAm_vs_WT	Capn3	-0.205345	0.0152223	0.141678	482.25	380.5
AETAm_vs_WT	Gm2762	-0.235716	0.015222	0.141678	323.25	249.25
AETAm_vs_WT	Atp6v1f	-0.102623	0.015373	0.142835	2494.25	2108.75
AETAm_vs_WT	Crim1	0.105055	0.0153765	0.142835	6010.25	5870
AETAm_vs_WT	Mavs	0.25203	0.0153825	0.142835	361.25	390
AETAm_vs_WT	ENSMUSG00000121184	0.461129	0.0153781	0.142835	365.5	447.5
AETAm_vs_WT	Cfh	0.604529	0.0154304	0.143196	1043.75	1471
AETAm_vs_WT	Mtus1	0.124234	0.0154509	0.143303	1616.5	1597.5
AETAm_vs_WT	Chd1	0.127897	0.0154979	0.143655	1436	1417
AETAm_vs_WT	Tomm40l	-0.129503	0.0155333	0.1439	2048.25	1707.25
AETAm_vs_WT	Abcc1	0.133407	0.0155778	0.14417	1113.5	1105.5
AETAm_vs_WT	Ctxn1	-0.100105	0.0155825	0.14417	11174.5	9424.75
AETAm_vs_WT	Akap17b	0.170639	0.0155896	0.14417	1037.75	1055.25
AETAm_vs_WT	Parvg	-0.198278	0.0156144	0.144316	521.75	413.25
AETAm_vs_WT	Fam136a	-0.156876	0.0156441	0.144456	876.75	711.5
AETAm_vs_WT	Gmnc	0.423088	0.0156478	0.144456	233.5	289
AETAm_vs_WT	Micos10	-0.104951	0.0157349	0.145177	2000.5	1682.5
AETAm_vs_WT	Ncoa6	0.105491	0.0157536	0.145265	4030.25	3918.25
AETAm_vs_WT	Serpinb8	0.307896	0.01581	0.145701	148.75	167.75
AETAm_vs_WT	Gm10817	-0.668311	0.0158778	0.146241	51.5	29.5
AETAm_vs_WT	C1qb	-0.176375	0.0158986	0.146348	1315.25	1056.75
AETAm_vs_WT	Cct6a	-0.0750328	0.015916	0.146423	6480	5576.75
AETAm_vs_WT	Krit1	0.125021	0.0159479	0.146571	2558.25	2533.75
AETAm_vs_WT	Ahnak	0.43943	0.0159505	0.146571	1430.75	1738.75
AETAm_vs_WT	Mob3b	0.297002	0.0159815	0.146771	291.75	322.25
AETAm_vs_WT	Prrt2	-0.072676	0.0160196	0.147037	12170.8	10474.8
AETAm_vs_WT	Cers4	0.0909824	0.0160483	0.147215	3625.75	3501
AETAm_vs_WT	Arid4a	0.121442	0.016069	0.147321	2007.25	1971
AETAm_vs_WT	Tm4sf1	0.295335	0.0161523	0.147999	409.25	446.5
AETAm_vs_WT	Gdpd1	-0.104427	0.0161627	0.148009	1943.75	1631
AETAm_vs_WT	Hnrnpa0	-0.0875656	0.0161869	0.148065	5958.75	5072.25
AETAm_vs_WT	Sult4a1	-0.0666776	0.0161873	0.148065	14066.8	12132
AETAm_vs_WT	Ikbip	0.197177	0.016253	0.14858	399.25	416.25
AETAm_vs_WT	Casp7	-0.429189	0.0162874	0.148809	92.5	62
AETAm_vs_WT	Myl12a	0.216422	0.0163341	0.149151	579	608.5
AETAm_vs_WT	Eif2ak2	0.349806	0.0164493	0.150117	285.75	325.75
AETAm_vs_WT	Fap	1.53015	0.0164899	0.150314	52.75	143.5
AETAm_vs_WT	Cfap52	0.749689	0.0164828	0.150314	96.5	146
AETAm_vs_WT	Trpv4	1.77496	0.0165003	0.150324	225.25	732.75
AETAm_vs_WT	Akr1b3	-0.112905	0.0165118	0.150342	1260.25	1055.5
AETAm_vs_WT	ENSMUSG00000107877	0.147806	0.0165282	0.150405	1835.75	1834.25
AETAm_vs_WT	Ecd	-0.113271	0.0165726	0.150638	1574.25	1315.75
AETAm_vs_WT	Arhgap29	0.205762	0.016564	0.150638	834.5	877.75
AETAm_vs_WT	Pdzd8	0.0920607	0.0165979	0.150781	2981.75	2875.25
AETAm_vs_WT	Slc22a17	0.113554	0.0166334	0.151018	26981	26439.5
AETAm_vs_WT	Bcan	-0.0566537	0.0166703	0.151267	10776.8	9387.75
AETAm_vs_WT	Ntsr2	-0.0803585	0.016699	0.151441	4810.75	4124.5
AETAm_vs_WT	Nedd9	0.173531	0.0167243	0.151498	585.25	599
AETAm_vs_WT	Phospho1	-0.160501	0.0167219	0.151498	1136	921.25
AETAm_vs_WT	Ap3b2	-0.0819147	0.0167714	0.151839	7607	6524.75
AETAm_vs_WT	Ak5	-0.100254	0.0167848	0.151873	12491.2	10508.2
AETAm_vs_WT	9930111J21Rik2	0.372218	0.0168379	0.152128	160.25	186
AETAm_vs_WT	4930581F22Rik	0.243736	0.0168248	0.152128	236.25	252.5
AETAm_vs_WT	Gm43029	0.699199	0.0168416	0.152128	32.5	46.25
AETAm_vs_WT	4931406C07Rik	0.140635	0.0168554	0.152167	843.5	838.5
AETAm_vs_WT	Dbnl	-0.094753	0.0168973	0.152459	3039.25	2583.75
AETAm_vs_WT	Cxcl14	-0.108862	0.01691	0.152487	3169.5	2676.75
AETAm_vs_WT	Laptm5	-0.131104	0.0169635	0.152722	1619.5	1339.75
AETAm_vs_WT	Dennd4a	0.137649	0.0169496	0.152722	2925.5	2911.75
AETAm_vs_WT	Fryl	0.14606	0.0169648	0.152722	3834.25	3822.25
AETAm_vs_WT	Wasf1	-0.0753045	0.0170404	0.152821	17279.2	14828.5
AETAm_vs_WT	Septin3	-0.0708228	0.0170113	0.152821	26969.5	23250.8
AETAm_vs_WT	Cracdl	-0.086798	0.017019	0.152821	17388.2	14765.5
AETAm_vs_WT	Rpl28	-0.099058	0.0170036	0.152821	4712.25	3981.75
AETAm_vs_WT	Dnaja2	-0.0626968	0.0170479	0.152821	7640.75	6616.5
AETAm_vs_WT	Plcl1	0.116449	0.0170526	0.152821	2011.25	1971
AETAm_vs_WT	Kdr	0.174568	0.0169894	0.152821	877.25	897.75
AETAm_vs_WT	Ptgr2	0.130719	0.0170274	0.152821	1705.25	1686.75
AETAm_vs_WT	Dock6	0.228412	0.0170674	0.152825	1340.75	1432
AETAm_vs_WT	Akna	0.27798	0.0170749	0.152825	254.25	279.75
AETAm_vs_WT	Sprn	-0.100971	0.0170818	0.152825	9264.5	7793.5
AETAm_vs_WT	Rc3h2	0.110414	0.0171284	0.153156	3812.75	3714.5
AETAm_vs_WT	Dop1a	0.120137	0.0171407	0.153179	2447.75	2408
AETAm_vs_WT	Foxd1	0.671519	0.0171502	0.153179	55.5	80.75
AETAm_vs_WT	Prpf19	-0.0678615	0.017204	0.153574	6760.25	5837.5
AETAm_vs_WT	Lrba	0.174781	0.0172143	0.153579	1604.75	1632
AETAm_vs_WT	Zfp36l1	0.193943	0.0172633	0.153672	1625	1683
AETAm_vs_WT	G3bp2	-0.0596893	0.0172572	0.153672	15005.8	13056.8
AETAm_vs_WT	Cog2	0.139288	0.0172573	0.153672	1120.75	1113.75
AETAm_vs_WT	2210408I21Rik	0.250307	0.0172475	0.153672	361.75	385.75
AETAm_vs_WT	Gng4	0.187824	0.0172786	0.153723	1129.5	1173
AETAm_vs_WT	Tor3a	0.327867	0.0173122	0.153936	303	347
AETAm_vs_WT	Pik3ca	0.0987336	0.0173784	0.154352	2861.25	2777.25
AETAm_vs_WT	Fat3	0.158974	0.0173757	0.154352	2331.5	2349
AETAm_vs_WT	Eif3c	-0.0547102	0.0174074	0.154524	8016.75	6985.5
AETAm_vs_WT	Shroom3	0.36278	0.017488	0.155153	276.75	319.75
AETAm_vs_WT	Uaca	0.333662	0.0175704	0.155623	395.5	454.75
AETAm_vs_WT	Ccdc157	0.171433	0.0175695	0.155623	1238	1263.5
AETAm_vs_WT	Gm10501	-0.240708	0.0175635	0.155623	363.75	279
AETAm_vs_WT	Trim28	-0.0757804	0.0176432	0.15573	5393	4620.5
AETAm_vs_WT	Adgrl1	-0.0616786	0.0176606	0.15573	29008.5	25203
AETAm_vs_WT	Chga	-0.0861242	0.0176262	0.15573	4657	3980
AETAm_vs_WT	Mkln1	0.0774908	0.0175981	0.15573	4854	4631.25
AETAm_vs_WT	Acaa1a	-0.107555	0.0176484	0.15573	2958.75	2501.25
AETAm_vs_WT	Ubqln2	-0.0595442	0.0176108	0.15573	11979.5	10418.2
AETAm_vs_WT	Pantr1	-0.126603	0.0176189	0.15573	1413.5	1175.75
AETAm_vs_WT	Kif5a	-0.0749925	0.0176543	0.15573	102595	88276.2
AETAm_vs_WT	Fbxl15	-0.189214	0.0177018	0.155954	527.5	419.75
AETAm_vs_WT	Rps24	-0.0731052	0.0177252	0.155954	7856	6766
AETAm_vs_WT	Scd1	0.111856	0.0177092	0.155954	7888.25	7681.75
AETAm_vs_WT	Gm19554	-0.65352	0.0177173	0.155954	45.75	26.5
AETAm_vs_WT	Nes	0.258816	0.0177623	0.156194	670.25	733.25
AETAm_vs_WT	Pip5k1c	-0.0673739	0.0177839	0.156252	18075.2	15628
AETAm_vs_WT	Lrrc3	-0.250001	0.0177884	0.156252	278.5	212.5
AETAm_vs_WT	Ppm1f	0.0810274	0.0178092	0.156348	4186.5	3997.25
AETAm_vs_WT	Pcdha2	-0.333348	0.0178605	0.156713	252.25	178.75
AETAm_vs_WT	Adam15	-0.0949885	0.0178759	0.156761	4919.25	4172.25
AETAm_vs_WT	Cldn1	1.32786	0.0178914	0.15681	170.5	405.5
AETAm_vs_WT	Rps6ka2	0.10229	0.0179252	0.15702	2869.75	2787
AETAm_vs_WT	Vxn	-0.0752101	0.0179451	0.157109	10544.8	9100.25
AETAm_vs_WT	Lonrf3	0.239799	0.0180022	0.157409	379.5	404
AETAm_vs_WT	Zfp442	0.459214	0.0179893	0.157409	99.75	124
AETAm_vs_WT	Gm2061	-0.353487	0.018009	0.157409	166	118.75
AETAm_vs_WT	Cfap74	0.227624	0.0180215	0.157431	667.75	712.25
AETAm_vs_WT	Trp53bp2	0.10815	0.0180329	0.157444	1629	1591
AETAm_vs_WT	Angptl2	1.34803	0.0180697	0.157679	172.25	413.25
AETAm_vs_WT	Dync1h1	0.0912783	0.0181278	0.158066	26288.8	25313.2
AETAm_vs_WT	Iqsec3	-0.0545135	0.0181374	0.158066	12331.8	10757
AETAm_vs_WT	Gm13341	-0.556322	0.0181438	0.158066	71.75	44
AETAm_vs_WT	Ttll11	-0.114955	0.0182123	0.158577	1529.75	1280.25
AETAm_vs_WT	Ust	-0.103516	0.018245	0.158688	3260.75	2749.75
AETAm_vs_WT	Kcna3	0.436886	0.0182351	0.158688	175.25	216
AETAm_vs_WT	Faxc	0.24621	0.0182717	0.158825	1636.75	1750.25
AETAm_vs_WT	Atpif1	-0.0922518	0.0182807	0.158825	3332.5	2831.25
AETAm_vs_WT	Prkar1a	-0.0634457	0.0182945	0.158858	31153.2	27078.2
AETAm_vs_WT	Adcy3	-0.0952529	0.0183362	0.158998	3066	2601.25
AETAm_vs_WT	Bin1	-0.0608579	0.0183804	0.158998	12358.5	10707.5
AETAm_vs_WT	Alkbh8	0.123688	0.0183767	0.158998	1892.75	1865
AETAm_vs_WT	Rnf220	-0.069991	0.0183337	0.158998	6003.5	5182.25
AETAm_vs_WT	Tax1bp3	0.299732	0.0183721	0.158998	249.5	277.75
AETAm_vs_WT	Lsm8	-0.15493	0.0183634	0.158998	867.5	707
AETAm_vs_WT	Hspe1	-0.106549	0.0183665	0.158998	1787.25	1505.5
AETAm_vs_WT	Cic	-0.0666058	0.0184075	0.159146	10734.2	9299.75
AETAm_vs_WT	Hectd1	0.106804	0.0184206	0.159173	6822	6625
AETAm_vs_WT	Hsbp1	-0.0899234	0.0184327	0.15919	6153.5	5219.25
AETAm_vs_WT	Gba2	-0.0791555	0.018452	0.159271	3704.75	3180
AETAm_vs_WT	Eps8l2	0.723989	0.0185145	0.159638	287.75	438.25
AETAm_vs_WT	Stxbp6	-0.0980046	0.0185089	0.159638	5334	4502.75
AETAm_vs_WT	Pde7b	-0.138773	0.0185327	0.159708	881.25	724.5
AETAm_vs_WT	Lmna	0.152371	0.018573	0.159969	1277	1276
AETAm_vs_WT	Sec24a	0.158749	0.0185885	0.159998	1115.25	1127
AETAm_vs_WT	Efcab1	0.236265	0.0185964	0.159998	452	481.75
AETAm_vs_WT	Actb	-0.0707985	0.0186397	0.160026	50510.2	43537
AETAm_vs_WT	Rtn2	-0.116774	0.01864	0.160026	2527	2108
AETAm_vs_WT	Chrm1	-0.071729	0.0186191	0.160026	11230.8	9662.5
AETAm_vs_WT	Pfkm	-0.0687967	0.0186387	0.160026	14633.8	12631.5
AETAm_vs_WT	Dnajb5	-0.085387	0.0186608	0.160119	7942.75	6797.75
AETAm_vs_WT	Epb41l1	-0.0716861	0.0187012	0.160379	26298	22698.8
AETAm_vs_WT	Slc29a3	-0.139998	0.0187486	0.160431	864.5	709.25
AETAm_vs_WT	Mllt1	-0.0836331	0.018723	0.160431	3564	3049.5
AETAm_vs_WT	Cd93	0.305688	0.0187575	0.160431	397.75	445.5
AETAm_vs_WT	Aldh2	0.174995	0.0187428	0.160431	3702.75	3808.75
AETAm_vs_WT	Kcnk9	0.119779	0.0187491	0.160431	5027.25	4914
AETAm_vs_WT	Noa1	-0.143194	0.0188195	0.160702	743.25	609
AETAm_vs_WT	Zfp704	0.126053	0.0188174	0.160702	3144.75	3091.5
AETAm_vs_WT	Ilrun	-0.085292	0.0188185	0.160702	10917.8	9351.5
AETAm_vs_WT	Htt	0.112984	0.018891	0.16114	7597.5	7422.25
AETAm_vs_WT	Lsm14b	-0.0757908	0.0188857	0.16114	3694.5	3177
AETAm_vs_WT	Bicd1	0.154003	0.0189467	0.161528	2124.75	2148.75
AETAm_vs_WT	Dennd1a	-0.0956392	0.0189637	0.161587	3316.75	2822.25
AETAm_vs_WT	Rps12	-0.0964953	0.0189877	0.161705	4316	3657.25
AETAm_vs_WT	Mapk7	-0.141848	0.0190496	0.161764	1248.5	1021.25
AETAm_vs_WT	Gys1	0.216262	0.0190365	0.161764	885	936.5
AETAm_vs_WT	Ahsa1	-0.100857	0.0190556	0.161764	4359.5	3692.5
AETAm_vs_WT	Lmo4	-0.0737187	0.0190379	0.161764	6036	5187
AETAm_vs_WT	Brinp1	-0.0876337	0.0190531	0.161764	9587.25	8139.5
AETAm_vs_WT	Aamdc	-0.151328	0.0190241	0.161764	707	575.25
AETAm_vs_WT	Gns	0.0862911	0.0190857	0.161805	4559.75	4387
AETAm_vs_WT	Brsk1	-0.0861469	0.019101	0.161805	13758.5	11742.8
AETAm_vs_WT	Nfe2l1	0.0595264	0.0190913	0.161805	13804	13046.5
AETAm_vs_WT	Atad2b	0.146204	0.0190771	0.161805	1184.75	1180.5
AETAm_vs_WT	Mrc2	0.485476	0.0191456	0.161838	301.25	388.25
AETAm_vs_WT	Lrrc9	0.521811	0.0191192	0.161838	65.75	84.5
AETAm_vs_WT	Scaf11	0.127435	0.0191384	0.161838	3285.25	3229.25
AETAm_vs_WT	Bin2	-0.257834	0.0191418	0.161838	237.25	180.5
AETAm_vs_WT	Ctnnd1	0.0846742	0.0192068	0.162198	2894.5	2780.5
AETAm_vs_WT	Galm	0.437897	0.0192085	0.162198	145	178.75
AETAm_vs_WT	Cttnbp2nl	0.120289	0.0192644	0.162584	1403	1381.75
AETAm_vs_WT	Ptprk	0.104762	0.0192849	0.162671	2577.5	2515.5
AETAm_vs_WT	Abl2	0.141139	0.0193344	0.163003	4222.5	4187.25
AETAm_vs_WT	Gm15542	0.519211	0.0193492	0.163041	112.25	141.5
AETAm_vs_WT	U2af2	-0.065281	0.0193922	0.163317	6393.25	5541.5
AETAm_vs_WT	Golga7b	-0.101084	0.0194255	0.163511	2892.75	2450.25
AETAm_vs_WT	Atxn7l2	-0.125317	0.0194509	0.163638	1325.25	1099.25
AETAm_vs_WT	Ace	1.48875	0.0194903	0.163883	1534.75	4078.25
AETAm_vs_WT	Xpo1	-0.0993583	0.0195809	0.164558	4641.25	3944.5
AETAm_vs_WT	Cfap97d2	0.502942	0.0195952	0.164592	48.5	62
AETAm_vs_WT	Igfbpl1	1.25352	0.0196118	0.164644	27.75	57.75
AETAm_vs_WT	Id1	0.319191	0.0196221	0.164644	296.75	336.25
AETAm_vs_WT	Stxbp5l	0.480117	0.0196436	0.164651	1246	1562.25
AETAm_vs_WT	Pdpn	0.263486	0.0196422	0.164651	475	517.25
AETAm_vs_WT	Limd2	-0.120648	0.0196627	0.164724	3086.5	2560.5
AETAm_vs_WT	Nectin1	-0.117146	0.0196871	0.164842	3403.5	2837.25
AETAm_vs_WT	Slc25a36	0.104457	0.0197505	0.165199	3171.5	3087
AETAm_vs_WT	Gm14964	0.413706	0.0197423	0.165199	86.75	104
AETAm_vs_WT	Sptssa	0.151023	0.0197891	0.165435	767	772
AETAm_vs_WT	Rhpn2	0.268466	0.0199569	0.166699	306.25	332.75
AETAm_vs_WT	Scg2	-0.0861577	0.0199612	0.166699	8601.25	7337.5
AETAm_vs_WT	Gdap1l1	-0.110456	0.0200282	0.167171	2601.25	2185
AETAm_vs_WT	Ddah1	-0.0920155	0.0200665	0.167403	3432.5	2925.5
AETAm_vs_WT	Prkaca	-0.0601296	0.0200804	0.167432	8653.75	7516.75
AETAm_vs_WT	Recql5	-0.116846	0.0201352	0.167793	1361.5	1135.75
AETAm_vs_WT	Trappc14	-0.0922637	0.0201448	0.167793	2845.5	2415.5
AETAm_vs_WT	Ddx39b	-0.0632886	0.0201692	0.167908	7117.5	6165.5
AETAm_vs_WT	Tcf25	-0.0551193	0.0201903	0.167908	23350.8	20348.8
AETAm_vs_WT	Sbf1	-0.0520039	0.0201823	0.167908	12661.2	11039.5
AETAm_vs_WT	Slmap	0.0772463	0.0202124	0.167917	4720.75	4512.25
AETAm_vs_WT	Cdkl5	0.156649	0.0202047	0.167917	6234.25	6263
AETAm_vs_WT	Steep1	-0.108908	0.0202237	0.167923	2254.5	1903.25
AETAm_vs_WT	Glb1l	0.273531	0.0202716	0.168233	378.75	415.25
AETAm_vs_WT	Cacna1i	-0.0967532	0.0203686	0.16895	5065.25	4302
AETAm_vs_WT	Chia1	0.457641	0.0203827	0.168979	76.5	93.5
AETAm_vs_WT	Il10rb	0.206581	0.0204165	0.169171	369.5	385.5
AETAm_vs_WT	Lrrc1	0.207053	0.0204277	0.169176	371.25	389.25
AETAm_vs_WT	Abhd4	-0.0953941	0.0204582	0.169341	2348	1996.25
AETAm_vs_WT	Angel1	-0.191318	0.020472	0.169367	422.75	334.5
AETAm_vs_WT	Adcy2	-0.0720682	0.0204971	0.169399	6178.75	5318.25
AETAm_vs_WT	Pcm1	0.149259	0.0204932	0.169399	3754	3768.75
AETAm_vs_WT	Pdlim7	-0.101559	0.0205584	0.169817	2331.5	1969.5
AETAm_vs_WT	Ap1m1	-0.0935746	0.020688	0.170386	2610.25	2219.5
AETAm_vs_WT	Hint1	-0.0731202	0.02066	0.170386	3979.25	3420.5
AETAm_vs_WT	Grk2	-0.0628402	0.0206839	0.170386	8894	7718.5
AETAm_vs_WT	Tet3	0.133738	0.0206853	0.170386	2998.5	2987.5
AETAm_vs_WT	Ythdf2	0.109241	0.0206796	0.170386	1680.25	1637
AETAm_vs_WT	2810013P06Rik	-0.161538	0.0206914	0.170386	788	638
AETAm_vs_WT	Tfeb	0.238288	0.0207131	0.170477	308.25	327.5
AETAm_vs_WT	Rbpms2	0.393498	0.0207476	0.170514	134.75	161
AETAm_vs_WT	Bace2	-0.630919	0.0207351	0.170514	216	125.75
AETAm_vs_WT	Rhod	0.769776	0.0207497	0.170514	32.5	49.25
AETAm_vs_WT	Tmem86a	0.224928	0.0207837	0.17064	386.5	411.5
AETAm_vs_WT	Bco2	-0.362145	0.0207865	0.17064	129	91.75
AETAm_vs_WT	Prr14l	0.116862	0.0208198	0.170825	3460.75	3383.25
AETAm_vs_WT	Khdc4	0.0904743	0.0208398	0.170869	2621.25	2523.75
AETAm_vs_WT	Gm11808	-0.452642	0.0208466	0.170869	81.25	53.5
AETAm_vs_WT	Npdc1	-0.0809917	0.0208749	0.171013	8997	7702
AETAm_vs_WT	Gm28438	-0.0785718	0.020892	0.171065	28679.5	24636.2
AETAm_vs_WT	Spopl	0.164318	0.0209059	0.171091	872.25	886.75
AETAm_vs_WT	Fcgrt	0.239064	0.0209269	0.171175	545	588
AETAm_vs_WT	Tmem14c	-0.132949	0.0209622	0.171376	946.5	782
AETAm_vs_WT	Utp20	0.154375	0.0209804	0.171437	1236	1243
AETAm_vs_WT	Schip1	-0.0863293	0.0210052	0.171552	7406	6321.5
AETAm_vs_WT	Mir124a-1hg	-0.0854941	0.0210468	0.171803	11698.5	10004.5
AETAm_vs_WT	Dyrk1b	0.170707	0.0210748	0.171943	889	903.25
AETAm_vs_WT	Cisd1	-0.0908328	0.02116	0.172462	2169	1843.25
AETAm_vs_WT	Ppp4r1l-ps	0.163205	0.0211585	0.172462	871.25	881.5
AETAm_vs_WT	Niban1	0.315776	0.021182	0.172553	158.75	179
AETAm_vs_WT	Crlf1	-0.138189	0.0212005	0.172607	964	793
AETAm_vs_WT	C1qtnf12	0.29313	0.0212211	0.172607	302.25	334
AETAm_vs_WT	Fam171a2	-0.131991	0.0212119	0.172607	3905.75	3229.25
AETAm_vs_WT	A930017K11Rik	0.543375	0.0212418	0.172687	40.75	54
AETAm_vs_WT	Scai	0.173905	0.0213152	0.173107	3000.75	3072.5
AETAm_vs_WT	Slc29a4	0.332542	0.0213076	0.173107	1771	2036.25
AETAm_vs_WT	Tc2n	1.69873	0.0213662	0.173433	39	117.25
AETAm_vs_WT	Dus3l	-0.08644	0.0214545	0.173624	2997.25	2553.25
AETAm_vs_WT	Bmp7	0.767352	0.0214551	0.173624	309.5	497.75
AETAm_vs_WT	Reep3	0.101425	0.0214547	0.173624	1996	1938
AETAm_vs_WT	Tesc	-0.160426	0.0214238	0.173624	1484.25	1197
AETAm_vs_WT	Cdk13	0.0787688	0.0214427	0.173624	3094.25	2952.5
AETAm_vs_WT	Kctd4	-0.126922	0.021414	0.173624	3888	3226.5
AETAm_vs_WT	Rpl13	-0.0802873	0.0214765	0.173709	8271.75	7096.25
AETAm_vs_WT	Tmem129	0.142417	0.0216018	0.174456	868.75	865.25
AETAm_vs_WT	Cpne4	-0.112727	0.0215923	0.174456	5008.5	4183.5
AETAm_vs_WT	Cpsf1	-0.0829881	0.0215883	0.174456	3158	2704.25
AETAm_vs_WT	Atxn2l	-0.0831536	0.0216177	0.174497	10868.2	9331.5
AETAm_vs_WT	Eef2	-0.05688	0.0216475	0.174649	41516.2	36157.2
AETAm_vs_WT	Slc12a5	-0.058001	0.0216986	0.174926	27593	24051.5
AETAm_vs_WT	Top3b	0.121762	0.0217068	0.174926	1782.5	1753.25
AETAm_vs_WT	Ammecr1l	0.115665	0.0217148	0.174926	1285	1261
AETAm_vs_WT	Fbxl6	-0.134853	0.0217536	0.17515	974.25	804.75
AETAm_vs_WT	Ttbk1	-0.0704331	0.0217868	0.17524	9682.5	8384.5
AETAm_vs_WT	Ptprn	-0.0658049	0.0217788	0.17524	24324.8	21008.2
AETAm_vs_WT	ENSMUSG00000121115	-0.411207	0.0218187	0.175408	102.25	69.75
AETAm_vs_WT	E130308A19Rik	0.182811	0.0218418	0.175506	479	493.25
AETAm_vs_WT	Eif3g	-0.102705	0.0218788	0.175714	2030.75	1715.5
AETAm_vs_WT	Ptpn18	0.509693	0.021896	0.175747	44.75	57.75
AETAm_vs_WT	Serhl	0.390605	0.0219159	0.175747	203.5	241.5
AETAm_vs_WT	Gm16638	-0.162955	0.0219155	0.175747	798.75	646
AETAm_vs_WT	Ube2m	-0.0929267	0.0219551	0.175933	4358.5	3688
AETAm_vs_WT	Kdm2a	0.0853916	0.0219693	0.175933	4796.5	4584.75
AETAm_vs_WT	Scn2a	0.142892	0.0219722	0.175933	14191.2	14139.2
AETAm_vs_WT	Ep400	0.126574	0.0219914	0.175986	4422.75	4360
AETAm_vs_WT	Mxd4	0.109524	0.022001	0.175986	3690.25	3591.25
AETAm_vs_WT	P4htm	-0.0963721	0.0220516	0.176158	2829	2388.25
AETAm_vs_WT	Ttpal	-0.0882393	0.0220667	0.176158	2873.5	2455
AETAm_vs_WT	Eea1	0.14161	0.0220593	0.176158	2666.5	2647.5
AETAm_vs_WT	Sox5	0.13127	0.0220351	0.176158	1324.75	1316.5
AETAm_vs_WT	Ncoa2	0.136825	0.0220955	0.176299	5045	5008.75
AETAm_vs_WT	Sfrp1	1.01448	0.0221104	0.17633	244.75	463.75
[truncated: 23,238 more rows]

## Sheet: Table S5
Table S5. List of the 567 genes significantly modulated in hippocampi from adult AETA-m mice. The thresholds used for selection are: Minimal Base Mean > 10, Log2 FC<-0.1 or > 0.2 and adj.Pval <0.05.
Gene Symbol	Entrez Gene Name	Location	Type(s)	Regulation in AETA-m mice	Ensembl_gene_id	Human_gene
Aars2	alanyl-tRNA synthetase 2, mitochondrial	Cytoplasm	enzyme	DOWN	ENSMUSG00000023938	AARS2
Abcg4	ATP binding cassette subfamily G member 4	Plasma Membrane	transporter	DOWN	ENSMUSG00000032131	ABCG4
Acot7	acyl-CoA thioesterase 7	Cytoplasm	enzyme	DOWN	ENSMUSG00000028937	ACOT7
Acsbg1	acyl-CoA synthetase bubblegum family member 1	Cytoplasm	enzyme	DOWN	ENSMUSG00000032281	ACSBG1
Actl6b	actin like 6B	Nucleus	other	DOWN	ENSMUSG00000029712	ACTL6B
Adam11	ADAM metallopeptidase domain 11	Plasma Membrane	peptidase	DOWN	ENSMUSG00000020926	ADAM11
Adam8	ADAM metallopeptidase domain 8	Plasma Membrane	peptidase	DOWN	ENSMUSG00000025473	ADAM8
Adra1d	adrenoceptor alpha 1D	Plasma Membrane	G-protein coupled receptor	DOWN	ENSMUSG00000027335	ADRA1D
Aldoc	aldolase, fructose-bisphosphate C	Cytoplasm	enzyme	DOWN	ENSMUSG00000017390	ALDOC
Aloxe3	arachidonate lipoxygenase 3	Extracellular Space	enzyme	DOWN	ENSMUSG00000020892	ALOXE3
Ankrd46	ankyrin repeat domain 46	Nucleus	transcription regulator	DOWN	ENSMUSG00000048307	ANKRD46
Ap1s1	adaptor related protein complex 1 subunit sigma 1	Cytoplasm	transporter	DOWN	ENSMUSG00000004849	AP1S1
Arhgap33	Rho GTPase activating protein 33	Plasma Membrane	transporter	DOWN	ENSMUSG00000036882	ARHGAP33
Arhgef25	Rho guanine nucleotide exchange factor 25	Cytoplasm	other	DOWN	ENSMUSG00000019467	ARHGEF25
Arhgef4	Rho guanine nucleotide exchange factor 4	Cytoplasm	other	DOWN	ENSMUSG00000037509
Asphd2	aspartate beta-hydroxylase domain containing 2	Other	enzyme	DOWN	ENSMUSG00000029348	ASPHD2
Atf6b	activating transcription factor 6 beta	Nucleus	transcription regulator	DOWN	ENSMUSG00000015461	ATF6B
Atp6v0e2	ATPase H+ transporting V0 subunit e2	Cytoplasm	enzyme	DOWN	ENSMUSG00000039347	ATP6V0E2
B4galnt1	beta-1,4-N-acetyl-galactosaminyltransferase 1	Cytoplasm	enzyme	DOWN	ENSMUSG00000006731	B4GALNT1
Baalc	BAALC binder of MAP3K1 and KLF4	Cytoplasm	other	DOWN	ENSMUSG00000022296	BAALC
Basp1	brain abundant membrane attached signal protein 1	Nucleus	transcription regulator	DOWN	ENSMUSG00000045763	BASP1
Bex2	_	_	_	DOWN	ENSMUSG00000042750	BEX1
Bex2	_	_	_	DOWN	ENSMUSG00000042750	BEX2
Bok	BCL2 family apoptosis regulator BOK	Cytoplasm	other	DOWN	ENSMUSG00000026278	BOK
Btbd3	BTB domain containing 3	Other	other	DOWN	ENSMUSG00000062098	BTBD3
C1qa	complement C1q A chain	Extracellular Space	other	DOWN	ENSMUSG00000036887	C1QA
C1ql2	complement C1q like 2	Extracellular Space	other	DOWN	ENSMUSG00000036907	C1QL2
Cabp7	calcium binding protein 7	Cytoplasm	other	DOWN	ENSMUSG00000009075	CABP7
Cacnb3	calcium voltage-gated channel auxiliary subunit beta 3	Plasma Membrane	ion channel	DOWN	ENSMUSG00000003352	CACNB3
Caly	calcyon neuron specific vesicular protein	Plasma Membrane	transmembrane receptor	DOWN	ENSMUSG00000025468	CALY
Camk2a	calcium/calmodulin dependent protein kinase II alpha	Cytoplasm	kinase	DOWN	ENSMUSG00000024617	CAMK2A
Camkk1	calcium/calmodulin dependent protein kinase kinase 1	Cytoplasm	kinase	DOWN	ENSMUSG00000020785	CAMKK1
Capn11	calpain 11	Cytoplasm	peptidase	DOWN	ENSMUSG00000058626	CAPN11
Cck	cholecystokinin	Extracellular Space	other	DOWN	ENSMUSG00000032532	CCK
Cept1	choline/ethanolamine phosphotransferase 1	Cytoplasm	enzyme	DOWN	ENSMUSG00000040774	CEPT1
Chrd	chordin	Extracellular Space	other	DOWN	ENSMUSG00000006958	CHRD
Cldn10	claudin 10	Plasma Membrane	other	DOWN	ENSMUSG00000022132	CLDN10
Clptm1l	CLPTM1 like	Cytoplasm	transporter	DOWN	ENSMUSG00000021610	CLPTM1L
Clstn2	calsyntenin 2	Plasma Membrane	transporter	DOWN	ENSMUSG00000032452	CLSTN2
Cnih2	cornichon family AMPA receptor auxiliary protein 2	Extracellular Space	other	DOWN	ENSMUSG00000024873	CNIH2
Cnot2	CCR4-NOT transcription complex subunit 2	Nucleus	transcription regulator	DOWN	ENSMUSG00000020166	CNOT2
Cntnap1	contactin associated protein 1	Plasma Membrane	other	DOWN	ENSMUSG00000017167	CNTNAP1
Cops6	COP9 signalosome subunit 6	Nucleus	other	DOWN	ENSMUSG00000019494	COPS6
Coro2b	coronin 2B	Plasma Membrane	other	DOWN	ENSMUSG00000041729	CORO2B
Cox14	cytochrome c oxidase assembly factor COX14	Cytoplasm	other	DOWN	ENSMUSG00000023020	COX14
Cplx1	complexin 1	Plasma Membrane	transporter	DOWN	ENSMUSG00000033615	CPLX1
Cplx2	complexin 2	Cytoplasm	other	DOWN	ENSMUSG00000025867	CPLX2
Cpne6	copine 6	Plasma Membrane	enzyme	DOWN	ENSMUSG00000022212	CPNE6
Crtac1	cartilage acidic protein 1	Extracellular Space	other	DOWN	ENSMUSG00000042401	CRTAC1
Cx3cl1	C-X3-C motif chemokine ligand 1	Extracellular Space	cytokine	DOWN	ENSMUSG00000031778	CX3CL1
Cyp2j9	cytochrome P450, family 2, subfamily j, polypeptide 9	Cytoplasm	enzyme	DOWN	ENSMUSG00000015224	CYP2J2
Dalrd3	DALR anticodon binding domain containing 3	Other	other	DOWN	ENSMUSG00000019039	DALRD3
Dbn1	drebrin 1	Cytoplasm	other	DOWN	ENSMUSG00000034675	DBN1
Ddn	dendrin	Cytoplasm	transcription regulator	DOWN	ENSMUSG00000059213	DDN
Dio3	iodothyronine deiodinase 3	Plasma Membrane	enzyme	DOWN	ENSMUSG00000075707	DIO3
Doc2b	double C2 domain beta	Cytoplasm	transporter	DOWN	ENSMUSG00000020848	DOC2B
Dpf1	double PHD fingers 1	Nucleus	other	DOWN	ENSMUSG00000030584	DPF1
Dpp9	dipeptidyl peptidase 9	Cytoplasm	peptidase	DOWN	ENSMUSG00000001229	DPP9
Dscaml1	DS cell adhesion molecule like 1	Plasma Membrane	other	DOWN	ENSMUSG00000032087	DSCAML1
Eef1a2	eukaryotic translation elongation factor 1 alpha 2	Cytoplasm	translation regulator	DOWN	ENSMUSG00000016349	EEF1A2
Elk1	ETS transcription factor ELK1	Nucleus	transcription regulator	DOWN	ENSMUSG00000009406	ELK1
Emc10	ER membrane protein complex subunit 10	Cytoplasm	other	DOWN	ENSMUSG00000008140	EMC10
Enc1	ectodermal-neural cortex 1	Nucleus	peptidase	DOWN	ENSMUSG00000041773	ENC1
Entpd4	ectonucleoside triphosphate diphosphohydrolase 4	Cytoplasm	enzyme	DOWN	ENSMUSG00000095463	ENTPD4
Epdr1	ependymin related 1	Nucleus	other	DOWN	ENSMUSG00000002808	EPDR1
Exd2	exonuclease 3'-5' domain containing 2	Cytoplasm	enzyme	DOWN	ENSMUSG00000032705	EXD2
Faim2	Fas apoptotic inhibitory molecule 2	Plasma Membrane	other	DOWN	ENSMUSG00000023011	FAIM2
Fam107a	family with sequence similarity 107 member A	Nucleus	other	DOWN	ENSMUSG00000021750	FAM107A
Farp2	FERM, ARH/RhoGEF and pleckstrin domain protein 2	Cytoplasm	other	DOWN	ENSMUSG00000034066	FARP2
Fbll1	fibrillarin-like 1	Nucleus	other	DOWN	ENSMUSG00000051062	FBLL1
Flrt3	fibronectin leucine rich transmembrane protein 3	Plasma Membrane	other	DOWN	ENSMUSG00000051379	FLRT3
Fmnl1	formin-like 1	Cytoplasm	other	DOWN	ENSMUSG00000055805	FMNL1
Foxg1	forkhead box G1	Nucleus	transcription regulator	DOWN	ENSMUSG00000020950	FOXG1
Fscn1	fascin actin-bundling protein 1	Cytoplasm	other	DOWN	ENSMUSG00000029581	FSCN1
Fyn	FYN proto-oncogene, Src family tyrosine kinase	Plasma Membrane	kinase	DOWN	ENSMUSG00000019843	FYN
Gabbr2	gamma-aminobutyric acid type B receptor subunit 2	Plasma Membrane	G-protein coupled receptor	DOWN	ENSMUSG00000039809	GABBR2
Gm21984	_	_	_	DOWN	ENSMUSG00000095334
Gm37607	_	_	_	DOWN	ENSMUSG00000103839
Gm3883	predicted gene 3883	Other	other	DOWN	ENSMUSG00000093909
Gng7	G protein subunit gamma 7	Plasma Membrane	other	DOWN	ENSMUSG00000048240	GNG7
Gpc1	glypican 1	Plasma Membrane	transmembrane receptor	DOWN	ENSMUSG00000034220	GPC1
Gpd1	glycerol-3-phosphate dehydrogenase 1	Cytoplasm	enzyme	DOWN	ENSMUSG00000023019	GPD1
Gpr37l1	G protein-coupled receptor 37 like 1	Plasma Membrane	G-protein coupled receptor	DOWN	ENSMUSG00000026424	GPR37L1
Grik4	glutamate ionotropic receptor kainate type subunit 4	Plasma Membrane	ion channel	DOWN	ENSMUSG00000032017	GRIK4
Gstm1	glutathione S-transferase mu 1	Cytoplasm	enzyme	DOWN	ENSMUSG00000058135	GSTM1
H1f10	_	_	_	DOWN	ENSMUSG00000044927	H1-10
Hcn2	hyperpolarization activated cyclic nucleotide gated potassium and sodium channel 2	Plasma Membrane	ion channel	DOWN	ENSMUSG00000020331	HCN2
Hnrnpc	heterogeneous nuclear ribonucleoprotein C	Nucleus	other	DOWN	ENSMUSG00000060373	HNRNPCL2
Hnrnpc	heterogeneous nuclear ribonucleoprotein C	Nucleus	other	DOWN	ENSMUSG00000060373	HNRNPCL4
Hnrnpc	heterogeneous nuclear ribonucleoprotein C	Nucleus	other	DOWN	ENSMUSG00000060373	HNRNPCL1
Hnrnpc	heterogeneous nuclear ribonucleoprotein C	Nucleus	other	DOWN	ENSMUSG00000060373	HNRNPCL3
Hnrnpdl	heterogeneous nuclear ribonucleoprotein D like	Nucleus	other	DOWN	ENSMUSG00000029328	HNRNPDL
Hpcal4	hippocalcin like 4	Other	transporter	DOWN	ENSMUSG00000046093	HPCAL4
Hrk	harakiri, BCL2 interacting protein (contains only BH3 domain)	Cytoplasm	other	DOWN	ENSMUSG00000046607	HRK
Icam5	intercellular adhesion molecule 5	Plasma Membrane	other	DOWN	ENSMUSG00000032174	ICAM5
Ighm	immunoglobulin heavy constant mu	Plasma Membrane	transmembrane receptor	DOWN	ENSMUSG00000076617	IGHM
Inka2	inka box actin regulator 2	Nucleus	other	DOWN	ENSMUSG00000048458	INKA2
Kcnip2	potassium voltage-gated channel interacting protein 2	Plasma Membrane	transporter	DOWN	ENSMUSG00000025221	KCNIP2
Khdrbs3	KH RNA binding domain containing, signal transduction associated 3	Nucleus	other	DOWN	ENSMUSG00000022332	KHDRBS3
Kirrel3	kirre like nephrin family adhesion molecule 3	Extracellular Space	other	DOWN	ENSMUSG00000032036	KIRREL3
Ky	kyphoscoliosis peptidase	Cytoplasm	other	DOWN	ENSMUSG00000035606	KY
Lcmt2	leucine carboxyl methyltransferase 2	Cytoplasm	enzyme	DOWN	ENSMUSG00000074890	LCMT2
Lenep	lens epithelial protein	Cytoplasm	other	DOWN	ENSMUSG00000078173	LENEP
Lhx2	LIM homeobox 2	Nucleus	transcription regulator	DOWN	ENSMUSG00000000247	LHX2
Lrp11	LDL receptor related protein 11	Other	other	DOWN	ENSMUSG00000019796	LRP11
Lrrc10b	leucine rich repeat containing 10B	Other	other	DOWN	ENSMUSG00000090291	LRRC10B
Ly6e	lymphocyte antigen 6 family member E	Plasma Membrane	other	DOWN	ENSMUSG00000022587	LY6E
Lynx1	Ly6/neurotoxin 1	Plasma Membrane	transporter	DOWN	ENSMUSG00000022594	LYNX1
Map1lc3b	microtubule associated protein 1 light chain 3 beta	Cytoplasm	other	DOWN	ENSMUSG00000031812
Mapk8ip2	mitogen-activated protein kinase 8 interacting protein 2	Cytoplasm	other	DOWN	ENSMUSG00000022619	MAPK8IP2
Mical2	microtubule associated monooxygenase, calponin and LIM domain containing 2	Cytoplasm	enzyme	DOWN	ENSMUSG00000038244	MICAL2
Mmd	monocyte to macrophage differentiation associated	Plasma Membrane	kinase	DOWN	ENSMUSG00000003948	MMD
Mmd2	monocyte to macrophage differentiation associated 2	Cytoplasm	kinase	DOWN	ENSMUSG00000039533	MMD2
Mmp17	matrix metallopeptidase 17	Extracellular Space	peptidase	DOWN	ENSMUSG00000029436	MMP17
Mrfap1	Morf4 family associated protein 1	Nucleus	other	DOWN	ENSMUSG00000055302	MRFAP1
Mrfap1	Morf4 family associated protein 1	Nucleus	other	DOWN	ENSMUSG00000055302	MRFAP1L2
Mrfap1	Morf4 family associated protein 1	Nucleus	other	DOWN	ENSMUSG00000055302	MRFAP1L1
Nat14	N-acetyltransferase 14 (putative)	Extracellular Space	other	DOWN	ENSMUSG00000035285	NAT14
Ncdn	neurochondrin	Cytoplasm	other	DOWN	ENSMUSG00000028833	NCDN
Ncs1	neuronal calcium sensor 1	Plasma Membrane	other	DOWN	ENSMUSG00000062661	NCS1
Ndrg2	NDRG family member 2	Cytoplasm	other	DOWN	ENSMUSG00000004558	NDRG2
Nefl	neurofilament light chain	Cytoplasm	other	DOWN	ENSMUSG00000022055	NEFL
Nme1	NME/NM23 nucleoside diphosphate kinase 1	Cytoplasm	kinase	DOWN	ENSMUSG00000037601	NME1
Nptx1	neuronal pentraxin 1	Extracellular Space	other	DOWN	ENSMUSG00000025582	NPTX1
Nptxr	neuronal pentraxin receptor	Plasma Membrane	transmembrane receptor	DOWN	ENSMUSG00000022421	NPTXR
Nrgn	neurogranin	Plasma Membrane	other	DOWN	ENSMUSG00000053310	NRGN
Nrn1	neuritin 1	Cytoplasm	other	DOWN	ENSMUSG00000039114	NRN1
Nrsn1	neurensin 1	Plasma Membrane	other	DOWN	ENSMUSG00000048978	NRSN1
Nsf	N-ethylmaleimide sensitive factor, vesicle fusing ATPase	Cytoplasm	transporter	DOWN	ENSMUSG00000034187	NSF
Nsmf	NMDA receptor synaptonuclear signaling and neuronal migration factor	Extracellular Space	other	DOWN	ENSMUSG00000006476	NSMF
Olfm1	olfactomedin 1	Cytoplasm	other	DOWN	ENSMUSG00000026833	OLFM1
Olig1	oligodendrocyte transcription factor 1	Nucleus	transcription regulator	DOWN	ENSMUSG00000046160	OLIG1
Olig2	oligodendrocyte transcription factor 2	Nucleus	transcription regulator	DOWN	ENSMUSG00000039830	OLIG2
Pcdh1	protocadherin 1	Plasma Membrane	other	DOWN	ENSMUSG00000051375	PCDH1
Pcdhga4	protocadherin gamma subfamily A, 4	Other	other	DOWN	ENSMUSG00000103677	PCDHGA4
Pdxp	pyridoxal phosphatase	Plasma Membrane	phosphatase	DOWN	ENSMUSG00000116165	PDXP
Pdyn	prodynorphin	Extracellular Space	transporter	DOWN	ENSMUSG00000027400	PDYN
Pgbd5	piggyBac transposable element derived 5	Nucleus	enzyme	DOWN	ENSMUSG00000050751	PGBD5
Pla2g7	phospholipase A2 group VII	Extracellular Space	enzyme	DOWN	ENSMUSG00000023913	PLA2G7
Plch2	phospholipase C eta 2	Cytoplasm	enzyme	DOWN	ENSMUSG00000029055	PLCH2
Pnma8a	PNMA family member 8A	Other	other	DOWN	ENSMUSG00000041141	PNMA8A
Pnma8b	PNMA family member 8B	Other	other	DOWN	ENSMUSG00000070802	PNMA8B
Pnpla7	patatin like phospholipase domain containing 7	Cytoplasm	enzyme	DOWN	ENSMUSG00000036833	PNPLA7
Prrt1	proline-rich transmembrane protein 1	Plasma Membrane	other	DOWN	ENSMUSG00000015476	PRRT1
Ptpro	protein tyrosine phosphatase receptor type O	Plasma Membrane	phosphatase	DOWN	ENSMUSG00000030223	PTPRO
Ralyl	RALY RNA binding protein like	Nucleus	other	DOWN	ENSMUSG00000039717	RALYL
Rfng	RFNG O-fucosylpeptide 3-beta-N-acetylglucosaminyltransferase	Cytoplasm	enzyme	DOWN	ENSMUSG00000025158	RFNG
Rnf112	ring finger protein 112	Nucleus	transcription regulator	DOWN	ENSMUSG00000010086	RNF112
Rnf157	ring finger protein 157	Cytoplasm	enzyme	DOWN	ENSMUSG00000052949	RNF157
Rogdi	rogdi atypical leucine zipper	Nucleus	other	DOWN	ENSMUSG00000022540	ROGDI
Rpl9	ribosomal protein L9	Nucleus	other	DOWN	ENSMUSG00000047215
Rps29	ribosomal protein S29	Cytoplasm	other	DOWN	ENSMUSG00000034892	RPS29
Rsrp1	arginine and serine rich protein 1	Nucleus	other	DOWN	ENSMUSG00000037266	RSRP1
Rtl6	retrotransposon Gag like 6	Other	other	DOWN	ENSMUSG00000055745	RTL6
Rtn1	reticulon 1	Cytoplasm	other	DOWN	ENSMUSG00000021087	RTN1
Scn2b	sodium voltage-gated channel beta subunit 2	Plasma Membrane	ion channel	DOWN	ENSMUSG00000070304	SCN2B
Scrn3	secernin 3	Other	other	DOWN	ENSMUSG00000008226	SCRN3
Sdc3	syndecan 3	Plasma Membrane	other	DOWN	ENSMUSG00000025743	SDC3
Septin5	septin 5	Cytoplasm	enzyme	DOWN	ENSMUSG00000072214	SEPTIN5
Serpina3n	_	_	_	DOWN	ENSMUSG00000021091	SERPINA3
Sez6l2	seizure related 6 homolog like 2	Cytoplasm	other	DOWN	ENSMUSG00000030683	SEZ6L2
Sgta	small glutamine rich tetratricopeptide repeat co-chaperone alpha	Cytoplasm	other	DOWN	ENSMUSG00000004937	SGTA
Shfl	shiftless antiviral inhibitor of ribosomal frameshifting	Other	other	DOWN	ENSMUSG00000038884	SHFL
Slc8a2	solute carrier family 8 member A2	Cytoplasm	transporter	DOWN	ENSMUSG00000030376	SLC8A2
Snph	syntaphilin	Plasma Membrane	other	DOWN	ENSMUSG00000027457	SNPH
Stk25	serine/threonine kinase 25	Cytoplasm	kinase	DOWN	ENSMUSG00000026277	STK25
Stmn3	stathmin 3	Nucleus	other	DOWN	ENSMUSG00000027581	STMN3
Syn2	synapsin II	Plasma Membrane	other	DOWN	ENSMUSG00000009394	SYN2
Syna	syncytin a	Other	other	DOWN	ENSMUSG00000085957	ERVFRD-1
Syt13	synaptotagmin 13	Plasma Membrane	transporter	DOWN	ENSMUSG00000027220	SYT13
Tagln3	transgelin 3	Extracellular Space	other	DOWN	ENSMUSG00000022658	TAGLN3
Thrsp	thyroid hormone responsive	Nucleus	other	DOWN	ENSMUSG00000035686	THRSP
Tmcc2	transmembrane and coiled-coil domain family 2	Extracellular Space	other	DOWN	ENSMUSG00000042066	TMCC2
Tmem222	transmembrane protein 222	Plasma Membrane	other	DOWN	ENSMUSG00000028857	TMEM222
Tmem59l	transmembrane protein 59 like	Cytoplasm	other	DOWN	ENSMUSG00000035964	TMEM59L
Tmsb4x	_	_	_	DOWN	ENSMUSG00000049775	TMSB4Y
Trim46	tripartite motif containing 46	Cytoplasm	other	DOWN	ENSMUSG00000042766	TRIM46
Tspyl5	TSPY like 5	Other	other	DOWN	ENSMUSG00000038984	TSPYL5
Tubb2a	tubulin beta 2A class IIa	Cytoplasm	other	DOWN	ENSMUSG00000058672	TUBB2A
Tubb2b	tubulin beta 2B class IIb	Cytoplasm	other	DOWN	ENSMUSG00000045136	TUBB2B
Ubl4a	ubiquitin like 4A	Cytoplasm	enzyme	DOWN	ENSMUSG00000015290	UBL4A
Ubqln4	ubiquilin 4	Cytoplasm	other	DOWN	ENSMUSG00000008604	UBQLN4
Ypel5	yippee like 5	Nucleus	other	DOWN	ENSMUSG00000039770	YPEL5
Zc3hc1	zinc finger C3HC-type containing 1	Nucleus	other	DOWN	ENSMUSG00000039130	ZC3HC1
Zfp941	zinc finger protein 941	Other	other	DOWN	ENSMUSG00000060314
Abca1	ATP binding cassette subfamily A member 1	Plasma Membrane	transporter	UP	ENSMUSG00000015243	ABCA1
Abcc4	ATP binding cassette subfamily C member 4	Plasma Membrane	transporter	UP	ENSMUSG00000032849	ABCC4
Abhd2	abhydrolase domain containing 2, acylglycerol lipase	Cytoplasm	enzyme	UP	ENSMUSG00000039202	ABHD2
Acaa2	acetyl-CoA acyltransferase 2	Cytoplasm	enzyme	UP	ENSMUSG00000036880	ACAA2
Acacb	acetyl-CoA carboxylase beta	Cytoplasm	enzyme	UP	ENSMUSG00000042010	ACACB
Acss3	acyl-CoA synthetase short chain family member 3	Cytoplasm	enzyme	UP	ENSMUSG00000035948	ACSS3
Adam17	ADAM metallopeptidase domain 17	Plasma Membrane	peptidase	UP	ENSMUSG00000052593	ADAM17
Adgrv1	adhesion G protein-coupled receptor V1	Plasma Membrane	G-protein coupled receptor	UP	ENSMUSG00000069170	ADGRV1
Aebp1	AE binding protein 1	Nucleus	peptidase	UP	ENSMUSG00000020473	AEBP1
AI506816	expressed sequence AI506816	Other	other	UP	ENSMUSG00000105987
Akap10	A-kinase anchoring protein 10	Cytoplasm	other	UP	ENSMUSG00000047804	AKAP10
Akap9	A kinase (PRKA) anchor protein (yotiao) 9	Cytoplasm	other	UP	ENSMUSG00000040407	AKAP9
Alms1	ALMS1 centrosome and basal body associated protein	Cytoplasm	other	UP	ENSMUSG00000063810	ALMS1
Alpl	alkaline phosphatase, biomineralization associated	Plasma Membrane	phosphatase	UP	ENSMUSG00000028766	ALPL
Amotl1	angiomotin like 1	Plasma Membrane	other	UP	ENSMUSG00000013076	AMOTL1
Ano6	anoctamin 6	Plasma Membrane	ion channel	UP	ENSMUSG00000064210	ANO6
Aox1	aldehyde oxidase 1	Cytoplasm	enzyme	UP	ENSMUSG00000063558	AOX1
Aox3	aldehyde oxidase 3	Cytoplasm	enzyme	UP	ENSMUSG00000064294
Arap1	ArfGAP with RhoGAP domain, ankyrin repeat and PH domain 1	Cytoplasm	other	UP	ENSMUSG00000032812	ARAP1
Arfgef2	ADP ribosylation factor guanine nucleotide exchange factor 2	Cytoplasm	other	UP	ENSMUSG00000074582	ARFGEF2
Arhgap18	Rho GTPase activating protein 18	Cytoplasm	other	UP	ENSMUSG00000039031	ARHGAP18
Arhgef5	Rho guanine nucleotide exchange factor 5	Cytoplasm	other	UP	ENSMUSG00000033542	ARHGEF5
Arl4a	ADP ribosylation factor like GTPase 4A	Nucleus	enzyme	UP	ENSMUSG00000047446	ARL4A
Arsg	arylsulfatase G	Cytoplasm	enzyme	UP	ENSMUSG00000020604	ARSG
Asah2	N-acylsphingosine amidohydrolase 2	Cytoplasm	enzyme	UP	ENSMUSG00000024887	ASAH2
Asah2	N-acylsphingosine amidohydrolase 2	Cytoplasm	enzyme	UP	ENSMUSG00000024887	ASAH2B
Atp11a	ATPase phospholipid transporting 11A	Plasma Membrane	transporter	UP	ENSMUSG00000031441	ATP11A
Atp11c	ATPase phospholipid transporting 11C	Plasma Membrane	transporter	UP	ENSMUSG00000062949	ATP11C
Atp2b3	ATPase plasma membrane Ca2+ transporting 3	Plasma Membrane	transporter	UP	ENSMUSG00000031376	ATP2B3
Atp2b4	ATPase plasma membrane Ca2+ transporting 4	Plasma Membrane	transporter	UP	ENSMUSG00000026463	ATP2B4
Atp7a	ATPase copper transporting alpha	Plasma Membrane	transporter	UP	ENSMUSG00000033792	ATP7A
B4galt1	beta-1,4-galactosyltransferase 1	Cytoplasm	enzyme	UP	ENSMUSG00000028413	B4GALT1
Bad	BCL2 associated agonist of cell death	Cytoplasm	other	UP	ENSMUSG00000024959	BAD
Baiap2l1	BAR/IMD domain containing adaptor protein 2 like 1	Cytoplasm	other	UP	ENSMUSG00000038859	BAIAP2L1
Bbx	BBX high mobility group box domain containing	Nucleus	transcription regulator	UP	ENSMUSG00000022641	BBX
Best3	bestrophin 3	Nucleus	ion channel	UP	ENSMUSG00000020169	BEST3
Bicc1	BicC family RNA binding protein 1	Other	other	UP	ENSMUSG00000014329	BICC1
Brwd3	bromodomain and WD repeat domain containing 3	Other	other	UP	ENSMUSG00000063663	BRWD3
Btaf1	B-TFIID TATA-box binding protein associated factor 1	Nucleus	transcription regulator	UP	ENSMUSG00000040565	BTAF1
Btd	biotinidase	Extracellular Space	enzyme	UP	ENSMUSG00000021900	BTD
Cab39l	calcium binding protein 39 like	Cytoplasm	kinase	UP	ENSMUSG00000021981	CAB39L
Cachd1	cache domain containing 1	Other	other	UP	ENSMUSG00000028532	CACHD1
Calml4	calmodulin like 4	Other	other	UP	ENSMUSG00000032246	CALML4
Car14	_	_	_	UP	ENSMUSG00000038526	CA14
Catip	ciliogenesis associated TTC17 interacting protein	Other	other	UP	ENSMUSG00000073650	CATIP
Cavin2	caveolae associated protein 2	Plasma Membrane	other	UP	ENSMUSG00000045954	CAVIN2
Ccdc102a	coiled-coil domain containing 102A	Other	other	UP	ENSMUSG00000063605	CCDC102A
Ccdc141	coiled-coil domain containing 141	Cytoplasm	other	UP	ENSMUSG00000044033	CCDC141
Ccdc24	coiled-coil domain containing 24	Other	other	UP	ENSMUSG00000078588	CCDC24
Ccdc39	coiled-coil domain containing 39	Cytoplasm	other	UP	ENSMUSG00000027676	CCDC39
Ccdc80	coiled-coil domain containing 80	Nucleus	other	UP	ENSMUSG00000022665	CCDC80
Cd164	CD164 molecule	Plasma Membrane	other	UP	ENSMUSG00000019818	CD164
Cd55	CD55 molecule (Cromer blood group)	Plasma Membrane	other	UP	ENSMUSG00000026399	CD55
Cd59a	CD59a antigen	Plasma Membrane	other	UP	ENSMUSG00000032679	CD59
Cd82	CD82 molecule	Plasma Membrane	other	UP	ENSMUSG00000027215	CD82
Cd9	CD9 molecule	Plasma Membrane	other	UP	ENSMUSG00000030342	CD9
Cdc14b	cell division cycle 14B	Nucleus	phosphatase	UP	ENSMUSG00000033102	CDC14C
Cdc14b	cell division cycle 14B	Nucleus	phosphatase	UP	ENSMUSG00000033102	CDC14B
Celsr1	cadherin EGF LAG seven-pass G-type receptor 1	Plasma Membrane	G-protein coupled receptor	UP	ENSMUSG00000016028	CELSR1
Cep162	centrosomal protein 162	Nucleus	other	UP	ENSMUSG00000056919	CEP162
Cep290	centrosomal protein 290	Cytoplasm	transcription regulator	UP	ENSMUSG00000019971	CEP290
Cep350	centrosomal protein 350	Cytoplasm	other	UP	ENSMUSG00000033671	CEP350
Cfap126	cilia and flagella associated protein 126	Cytoplasm	other	UP	ENSMUSG00000026649	CFAP126
Cfap206	cilia and flagella associated protein 206	Cytoplasm	other	UP	ENSMUSG00000028294	CFAP206
Cfap43	cilia and flagella associated protein 43	Cytoplasm	other	UP	ENSMUSG00000044948	CFAP43
Cfap44	cilia and flagella associated protein 44	Extracellular Space	peptidase	UP	ENSMUSG00000071550	CFAP44
Cfap54	cilia and flagella associated protein 54	Cytoplasm	other	UP	ENSMUSG00000020014	CFAP54
Cfap61	cilia and flagella associated protein 61	Other	other	UP	ENSMUSG00000037143	CFAP61
Cfap65	cilia and flagella associated protein 65	Cytoplasm	other	UP	ENSMUSG00000047021	CFAP65
Cfap69	cilia and flagella associated protein 69	Cytoplasm	other	UP	ENSMUSG00000040473	CFAP69
Cfap70	cilia and flagella associated protein 70	Cytoplasm	other	UP	ENSMUSG00000039543	CFAP70
Cfap91	cilia and flagella associated protein 91	Cytoplasm	other	UP	ENSMUSG00000022805	CFAP91
Cflar	CASP8 and FADD like apoptosis regulator	Cytoplasm	other	UP	ENSMUSG00000026031	CFLAR
Cgn	cingulin	Plasma Membrane	other	UP	ENSMUSG00000068876	CGN
Cgnl1	cingulin like 1	Plasma Membrane	other	UP	ENSMUSG00000032232	CGNL1
Chdh	choline dehydrogenase	Cytoplasm	enzyme	UP	ENSMUSG00000015970	CHDH
Clcn5	chloride voltage-gated channel 5	Plasma Membrane	ion channel	UP	ENSMUSG00000004317	CLCN5
Cndp1	carnosine dipeptidase 1	Cytoplasm	peptidase	UP	ENSMUSG00000056162	CNDP1
Cnksr3	CNKSR family member 3	Plasma Membrane	kinase	UP	ENSMUSG00000015202
Cobll1	cordon-bleu WH2 repeat protein like 1	Extracellular Space	other	UP	ENSMUSG00000034903	COBLL1
Col14a1	collagen type XIV alpha 1 chain	Extracellular Space	other	UP	ENSMUSG00000022371	COL14A1
Col18a1	collagen type XVIII alpha 1 chain	Extracellular Space	other	UP	ENSMUSG00000001435	COL18A1
Col4a5	collagen type IV alpha 5 chain	Extracellular Space	other	UP	ENSMUSG00000031274	COL4A5
Cpq	carboxypeptidase Q	Extracellular Space	peptidase	UP	ENSMUSG00000039007	CPQ
Cpt1a	carnitine palmitoyltransferase 1A	Cytoplasm	enzyme	UP	ENSMUSG00000024900	CPT1A
Cpt1b	carnitine palmitoyltransferase 1B	Cytoplasm	enzyme	UP	ENSMUSG00000078937	CPT1B
Cpt2	carnitine palmitoyltransferase 2	Cytoplasm	enzyme	UP	ENSMUSG00000028607	CPT2
Crb2	crumbs cell polarity complex component 2	Extracellular Space	other	UP	ENSMUSG00000035403	CRB2
Crhr2	corticotropin releasing hormone receptor 2	Plasma Membrane	G-protein coupled receptor	UP	ENSMUSG00000003476	CRHR2
Csrp2	cysteine and glycine rich protein 2	Nucleus	other	UP	ENSMUSG00000020186	CSRP2
Ctnna1	catenin alpha 1	Plasma Membrane	other	UP	ENSMUSG00000037815	CTNNA1
Ctnnal1	catenin alpha like 1	Plasma Membrane	other	UP	ENSMUSG00000038816	CTNNAL1
Ctsc	cathepsin C	Cytoplasm	peptidase	UP	ENSMUSG00000030560	CTSC
Cul4b	cullin 4B	Nucleus	other	UP	ENSMUSG00000031095	CUL4B
Cxadr	CXADR Ig-like cell adhesion molecule	Plasma Membrane	transmembrane receptor	UP	ENSMUSG00000022865	CXADR
Cyyr1	cysteine and tyrosine rich 1	Other	other	UP	ENSMUSG00000041134	CYYR1
D930048N14Rik	RIKEN cDNA D930048N14 gene	Other	other	UP	ENSMUSG00000052563
Dab2	DAB adaptor protein 2	Plasma Membrane	other	UP	ENSMUSG00000022150	DAB2
Ddr2	discoidin domain receptor tyrosine kinase 2	Plasma Membrane	kinase	UP	ENSMUSG00000026674	DDR2
Dennd4c	DENN domain containing 4C	Cytoplasm	other	UP	ENSMUSG00000038024	DENND4C
Deptor	DEP domain containing MTOR interacting protein	Cytoplasm	other	UP	ENSMUSG00000022419	DEPTOR
Dgki	diacylglycerol kinase iota	Cytoplasm	kinase	UP	ENSMUSG00000038665	DGKI
Dnaaf3	dynein axonemal assembly factor 3	Other	other	UP	ENSMUSG00000055809	DNAAF3
Dnah11	dynein axonemal heavy chain 11	Cytoplasm	enzyme	UP	ENSMUSG00000018581	DNAH11
Dnah6	dynein axonemal heavy chain 6	Extracellular Space	other	UP	ENSMUSG00000052861	DNAH6
Dnah7b	_	_	_	UP	ENSMUSG00000041144	DNAH7
Dnai3	dynein axonemal intermediate chain 3	Cytoplasm	other	UP	ENSMUSG00000043020	DNAI3
Dnajc3	DnaJ heat shock protein family (Hsp40) member C3	Cytoplasm	other	UP	ENSMUSG00000022136	DNAJC3
Dock5	dedicator of cytokinesis 5	Cytoplasm	other	UP	ENSMUSG00000044447	DOCK5
Dock7	dedicator of cytokinesis 7	Plasma Membrane	other	UP	ENSMUSG00000028556	DOCK7
Ednrb	endothelin receptor type B	Plasma Membrane	G-protein coupled receptor	UP	ENSMUSG00000022122	EDNRB
Efemp2	EGF containing fibulin extracellular matrix protein 2	Extracellular Space	other	UP	ENSMUSG00000024909	EFEMP2
Efs	embryonal Fyn-associated substrate	Cytoplasm	other	UP	ENSMUSG00000022203	EFS
Elmo3	engulfment and cell motility 3	Cytoplasm	other	UP	ENSMUSG00000014791	ELMO3
Elovl7	ELOVL fatty acid elongase 7	Cytoplasm	enzyme	UP	ENSMUSG00000021696	ELOVL7
Eno4	enolase 4	Extracellular Space	enzyme	UP	ENSMUSG00000048029	ENO4
Ephx1	epoxide hydrolase 1	Cytoplasm	peptidase	UP	ENSMUSG00000038776	EPHX1
Erich2	glutamate rich 2	Other	other	UP	ENSMUSG00000075302	ERICH2
Erlin2	ER lipid raft associated 2	Cytoplasm	other	UP	ENSMUSG00000031483	ERLIN2
Ern1	endoplasmic reticulum to nucleus signaling 1	Cytoplasm	kinase	UP	ENSMUSG00000020715	ERN1
Ezr	ezrin	Plasma Membrane	other	UP	ENSMUSG00000052397	EZR
F11r	F11 receptor	Plasma Membrane	other	UP	ENSMUSG00000038235	F11R
Fam107b	family with sequence similarity 107 member B	Other	other	UP	ENSMUSG00000026655	FAM107B
Fat1	FAT atypical cadherin 1	Plasma Membrane	other	UP	ENSMUSG00000070047	FAT1
Fbn1	fibrillin 1	Extracellular Space	other	UP	ENSMUSG00000027204	FBN1
Fgd4	FYVE, RhoGEF and PH domain containing 4	Cytoplasm	other	UP	ENSMUSG00000022788	FGD4
Fhad1	forkhead associated phosphopeptide binding domain 1	Other	other	UP	ENSMUSG00000051435	FHAD1
Fhip1a	FHF complex subunit HOOK interacting protein 1A	Other	other	UP	ENSMUSG00000051000	FHIP1A
Fkbp9	FKBP prolyl isomerase 9	Cytoplasm	enzyme	UP	ENSMUSG00000029781	FKBP9
Flna	filamin A	Cytoplasm	other	UP	ENSMUSG00000031328	FLNA
Flnb	filamin B	Cytoplasm	other	UP	ENSMUSG00000025278	FLNB
Flrt1	fibronectin leucine rich transmembrane protein 1	Plasma Membrane	other	UP	ENSMUSG00000047787	FLRT1
Flrt2	fibronectin leucine rich transmembrane protein 2	Plasma Membrane	other	UP	ENSMUSG00000047414	FLRT2
Fmn1	formin 1	Nucleus	other	UP	ENSMUSG00000044042	FMN1
Fnbp1l	formin binding protein 1-like	Cytoplasm	other	UP	ENSMUSG00000039735	FNBP1L
Fndc3b	fibronectin type III domain containing 3B	Cytoplasm	other	UP	ENSMUSG00000039286	FNDC3B
Foxj1	forkhead box J1	Nucleus	transcription regulator	UP	ENSMUSG00000034227	FOXJ1
Fras1	Fraser extracellular matrix complex subunit 1	Extracellular Space	other	UP	ENSMUSG00000034687	FRAS1
Frem1	FRAS1 related extracellular matrix 1	Extracellular Space	other	UP	ENSMUSG00000059049	FREM1
Frrs1	ferric chelate reductase 1	Plasma Membrane	transmembrane receptor	UP	ENSMUSG00000033386	FRRS1
Fsd1l	fibronectin type III and SPRY domain containing 1 like	Other	other	UP	ENSMUSG00000054752	FSD1L
Fzd4	frizzled class receptor 4	Plasma Membrane	G-protein coupled receptor	UP	ENSMUSG00000049791	FZD4
Fzd5	frizzled class receptor 5	Plasma Membrane	G-protein coupled receptor	UP	ENSMUSG00000045005	FZD5
Ggt5	gamma-glutamyltransferase 5	Plasma Membrane	enzyme	UP	ENSMUSG00000006344	GGT5
Ghr	growth hormone receptor	Plasma Membrane	transmembrane receptor	UP	ENSMUSG00000055737	GHR
Glb1l2	galactosidase beta 1 like 2	Other	other	UP	ENSMUSG00000036395	GLB1L2
Gm14326	_	_	_	UP	ENSMUSG00000078862
Gm16201	--	Other	other	UP	ENSMUSG00000086742
Gm19439	predicted gene, 19439	Other	other	UP	ENSMUSG00000105843
Gm19500	predicted gene, 19500	Other	other	UP	ENSMUSG00000117864
Gm21986	_	_	_	UP	ENSMUSG00000096056
Gm26684	--	Other	other	UP	ENSMUSG00000097286
Gm28729	_	_	_	UP	ENSMUSG00000099564
Gm36989	_	_	_	UP	ENSMUSG00000102496
Gm37570	_	_	_	UP	ENSMUSG00000102559
Gm44167	_	_	_	UP	ENSMUSG00000108297
Gm47171	_	_	_	UP	ENSMUSG00000111340
Gm50253	_	_	_	UP	ENSMUSG00000117819
Golgb1	golgin B1	Cytoplasm	other	UP	ENSMUSG00000034243	GOLGB1
Gsn	gelsolin	Extracellular Space	other	UP	ENSMUSG00000026879	GSN
Gstm2	glutathione S-transferase mu 2	Cytoplasm	enzyme	UP	ENSMUSG00000040562	GSTM1
Gulp1	GULP PTB domain containing engulfment adaptor 1	Cytoplasm	other	UP	ENSMUSG00000056870	GULP1
H2-Aa	_	_	_	UP	ENSMUSG00000036594
H2-Eb1	_	_	_	UP	ENSMUSG00000060586
Heg1	heart development protein with EGF like domains 1	Plasma Membrane	other	UP	ENSMUSG00000075254	HEG1
Hfe	homeostatic iron regulator	Plasma Membrane	transmembrane receptor	UP	ENSMUSG00000006611	HFE
Hipk2	homeodomain interacting protein kinase 2	Nucleus	kinase	UP	ENSMUSG00000061436	HIPK2
Hipk3	homeodomain interacting protein kinase 3	Nucleus	kinase	UP	ENSMUSG00000027177	HIPK3
Hs6st2	heparan sulfate 6-O-sulfotransferase 2	Plasma Membrane	enzyme	UP	ENSMUSG00000062184	HS6ST2
Hspg2	heparan sulfate proteoglycan 2	Extracellular Space	enzyme	UP	ENSMUSG00000028763	HSPG2
Htr2c	5-hydroxytryptamine receptor 2C	Plasma Membrane	G-protein coupled receptor	UP	ENSMUSG00000041380	HTR2C
Igf2r	insulin like growth factor 2 receptor	Plasma Membrane	transmembrane receptor	UP	ENSMUSG00000023830	IGF2R
Inmt	indolethylamine N-methyltransferase	Cytoplasm	enzyme	UP	ENSMUSG00000003477	INMT
Intu	inturned planar cell polarity protein	Cytoplasm	other	UP	ENSMUSG00000060798	INTU
Iqcd	IQ motif containing D	Cytoplasm	other	UP	ENSMUSG00000029601	IQCD
Iqgap1	IQ motif containing GTPase activating protein 1	Cytoplasm	other	UP	ENSMUSG00000030536	IQGAP1
Iqub	IQ motif and ubiquitin domain containing	Cytoplasm	other	UP	ENSMUSG00000046192	IQUB
Itga1	integrin subunit alpha 1	Plasma Membrane	other	UP	ENSMUSG00000042284	ITGA1
Itgb8	integrin subunit beta 8	Plasma Membrane	other	UP	ENSMUSG00000025321	ITGB8
Itih5	inter-alpha-trypsin inhibitor heavy chain 5	Plasma Membrane	other	UP	ENSMUSG00000025780	ITIH5
Itprid2	ITPR interacting domain containing 2	Plasma Membrane	other	UP	ENSMUSG00000027007	ITPRID2
Itpripl1	ITPRIP like 1	Other	other	UP	ENSMUSG00000074825	ITPRIPL1
Kank1	KN motif and ankyrin repeat domains 1	Nucleus	transcription regulator	UP	ENSMUSG00000032702	KANK1
Kat2b	lysine acetyltransferase 2B	Nucleus	transcription regulator	UP	ENSMUSG00000000708	KAT2B
Kat6a	lysine acetyltransferase 6A	Nucleus	enzyme	UP	ENSMUSG00000031540	KAT6A
Kcnn3	potassium calcium-activated channel subfamily N member 3	Plasma Membrane	ion channel	UP	ENSMUSG00000000794	KCNN3
Kdm7a	lysine demethylase 7A	Nucleus	enzyme	UP	ENSMUSG00000042599	KDM7A
Kif9	kinesin family member 9	Cytoplasm	enzyme	UP	ENSMUSG00000032489	KIF9
Lamb1	laminin subunit beta 1	Extracellular Space	other	UP	ENSMUSG00000002900	LAMB1
Lamc3	laminin subunit gamma 3	Extracellular Space	other	UP	ENSMUSG00000026840	LAMC3
Lamp2	lysosomal associated membrane protein 2	Plasma Membrane	other	UP	ENSMUSG00000016534	LAMP2
Lca5l	lebercilin LCA5 like	Extracellular Space	other	UP	ENSMUSG00000045275	LCA5L
Ldlrap1	low density lipoprotein receptor adaptor protein 1	Cytoplasm	transporter	UP	ENSMUSG00000037295	LDLRAP1
Lepr	leptin receptor	Plasma Membrane	transmembrane receptor	UP	ENSMUSG00000057722	LEPR
Lgals1	galectin 1	Extracellular Space	other	UP	ENSMUSG00000068220	LGALS1
Lgals3	galectin 3	Extracellular Space	other	UP	ENSMUSG00000050335	LGALS3
Lmx1a	LIM homeobox transcription factor 1 alpha	Nucleus	transcription regulator	UP	ENSMUSG00000026686	LMX1A
Loxl2	lysyl oxidase like 2	Extracellular Space	enzyme	UP	ENSMUSG00000034205	LOXL2
Lratd2	LRAT domain containing 2	Plasma Membrane	other	UP	ENSMUSG00000072568	LRATD2
Lrp6	LDL receptor related protein 6	Plasma Membrane	transmembrane receptor	UP	ENSMUSG00000030201	LRP6
Lrrc23	leucine rich repeat containing 23	Plasma Membrane	other	UP	ENSMUSG00000030125	LRRC23
Lrriq1	leucine rich repeats and IQ motif containing 1	Other	other	UP	ENSMUSG00000019892	LRRIQ1
Lrrk2	leucine rich repeat kinase 2	Cytoplasm	kinase	UP	ENSMUSG00000036273	LRRK2
Ltbp3	latent transforming growth factor beta binding protein 3	Extracellular Space	other	UP	ENSMUSG00000024940	LTBP3
Ltbr	lymphotoxin beta receptor	Plasma Membrane	transmembrane receptor	UP	ENSMUSG00000030339	LTBR
Lum	lumican	Extracellular Space	other	UP	ENSMUSG00000036446	LUM
Magt1	magnesium transporter 1	Plasma Membrane	enzyme	UP	ENSMUSG00000031232	MAGT1
Mak	male germ cell associated kinase	Cytoplasm	kinase	UP	ENSMUSG00000021363	MAK
Man2b2	mannosidase alpha class 2B member 2	Cytoplasm	enzyme	UP	ENSMUSG00000029119	MAN2B2
Map3k15	mitogen-activated protein kinase kinase kinase 15	Other	other	UP	ENSMUSG00000031303	MAP3K15
Map3k19	mitogen-activated protein kinase kinase kinase 19	Other	kinase	UP	ENSMUSG00000051590	MAP3K19
Map3k2	mitogen-activated protein kinase kinase kinase 2	Cytoplasm	kinase	UP	ENSMUSG00000024383	MAP3K2
Mapk4	mitogen-activated protein kinase 4	Cytoplasm	kinase	UP	ENSMUSG00000024558	MAPK4
Mccc1	methylcrotonyl-CoA carboxylase subunit 1	Cytoplasm	enzyme	UP	ENSMUSG00000027709	MCCC1
Mitf	melanocyte inducing transcription factor	Nucleus	transcription regulator	UP	ENSMUSG00000035158	MITF
Mob1b	MOB kinase activator 1B	Cytoplasm	other	UP	ENSMUSG00000006262	MOB1B
Mospd1	motile sperm domain containing 1	Other	other	UP	ENSMUSG00000023074	MOSPD1
Mpp7	MAGUK p55 scaffold protein 7	Plasma Membrane	other	UP	ENSMUSG00000057440	MPP7
Mr1	major histocompatibility complex, class I-related	Plasma Membrane	transmembrane receptor	UP	ENSMUSG00000026471	MR1
Msx1	msh homeobox 1	Nucleus	transcription regulator	UP	ENSMUSG00000048450	MSX1
Mtmr10	myotubularin related protein 10	Cytoplasm	other	UP	ENSMUSG00000030522	MTMR10
Myo10	myosin X	Cytoplasm	enzyme	UP	ENSMUSG00000022272	MYO10
Myo7a	myosin VIIA	Cytoplasm	enzyme	UP	ENSMUSG00000030761	MYO7A
Myof	myoferlin	Nucleus	other	UP	ENSMUSG00000048612	MYOF
N4bp2	NEDD4 binding protein 2	Cytoplasm	enzyme	UP	ENSMUSG00000037795	N4BP2
Naaladl2	N-acetylated alpha-linked acidic dipeptidase like 2	Nucleus	other	UP	ENSMUSG00000102758	NAALADL2
Nav3	neuron navigator 3	Nucleus	other	UP	ENSMUSG00000020181	NAV3
Nbeal1	neurobeachin like 1	Other	other	UP	ENSMUSG00000073664	NBEAL1
Nek5	NIMA related kinase 5	Other	kinase	UP	ENSMUSG00000037738	NEK5
Nfe2l2	NFE2 like bZIP transcription factor 2	Nucleus	transcription regulator	UP	ENSMUSG00000015839	NFE2L2
Nhs	NHS actin remodeling regulator	Nucleus	other	UP	ENSMUSG00000059493	NHS
Nin	ninein	Cytoplasm	other	UP	ENSMUSG00000021068	NIN
Nipbl	NIPBL cohesin loading factor	Nucleus	transcription regulator	UP	ENSMUSG00000022141	NIPBL
Notch2	notch receptor 2	Plasma Membrane	transcription regulator	UP	ENSMUSG00000027878	NOTCH2
Npr1	natriuretic peptide receptor 1	Plasma Membrane	enzyme	UP	ENSMUSG00000027931	NPR1
Npr3	natriuretic peptide receptor 3	Plasma Membrane	G-protein coupled receptor	UP	ENSMUSG00000022206	NPR3
Nqo1	NAD(P)H quinone dehydrogenase 1	Cytoplasm	enzyme	UP	ENSMUSG00000003849	NQO1
Nufip2	nuclear FMR1 interacting protein 2	Cytoplasm	other	UP	ENSMUSG00000037857	NUFIP2
Nynrin	NYN domain and retroviral integrase containing	Other	other	UP	ENSMUSG00000075592	NYNRIN
Odad1	outer dynein arm docking complex subunit 1	Extracellular Space	other	UP	ENSMUSG00000040189
P4ha2	prolyl 4-hydroxylase subunit alpha 2	Cytoplasm	transporter	UP	ENSMUSG00000018906	P4HA2
Pag1	phosphoprotein membrane anchor with glycosphingolipid microdomains 1	Plasma Membrane	other	UP	ENSMUSG00000027508	PAG1
Parp4	poly(ADP-ribose) polymerase family member 4	Cytoplasm	enzyme	UP	ENSMUSG00000054509	PARP4
Patj	PATJ crumbs cell polarity complex component	Plasma Membrane	other	UP	ENSMUSG00000061859	PATJ
Pbxip1	PBX homeobox interacting protein 1	Nucleus	transcription regulator	UP	ENSMUSG00000042613	PBXIP1
Pcolce2	procollagen C-endopeptidase enhancer 2	Extracellular Space	other	UP	ENSMUSG00000015354	PCOLCE2
Pde5a	phosphodiesterase 5A	Cytoplasm	enzyme	UP	ENSMUSG00000053965	PDE5A
Phactr2	phosphatase and actin regulator 2	Other	other	UP	ENSMUSG00000062866	PHACTR2
Phip	pleckstrin homology domain interacting protein	Nucleus	other	UP	ENSMUSG00000032253	PHIP
Phldb2	pleckstrin homology like domain family B member 2	Cytoplasm	other	UP	ENSMUSG00000033149	PHLDB2
Pih1d2	PIH1 domain containing 2	Other	other	UP	ENSMUSG00000000167	PIH1D2
Pkn2	protein kinase N2	Cytoplasm	kinase	UP	ENSMUSG00000004591	PKN2
Plaat3	phospholipase A and acyltransferase 3	Nucleus	enzyme	UP	ENSMUSG00000060675	PLAAT3
Plce1	phospholipase C epsilon 1	Cytoplasm	enzyme	UP	ENSMUSG00000024998	PLCE1
Plekhg3	pleckstrin homology and RhoGEF domain containing G3	Cytoplasm	other	UP	ENSMUSG00000052609	PLEKHG3
Plscr2	phospholipid scramblase 2	Cytoplasm	enzyme	UP	ENSMUSG00000032372	PLSCR1
Pltp	phospholipid transfer protein	Extracellular Space	enzyme	UP	ENSMUSG00000017754	PLTP
Plvap	plasmalemma vesicle associated protein	Plasma Membrane	other	UP	ENSMUSG00000034845	PLVAP
Plxnb2	plexin B2	Plasma Membrane	transmembrane receptor	UP	ENSMUSG00000036606	PLXNB2
Polr1a	RNA polymerase I subunit A	Nucleus	enzyme	UP	ENSMUSG00000049553	POLR1A
Postn	periostin	Extracellular Space	other	UP	ENSMUSG00000027750	POSTN
Ppargc1b	PPARG coactivator 1 beta	Nucleus	transcription regulator	UP	ENSMUSG00000033871	PPARGC1B
Ppfibp2	PPFIA binding protein 2	Nucleus	phosphatase	UP	ENSMUSG00000036528	PPFIBP2
Ppp1r1b	protein phosphatase 1 regulatory inhibitor subunit 1B	Cytoplasm	phosphatase	UP	ENSMUSG00000061718	PPP1R1B
Ppp1r3b	protein phosphatase 1 regulatory subunit 3B	Cytoplasm	phosphatase	UP	ENSMUSG00000046794	PPP1R3B
Prdm11	PR/SET domain 11	Other	other	UP	ENSMUSG00000075028	PRDM11
Prkaa2	protein kinase AMP-activated catalytic subunit alpha 2	Cytoplasm	kinase	UP	ENSMUSG00000028518	PRKAA2
Prkcq	protein kinase C theta	Cytoplasm	kinase	UP	ENSMUSG00000026778	PRKCQ
Prps2	phosphoribosyl pyrophosphate synthetase 2	Cytoplasm	kinase	UP	ENSMUSG00000025742	PRPS2
Prrg4	proline rich and Gla domain 4	Plasma Membrane	other	UP	ENSMUSG00000027171	PRRG4
Psd2	pleckstrin and Sec7 domain containing 2	Plasma Membrane	other	UP	ENSMUSG00000024347	PSD2
Ptch1	patched 1	Plasma Membrane	transmembrane receptor	UP	ENSMUSG00000021466	PTCH1
Ptpn13	protein tyrosine phosphatase non-receptor type 13	Cytoplasm	phosphatase	UP	ENSMUSG00000034573	PTPN13
Ptprb	protein tyrosine phosphatase receptor type B	Plasma Membrane	phosphatase	UP	ENSMUSG00000020154	PTPRB
Qser1	glutamine and serine rich 1	Other	other	UP	ENSMUSG00000074994	QSER1
Rai14	retinoic acid induced 14	Nucleus	transcription regulator	UP	ENSMUSG00000022246	RAI14
Rasal2	RAS protein activator like 2	Extracellular Space	other	UP	ENSMUSG00000070565	RASAL2
Rassf8	Ras association domain family member 8	Extracellular Space	other	UP	ENSMUSG00000030259	RASSF8
Rassf9	Ras association domain family member 9	Cytoplasm	transporter	UP	ENSMUSG00000044921	RASSF9
Rbms1	RNA binding motif single stranded interacting protein 1	Nucleus	other	UP	ENSMUSG00000026970	RBMS1
Rbp1	retinol binding protein 1	Extracellular Space	transporter	UP	ENSMUSG00000046402	RBP1
Rif1	replication timing regulatory factor 1	Nucleus	other	UP	ENSMUSG00000036202	RIF1
Ripk4	receptor interacting serine/threonine kinase 4	Nucleus	kinase	UP	ENSMUSG00000005251	RIPK4
Rmst	rhabdomyosarcoma 2 associated transcript (non-coding RNA)	Other	other	UP	ENSMUSG00000112117
Rnaset2b	_	_	_	UP	ENSMUSG00000094724	RNASET2
Rnf152	ring finger protein 152	Cytoplasm	enzyme	UP	ENSMUSG00000047496	RNF152
Rock1	Rho associated coiled-coil containing protein kinase 1	Cytoplasm	kinase	UP	ENSMUSG00000024290	ROCK1
Ror1	receptor tyrosine kinase like orphan receptor 1	Plasma Membrane	kinase	UP	ENSMUSG00000035305	ROR1
Rs1	retinoschisin 1	Extracellular Space	other	UP	ENSMUSG00000031293	RS1
Rsph1	radial spoke head component 1	Nucleus	other	UP	ENSMUSG00000024033	RSPH1
Rsph4a	radial spoke head component 4A	Nucleus	other	UP	ENSMUSG00000039552	RSPH4A
Rsph9	radial spoke head component 9	Cytoplasm	other	UP	ENSMUSG00000023966	RSPH9
Scube3	signal peptide, CUB domain and EGF like domain containing 3	Plasma Membrane	other	UP	ENSMUSG00000038677	SCUBE3
Sec14l4	SEC14 like lipid binding 4	Other	transporter	UP	ENSMUSG00000019368	SEC14L4
Septin10	septin 10	Cytoplasm	transcription regulator	UP	ENSMUSG00000019917	SEPTIN10
Sgk3	_	_	_	UP	ENSMUSG00000025915	SGK3
Sgms1	sphingomyelin synthase 1	Cytoplasm	enzyme	UP	ENSMUSG00000040451	SGMS1
Sh3d19	SH3 domain containing 19	Plasma Membrane	other	UP	ENSMUSG00000028082	SH3D19
Sik2	salt inducible kinase 2	Cytoplasm	kinase	UP	ENSMUSG00000037112	SIK2
Six3	SIX homeobox 3	Nucleus	transcription regulator	UP	ENSMUSG00000038805	SIX3
Six3os1	SIX homeobox 3, opposite strand 1	Other	other	UP	ENSMUSG00000093460
Slc12a2	solute carrier family 12 member 2	Plasma Membrane	transporter	UP	ENSMUSG00000024597	SLC12A2
Slc12a7	solute carrier family 12 member 7	Plasma Membrane	transporter	UP	ENSMUSG00000017756	SLC12A7
Slc16a12	solute carrier family 16 member 12	Plasma Membrane	transporter	UP	ENSMUSG00000009378	SLC16A12
Slc16a2	solute carrier family 16 member 2	Plasma Membrane	transporter	UP	ENSMUSG00000033965	SLC16A2
Slc16a4	solute carrier family 16 member 4	Plasma Membrane	transporter	UP	ENSMUSG00000027896	SLC16A4
Slc16a6	solute carrier family 16 member 6	Plasma Membrane	transporter	UP	ENSMUSG00000041920	SLC16A6
Slc16a9	solute carrier family 16 member 9	Plasma Membrane	transporter	UP	ENSMUSG00000037762	SLC16A9
Slc22a8	solute carrier family 22 member 8	Plasma Membrane	transporter	UP	ENSMUSG00000063796	SLC22A8
Slc23a2	solute carrier family 23 member 2	Plasma Membrane	transporter	UP	ENSMUSG00000027340	SLC23A2
Slc24a4	solute carrier family 24 member 4	Plasma Membrane	transporter	UP	ENSMUSG00000041771	SLC24A4
Slc39a4	solute carrier family 39 member 4	Plasma Membrane	transporter	UP	ENSMUSG00000063354	SLC39A4
Slc4a10	solute carrier family 4 member 10	Plasma Membrane	transporter	UP	ENSMUSG00000026904	SLC4A10
Slc5a3	solute carrier family 5 member 3	Plasma Membrane	transporter	UP	ENSMUSG00000089774	SLC5A3
Slc5a3	solute carrier family 5 member 3	Plasma Membrane	transporter	UP	ENSMUSG00000089774
Slc6a20b	solute carrier family 6 (neurotransmitter transporter), member 20B	Plasma Membrane	transporter	UP	ENSMUSG00000025243	SLC6A20
Slc7a11	solute carrier family 7 member 11	Plasma Membrane	transporter	UP	ENSMUSG00000027737	SLC7A11
Slco1a4	solute carrier organic anion transporter family, member 1a4	Plasma Membrane	transporter	UP	ENSMUSG00000030237	SLCO1A2
Slco1c1	solute carrier organic anion transporter family member 1C1	Plasma Membrane	transporter	UP	ENSMUSG00000030235	SLCO1C1
Snap23	synaptosome associated protein 23	Plasma Membrane	transporter	UP	ENSMUSG00000027287	SNAP23
Sned1	sushi, nidogen and EGF like domains 1	Plasma Membrane	other	UP	ENSMUSG00000047793	SNED1
Sntb1	syntrophin beta 1	Plasma Membrane	other	UP	ENSMUSG00000060429	SNTB1
Sod3	superoxide dismutase 3	Extracellular Space	enzyme	UP	ENSMUSG00000072941	SOD3
Sorbs3	sorbin and SH3 domain containing 3	Cytoplasm	other	UP	ENSMUSG00000022091	SORBS3
Sowahc	sosondowah ankyrin repeat domain family member C	Nucleus	transcription regulator	UP	ENSMUSG00000098188	SOWAHC
Spag16	sperm associated antigen 16	Cytoplasm	other	UP	ENSMUSG00000053153	SPAG16
Spag6l	_	_	_	UP	ENSMUSG00000022783	SPAG6
Spata18	spermatogenesis associated 18	Cytoplasm	other	UP	ENSMUSG00000029155	SPATA18
Spata6	spermatogenesis associated 6	Cytoplasm	other	UP	ENSMUSG00000034401	SPATA6
Spen	spen family transcriptional repressor	Nucleus	transcription regulator	UP	ENSMUSG00000040761	SPEN
Steap2	STEAP2 metalloreductase	Plasma Membrane	enzyme	UP	ENSMUSG00000015653	STEAP2
Steap4	STEAP4 metalloreductase	Plasma Membrane	enzyme	UP	ENSMUSG00000012428	STEAP4
Ston1	stonin 1	Plasma Membrane	other	UP	ENSMUSG00000033855	STON1
Syne2	spectrin repeat containing nuclear envelope protein 2	Nucleus	other	UP	ENSMUSG00000063450	SYNE2
Syne3	spectrin repeat containing nuclear envelope family member 3	Nucleus	other	UP	ENSMUSG00000054150	SYNE3
Tbc1d2	TBC1 domain family member 2	Cytoplasm	other	UP	ENSMUSG00000039813	TBC1D2
Tbc1d2b	TBC1 domain family member 2B	Cytoplasm	other	UP	ENSMUSG00000037410	TBC1D2B
Tbc1d9	TBC1 domain family member 9	Plasma Membrane	other	UP	ENSMUSG00000031709	TBC1D9
Tbcel	tubulin folding cofactor E like	Other	other	UP	ENSMUSG00000037287	TBCEL
Tcea3	transcription elongation factor A3	Nucleus	transcription regulator	UP	ENSMUSG00000001604	TCEA3
Tead1	TEA domain transcription factor 1	Nucleus	transcription regulator	UP	ENSMUSG00000055320	TEAD1
Tekt1	tektin 1	Cytoplasm	other	UP	ENSMUSG00000020799	TEKT1
Tfdp2	transcription factor Dp-2	Nucleus	transcription regulator	UP	ENSMUSG00000032411	TFDP2
Tgfbi	transforming growth factor beta induced	Extracellular Space	other	UP	ENSMUSG00000035493	TGFBI
Tgfbr3	transforming growth factor beta receptor 3	Plasma Membrane	kinase	UP	ENSMUSG00000029287	TGFBR3
Timp3	TIMP metallopeptidase inhibitor 3	Extracellular Space	other	UP	ENSMUSG00000020044	TIMP3
Tjp3	tight junction protein 3	Cytoplasm	other	UP	ENSMUSG00000034917	TJP3
Tmem237	transmembrane protein 237	Extracellular Space	other	UP	ENSMUSG00000038079	TMEM237
Tmem98	transmembrane protein 98	Cytoplasm	other	UP	ENSMUSG00000035413	TMEM98
Tmtc1	transmembrane O-mannosyltransferase targeting cadherins 1	Cytoplasm	enzyme	UP	ENSMUSG00000030306	TMTC1
Tnpo1	transportin 1	Nucleus	transporter	UP	ENSMUSG00000009470	TNPO1
Tns4	tensin 4	Cytoplasm	other	UP	ENSMUSG00000017607	TNS4
Traf3ip2	TRAF3 interacting protein 2	Cytoplasm	enzyme	UP	ENSMUSG00000019842	TRAF3IP2
Trim56	tripartite motif containing 56	Cytoplasm	enzyme	UP	ENSMUSG00000043279	TRIM56
Trip10	thyroid hormone receptor interactor 10	Cytoplasm	other	UP	ENSMUSG00000019487	TRIP10
Trip11	thyroid hormone receptor interactor 11	Cytoplasm	transcription regulator	UP	ENSMUSG00000021188	TRIP11
Trpm3	transient receptor potential cation channel subfamily M member 3	Plasma Membrane	ion channel	UP	ENSMUSG00000052387	TRPM3
Ttc12	tetratricopeptide repeat domain 12	Cytoplasm	other	UP	ENSMUSG00000040219	TTC12
Ttc21a	tetratricopeptide repeat domain 21A	Extracellular Space	other	UP	ENSMUSG00000032514	TTC21A
Ttll4	tubulin tyrosine ligase like 4	Cytoplasm	enzyme	UP	ENSMUSG00000033257	TTLL4
Ucp2	uncoupling protein 2	Cytoplasm	transporter	UP	ENSMUSG00000033685	UCP2
Usp54	ubiquitin specific peptidase 54	Other	peptidase	UP	ENSMUSG00000034235	USP54
Utrn	utrophin	Plasma Membrane	transmembrane receptor	UP	ENSMUSG00000019820	UTRN
Vamp8	vesicle associated membrane protein 8	Plasma Membrane	transporter	UP	ENSMUSG00000050732	VAMP8
Vcam1	vascular cell adhesion molecule 1	Plasma Membrane	transmembrane receptor	UP	ENSMUSG00000027962	VCAM1
Vldlr	very low density lipoprotein receptor	Plasma Membrane	transporter	UP	ENSMUSG00000024924	VLDLR
Vwa5b1	von Willebrand factor A domain containing 5B1	Extracellular Space	other	UP	ENSMUSG00000028753	VWA5B1
Wfikkn2	WAP, follistatin/kazal, immunoglobulin, kunitz and netrin domain containing 2	Extracellular Space	other	UP	ENSMUSG00000044177	WFIKKN2
Wls	Wnt ligand secretion mediator	Cytoplasm	other	UP	ENSMUSG00000028173	WLS
Yap1	Yes1 associated transcriptional regulator	Nucleus	transcription regulator	UP	ENSMUSG00000053110	YAP1
Zc3h12c	zinc finger CCCH-type containing 12C	Other	other	UP	ENSMUSG00000035164	ZC3H12C
Zdbf2	zinc finger DBF-type containing 2	Nucleus	other	UP	ENSMUSG00000027520	ZDBF2
Zfhx3	zinc finger homeobox 3	Nucleus	transcription regulator	UP	ENSMUSG00000038872	ZFHX3
Zfp185	zinc finger protein 185	Nucleus	other	UP	ENSMUSG00000031351	ZNF185
Zfp462	_	_	_	UP	ENSMUSG00000060206	ZNF462
Zfp467	_	_	_	UP	ENSMUSG00000068551	ZNF467
Zfp516	_	_	_	UP	ENSMUSG00000058881	ZNF516
Zfp52	zinc finger protein 52	Other	other	UP	ENSMUSG00000051341
Zfp966	_	_	_	UP	ENSMUSG00000089756
Zfyve16	zinc finger FYVE-type containing 16	Nucleus	other	UP	ENSMUSG00000021706
Zic4	Zic family member 4	Nucleus	transcription regulator	UP	ENSMUSG00000036972	ZIC4
Zkscan3	zinc finger with KRAB and SCAN domains 3	Nucleus	transcription regulator	UP	ENSMUSG00000021327	ZKSCAN4

## Sheet: Table S6
Table S6. List of genes associated to IPA pathways highlighted in Figure 2c
Disease & Molecular functions
Diseases or Functions Annotation	p-value	Activation z-score	Molecules
Plasticity of synapse	0.0129	-1.432	CAMK2A,CHRD,CPLX1,CPLX2,CX3CL1,DBN1,LEPR,NCDN,NSMF,PPP1R1B,VLDLR
Shape change of neurites	0.0383	-1.166	ARHGAP33,ARHGEF25,CAMK2A,CCDC141,CELSR1,CPNE6,DBN1,DOCK7,ELK1,EMC10,EZR,FAM107A,Fnbp1l,FYN,FZD5,ICAM5,IQUB,LRRK2,MYO10,NEFL,NRN1,PRKAA2,RNF157,ROR1,SLC23A2
Signaling Pathways
Ingenuity Canonical Pathways	-log10(p-value)	z-score	Molecules
Ion channel transport	2.19	2.309	ANO6,ATP11A,ATP11C,ATP2B3,ATP2B4,ATP6V0E2,ATP7A,BEST3,C8orf44-SGK3/SGK3,CAMK2A,CLCN5,TRPM3
SNARE Signaling Pathway	2.3	-1.265	CACNB3,CAMK2A,CPLX1,CPLX2,MYO10,NSF,SGTA,SNAP23,SYN2,SYT13
Assembly and cell surface presentation of NMDA receptors	1.53	-2	CAMK2A,NEFL,TUBB2A,TUBB2B
Upstream Regulators
Upstream Regulator	p-value of overlap	Activationz-score	Target Molecules in Dataset
BDNF	0.000602	-1.285	ACOT7,ADAM17,CAMK2A,CPLX2,FLNA,FLNB,FSCN1,KCNIP2,LGALS1,NCDN,NPR1,ODAD1,PLTP,PLXNB2,PPP1R1B,SYN2,Tmsb4x (includes others)
GRIN2A	0.0436	-1.633	ALPL,CNIH2,LRRK2,PLXNB2,RPS29,Slco1a4

## Sheet: Table S7
Table S7 : Statistics Table for Figure 1
	Table S7- Statistics of Figure 1
	Tissue	Experiment		# samples	Measurement	Genotype	Average	S.E.M.	Statistical Test	p value	F/t/z/R ETC value	Figure
	Human Hippocampus	AETA levels : ctl vs AD		13	Protein expression	Controls	1	0.1023	Mann-Whitney	p=0,0012	U=33	1b
				16		AD patient	1.471	0.09
		APP levels: ctl vs AD		13	Protein expression	Controls	1	0.1147	Mann-Whitney	p=0,1448	U=74	1c
				17		AD patient	0.9288	0.1911
		AETA levels in AD : men vs Women		6	Protein expression	men	1	0.02926	Welch's test	p=0,0070	t(10,29)=3,354	1d
				11		Women	1.813	0.2407

## Sheet: Table S8
Table S8: Statistics Table for Figure S1
		Table S8- Statistics of Figure S1
		Tissue	Experiment		# samples	Measurement	Genotype	Average	S.E.M.	Statistical Test	p value	F/t/z/R ETC value	Figure
		Human PFC	AETA levels: ctl vs AD		10	Protein expression	Controls	1	0.0811	Welch's test	p<0,0001	t(28,97)=6,876	S1b
					21		AD patient	1.979	0.117
		Human Hippocampus	APP transcript: ctl vs AD		13	delta Ct	Controls	5.706	0.243	Mann-Whitney	p=0,6801	U=100	S1c
					17		AD patient	5.876	0.2478
			AETA levels in Ctl : men vs Women		7	Protein expression	men	1	0.1508	Welch's test	p=0,6643	t(8,193)=0,4501	S1d
					6		Women	0.9258	0.06658

## Sheet: Table S9
Table S9 : Statistics Table for Figure 2
		Table S9- Statistics of Figure 2
		Tissue	Experiment		Mice	# samples	Measurement	Genotype	Average	S.E.M.	Statistical Test	p value	F/t/z/R ETC value	Figure
		AETA-m mouse Hippocampus	Human AETA levels at different ages		1 month	10	Protein expression	AETA-m	100	11.37	Ordinary one-way Anova	p=0,7347	F=0,5019	2b
					2 months	4			112.8	4.64
					6 months	4			92.69	16.43
					9 months	4			117.5	11.55
					12 months	4			111.8	16.4

## Sheet: Table S10
Table S10 : Statistics Table for Figure S2
		Table S10 - Statistics of Figure S2
		Tissue	Experiment		Mice	Measurement	unit	Genotype	Average	S.E.M.	Statistical Test	p value	F/t/z/R ETC value	Figure
		AETA-m Mice	Weight at weaning (females)		15	weight	g	WT	8.4	0.2845	Mann-Whitney	p=0,1669	U=90,5	S2b
					17			AETA-m	7.84	0.2982
			Weight at 6-8 months (females)		9	weight	g	WT	27.07	0.757	Mann-Whitney	p=0,3589	U=37	S2c
					11			AETA-m	25.69	1.183
			Experiment		Mice	# samples	Measurement	Genotype	Average	S.E.M.	Statistical Test	p value	F/t/z/R ETC value	Figure
			Thickness CA1 cell body layer		3	19	thickness	WT	37.07	0.416	Unpaired t-test	p=0,7712	t(36)=0,2930	S2d
					3	19		AETA-m	36.89	0.4249
			endogenous CTF-𝜂		3	9	Protein expression	WT	1	0.1158	Mann-Whitney	p=0,5457	U=33	S2e left
					3	9		AETA-m	0.9548	0.2173
			endogenous APP-FL		3	8	Protein expression	WT	1	0.04097	Unpaired-t test	p=0,9599	T(15)=0,0511	S2e center
					3	9		AETA-m	0.9931	0.1214
			endogenous sAPP𝛼𝛽		3	9	Protein expression	WT	1	0.1236	Mann-Whitney	p=0,9314	U=39	S2e right
					3	9		AETA-m	1.125	0.24

[truncated: 5 more sheets: Table S11, Table S12, Table S13, Table S14, Table S15]
