# Supplementary material for: AETA peptide drives Alzheimer’s disease signature of synapse dysfunction
Source: Research Square preprint supplement (doi:10.21203/rs.3.rs-8192959/v1), 2025-12-01
Supplement: Supplementary file 2 [file 82addb6f33f6bd71a939cf35.docx]

**Supplementary information**

**Title: AETA peptide drives Alzheimer’s disease signature of synapse dysfunction.**

**Journal: Acta Neuropathologica**

Jade Dunot1*, Carine Gandin1, Marin Truchi1, Giulia Pirro1, Sebastien Moreno1, Agathe Launay2, Benjamin Azoulay1, Hugo Landra1, Sandy Ma Yishan1,3, Luc Buée2, Kevin Lebrigand1, Paula A. Pousinha1, David Blum2, Bernard Mari1, Ingrid Bethus1, Michael Willem4 and Hélène Marie1*.

1 Université Côte d’Azur, CNRS, INSERM, Institut de Pharmacologie Moléculaire et Cellulaire, Valbonne, France ; 2 Univ. Lille, INSERM, CHU Lille, UMR-S1172 LilNCog - Lille Neuroscience & Cognition, Lille, France ; 3Munich Cluster for Systems Neurology (SyNergy), Munich, Germany ; 4 Biomedical Center (BMC), Division of Metabolic Biochemistry, Faculty of Medicine, Ludwig-Maximilians-Universität München, Munich, Germany

* Corresponding authors : Hélène Marie & Jade Dunot

**Email:** marie@ipmc.cnrs.fr; [jade@ad6d.net](mailto:jade@ad6d.net)

Figures S1-S5


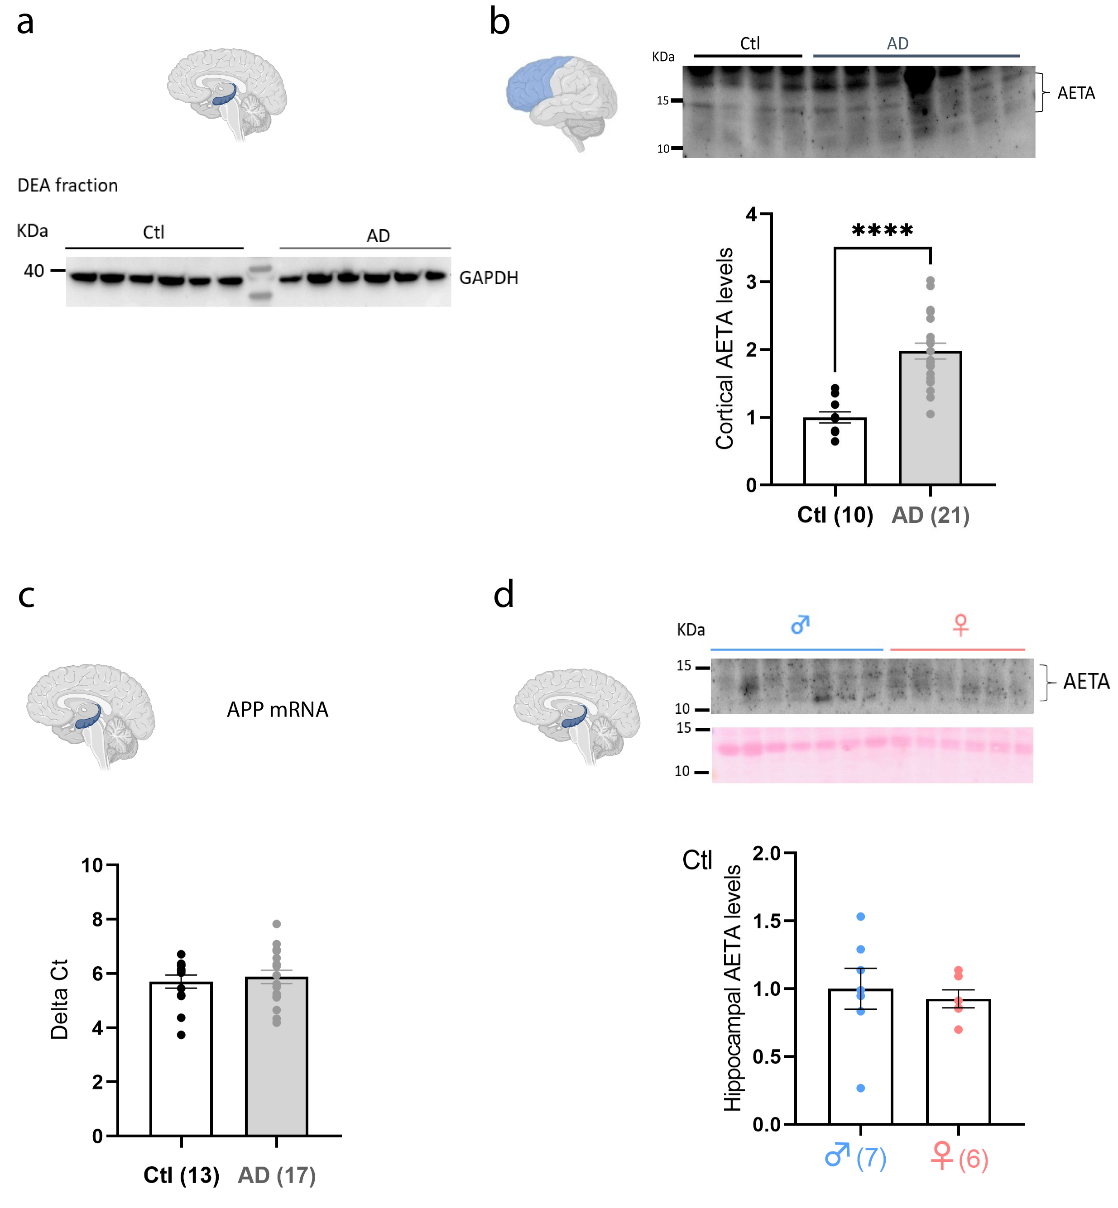


**Figure S1 (related to Figure 1): Additional AETA and APP quantification in hippocampai of AD patients and quantification of AETA in prefrontal cortex (PFC) of AD patients. (a)** General tissue integrity was confirmed by examples of GAPDH immunoblotting in DEA fractions of protein lysates. **(b)** Immunoblot (2D9 antibody) examples and quantification of AETA levels in PFC of AD patient vs control subjects (relative levels normalized to age-matched control (Ctl) subjects; normalized to actin loading control – see full blots used for analysis provided in Supplemental material). **(c)** Quantification of APP transcript by qPCR in hippocampi of human control subjects (Ctl) and AD brains. **(d)** Immunoblot (2D8 antibody and ponceau staining for normalization) examples and quantification of AETA levels inhippocampi of male vs female control subjects. N= number of human samples; each sample was tested in triplicate and presented as mean. Error bars represent s.e.m.; **** p < 0.0001. Statistics: Student’s t-test and Welch’s test and Kolmogorov-Smirnov test. See full statistics in Supplemental Table S8.


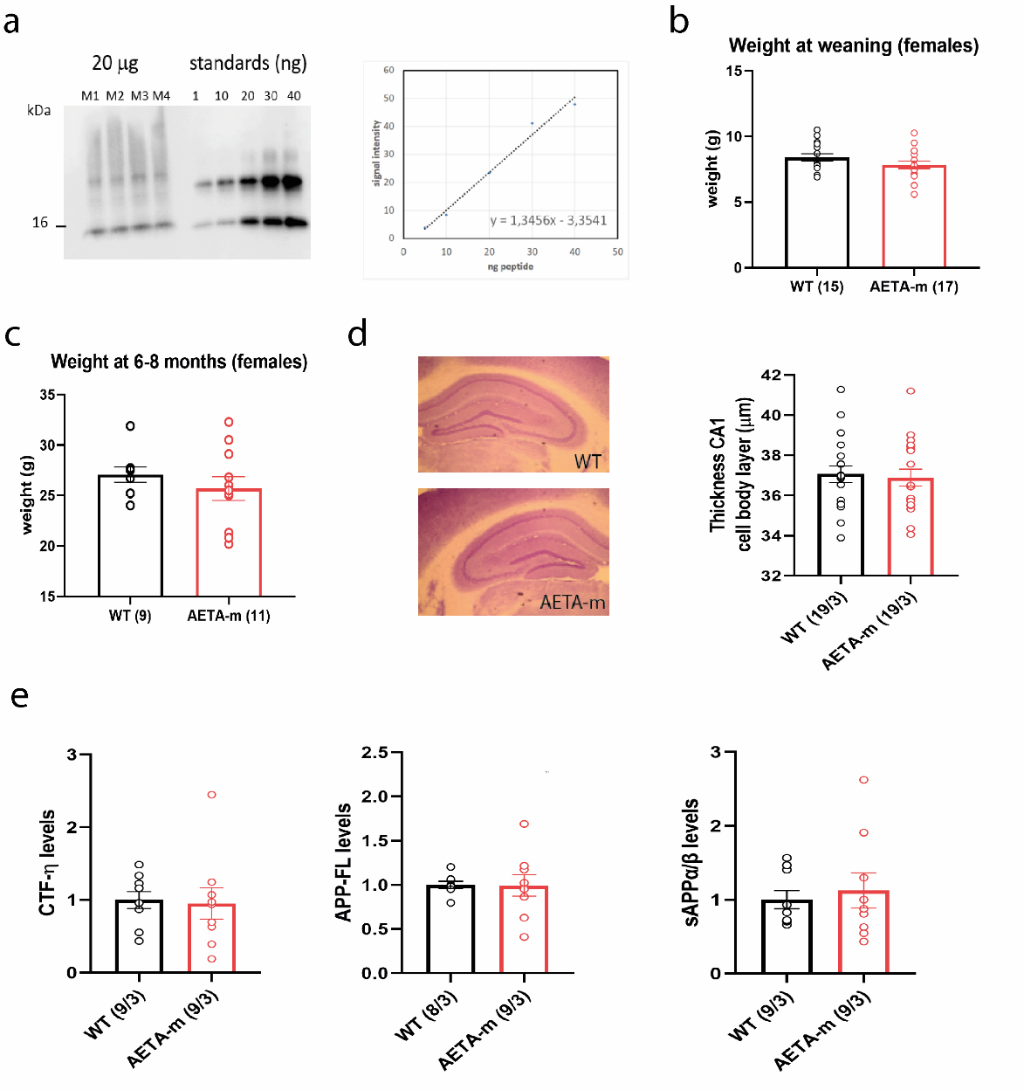


**Figure S2 (related to Figure 2): Additional characterization of AETA-m mice overexpressing secreted human AETA in the brain.** **(a)** (left) Immunoblot for quantification (2E9 antibody) of recombinant human AETA in hippocampi of four AETA-m mice (6 months old; M1-M4). The quantification was made against a standard curve of synthetic AETA (1, 10, 20, 30, 40 ng). Note that recombinant AETA seems to partially dimerize both in brain and *in vitro*. (Right) Both bands of the synthetic peptide were used to generate the standard curve and calculate the average AETA quantity (ng/g protein) using the equation shown in graph. **(b)** Weight of female WT and AETA-m mice at weaning (21 days after birth). **(c)** Weight of female WT and AETA-m mice at 6-8 months of age. **(d)** Example of cresyl violet staining of hippocampi of WT and AETA-m mice and measure of CA1 cell body layer thickness in these slices. **(e)** Quantification of endogenous levels of CTF-, full-length APP (APP-FL) and sAPP  in WT and AETA-m mouse brains by immunoblotting. Full blots used for analysis are provided in Supplemental material. Three mouse brains per genotype were processed in triplicates. N= number of mice for b-c; n/N: number of slices/number of mice for d; n/N: number of replicates/number of mice for e. Error bars represent s.e.m. Statistics: Mann-Whitney test for b, c, e left and e right. Student t-test for d and e center. See full statistics in Supplemental Table S10.


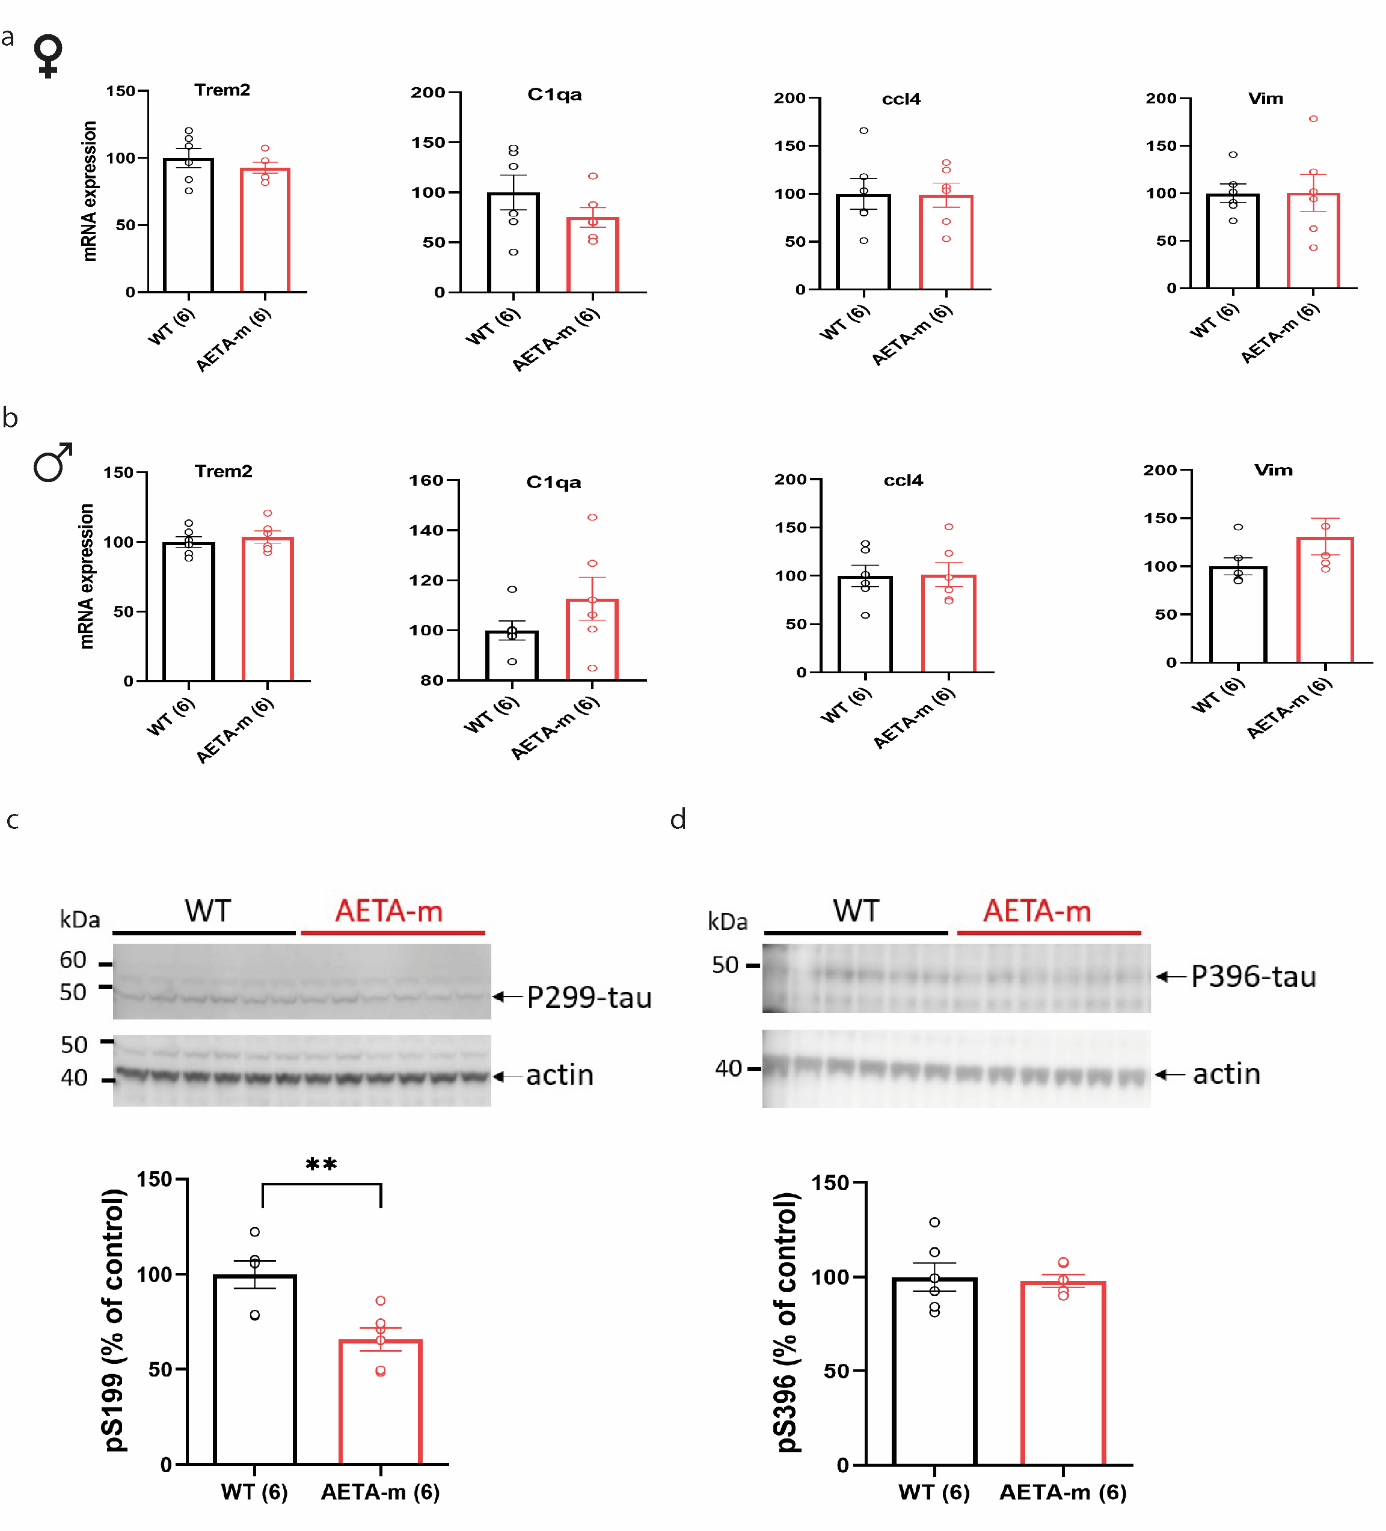


**Figure S3 (related to Figure 2): Status of neuroinflammatory markers and Tau phosphorylation in AETA-m mice.** **(a-b)** mRNA expression levels, quantified by qPCR, of markers of neuroinflammation (Trem2, C1qa, ccl4 and Vim) in 6-8 months old (a) female and (b) male WT and AETA-m mice.  **(c-d)** Immunoblots and associated quantification of endogenous levels of tau phosphorylation at positions (c) S199 and (d) S396 in 6-8 months old female mice. Full blots used for analysis are provided in Supplemental material. N= number of mice. Error bars represent s.e.m.; ** p < 0.01. Statistics: Student t-test for all expect for Vim quantification in males where Mann-Whitney was used. See full statistics in Supplemental Table S11.


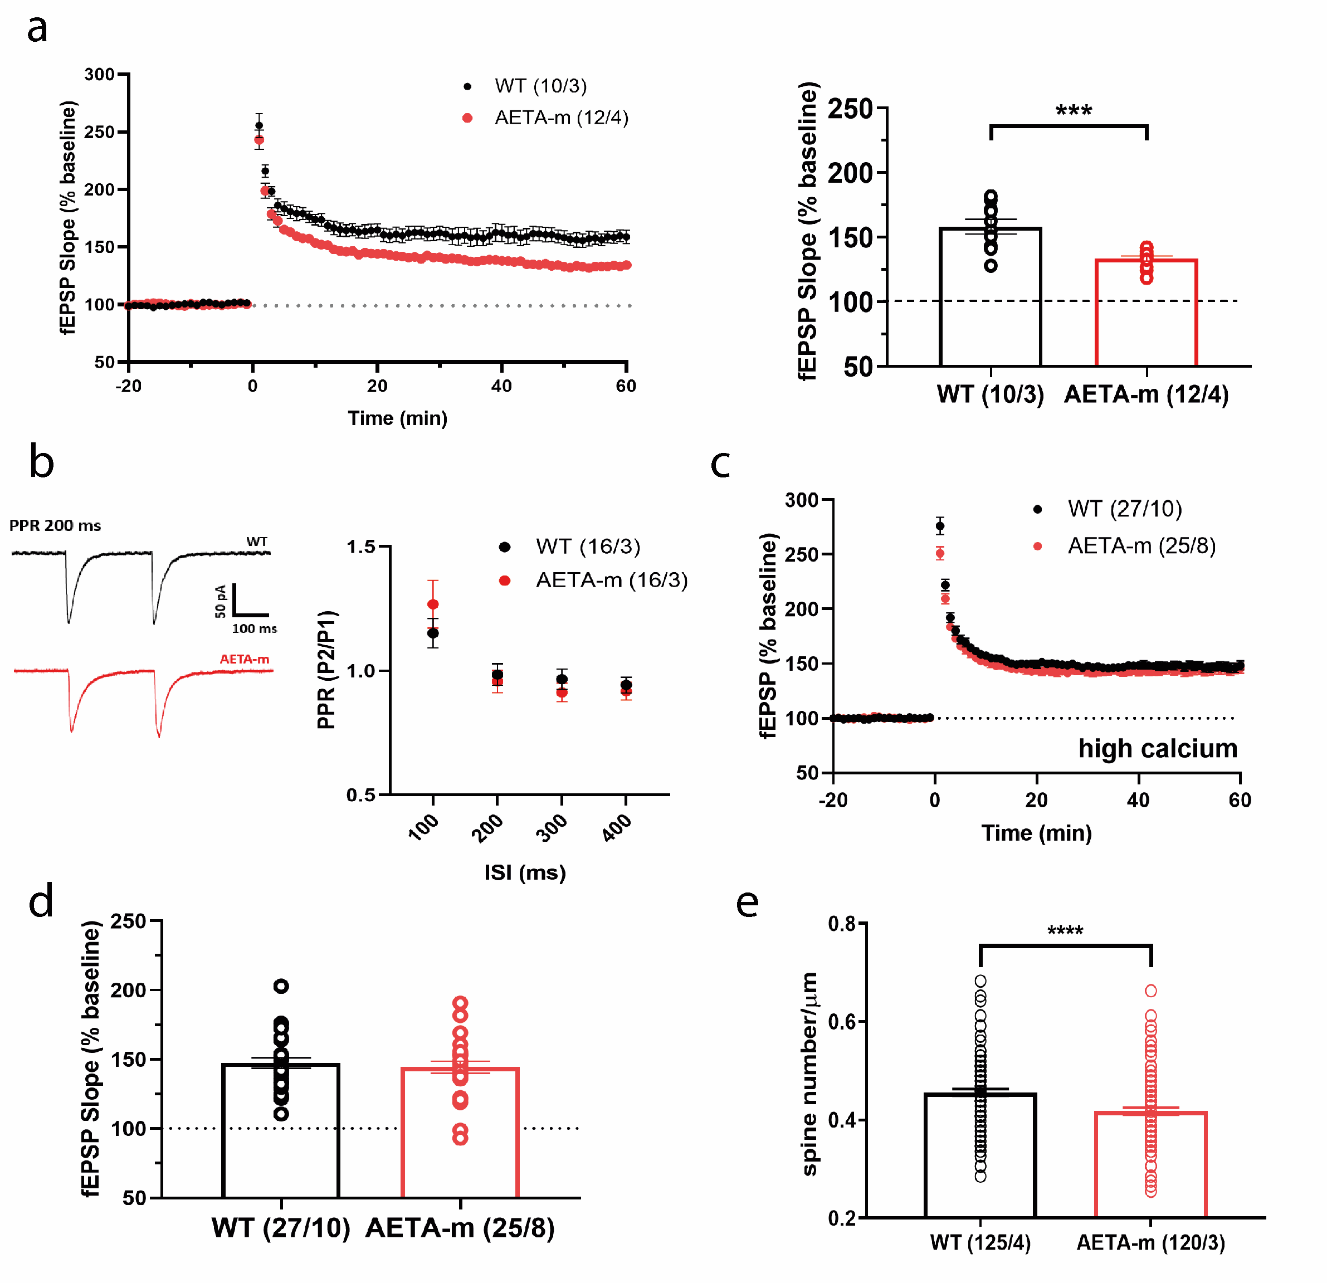


**Figure S4 (related to Figure 3): Additional data of synapse function, plasticity and spine density in CA1 pyramidal neurons of AETA-m mice.** **(a)** Time course (left; LTP induction at time 0) and bar graph (right, 45-60 min post-induction) of long-term potentiation of fEPSP slope (% baseline) at CA3-CA1 synapse in hippocampal slices of male WT and AETA-m mice. **(b)** Representative traces (left) and paired pulse ratio (pulse 2/pulse 1) analysis (right) measured in CA1 pyramidal neurons of female WT and AETA-m mice. **(c-d)** Time course (LTP induction at time 0) and bar graph (45-60 min post-induction) of long-term potentiation of fEPSP slope (% baseline) at CA3-CA1 synapse in hippocampal slices of male WT and AETA-m mice recorded with aCSF containing high calcium. **(e)** Spine density measured on segments from dendrites present in the stratum radiatum of CA1 pyramidal neurons from male WT and AETA-m mice. Error bars represent s.e.m.; *** p < 0.001; **** p < 0.0001. n/N= number of slices/mice for a, c and d; n/N= number of cells/mice for b; n/N= number of segments/mice for e. Statistics : Student t-test for a and d; Two-way ANOVA for b; Mann-Whitney for e. See full statistics in Supplemental Table S13.


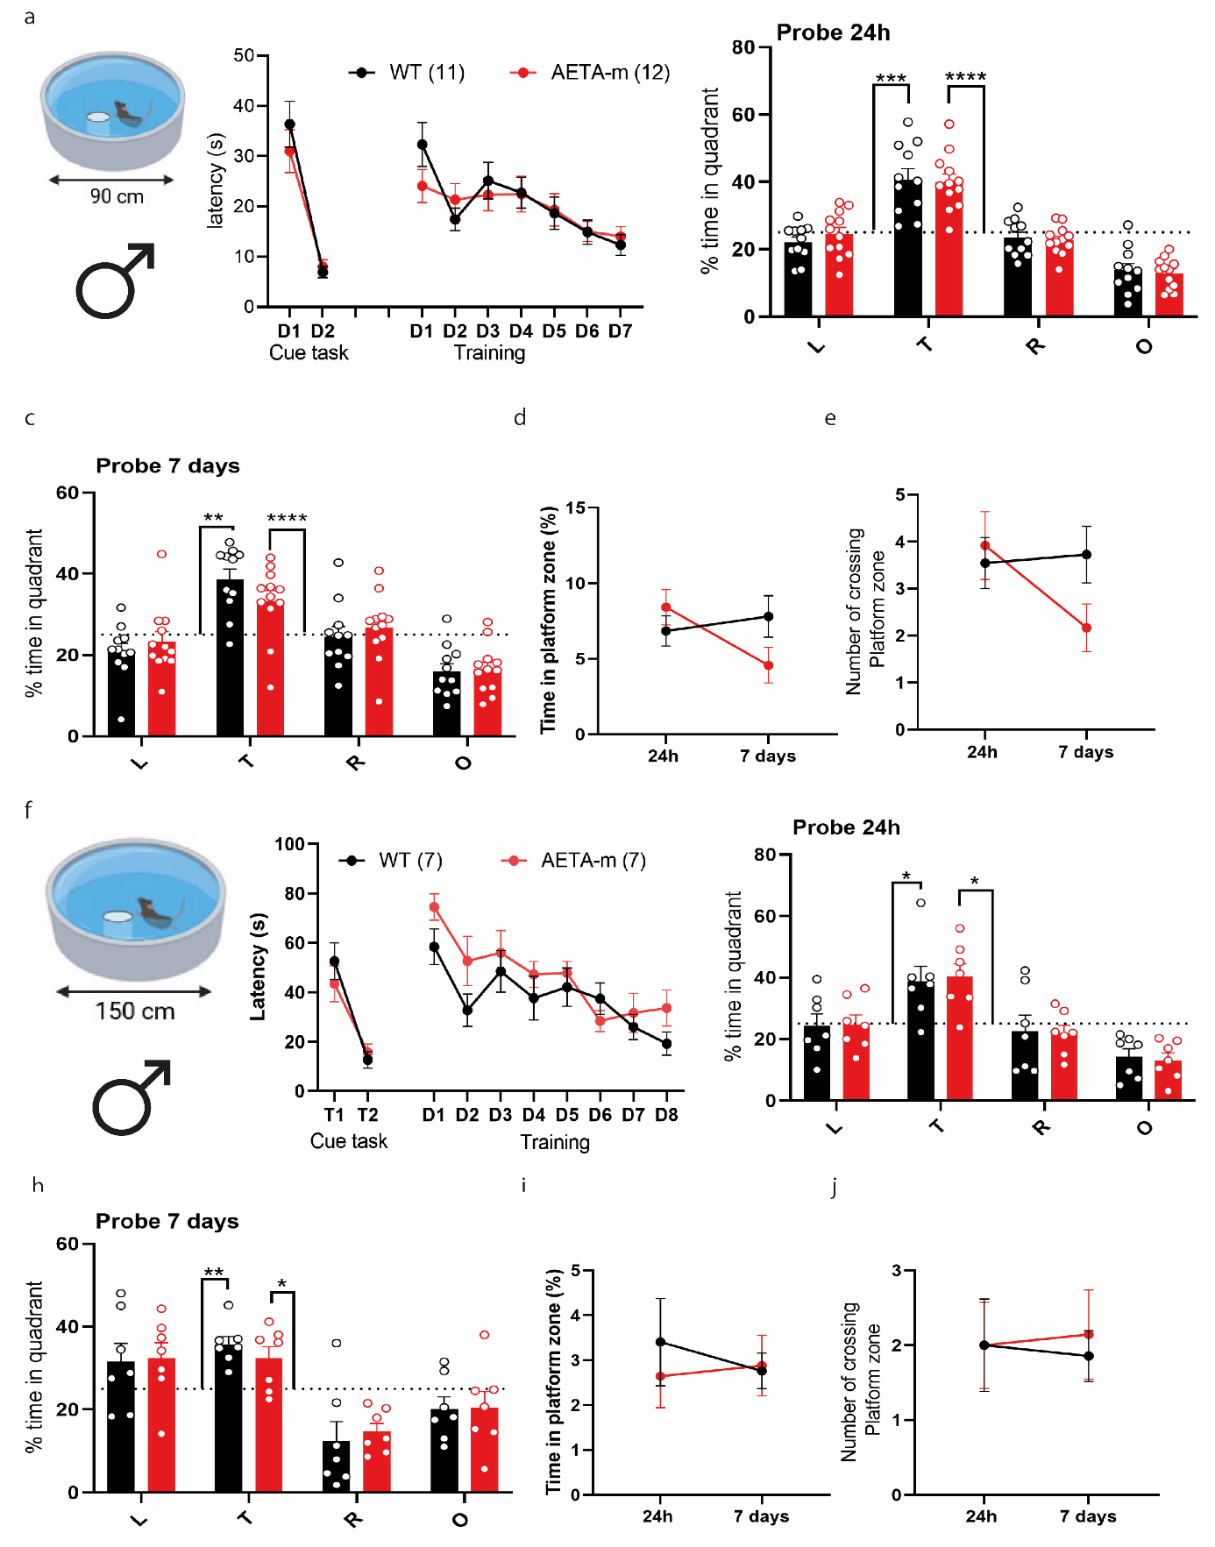


**Figure S5 (related to Figure 4): Long-term memory in male AETA-m mice.** **(a)** Latency (s) during cue task and training in 90 cm Morris water maze pool. **(b-c)** % time spend in quadrants (T: target, L: left, R: right, O: opposite) during probe test (b) at 24h, (c) at 7 days. **(d)** Time spent in platform zone at 24h and 7 days. **(e)** Number of platform crossing at 24h and 7 days. **(f)** Latency (s) during cue task and training in 150 cm Morris water maze pool. **(g-h)** % time spend in quadrants during probe test at 24h andat 7 days. **(i)** Time spent in platform zone at 24h and 7 days. **(j)** Number of platform crossing at 24h and 7 days. N= number of mice. Error bars represent s.e.m.; *p < 0.01; ** p < 0.001; *** p < 0.0001; **** p < 0.0001 between WT and AETA-m or against chance level (25%) as indicated. Statistics: two-way ANOVA. See full statistics in Supplemental Table S15.
